# Supplementary material
Source: PubMed Central journal article supplement (PMC5671999)
Supplement: supp_RA117.000154_4746_1_supp_5003_88sbn8.pdf [file supp_RA117.000154_4746_1_supp_5003_88sbn8.pdf]

## **Proteome analysis of hypoxic glioblastoma cells reveals sequential metabolic adaptation of one-carbon metabolic pathways**

Kangling Zhang<sup>1,3\*</sup>, Pei Xu<sup>4</sup>, James L. Sowers<sup>4</sup>, Daniel F. Machuca<sup>1</sup>, Barsam Mirfattah<sup>1</sup>, Jason, Herring<sup>1</sup>, Hui Tang<sup>1</sup>, Yan Chen<sup>4</sup>, Bing Tian<sup>2,3</sup>, Allan R. Brasier<sup>2,3</sup>, and Lawrence C. Sowers<sup>1,2</sup>

1. Department of Pharmacology, University of Texas Medical Branch, Galveston (UTMB), Texas, 77555
2. Institute for Translational Sciences, UTMB, Galveston, Texas, 77555
3. Sealy Center for Molecular Medicine, UTMB, Galveston, Texas, 77555
4. Department of Neuroscience and Cell Biology, UTMB, Galveston, Texas, 77555

### **The MS/MS spectra corresponding to single unique peptides used for protein identification by PEAKS 8**

*The following MS/MS spectra are numbered based upon the spectrum # in Table S4. Shown are only the MS/MS spectra of peptides belonging to the proteins whose expressions are either  $\geq 2.0$  (up-regulated, red colored) or  $\leq -2.0$  (down-regulated, green colored).*

### 1. MS/MS at m/z 611.79034 (2+, RT=43.9018)

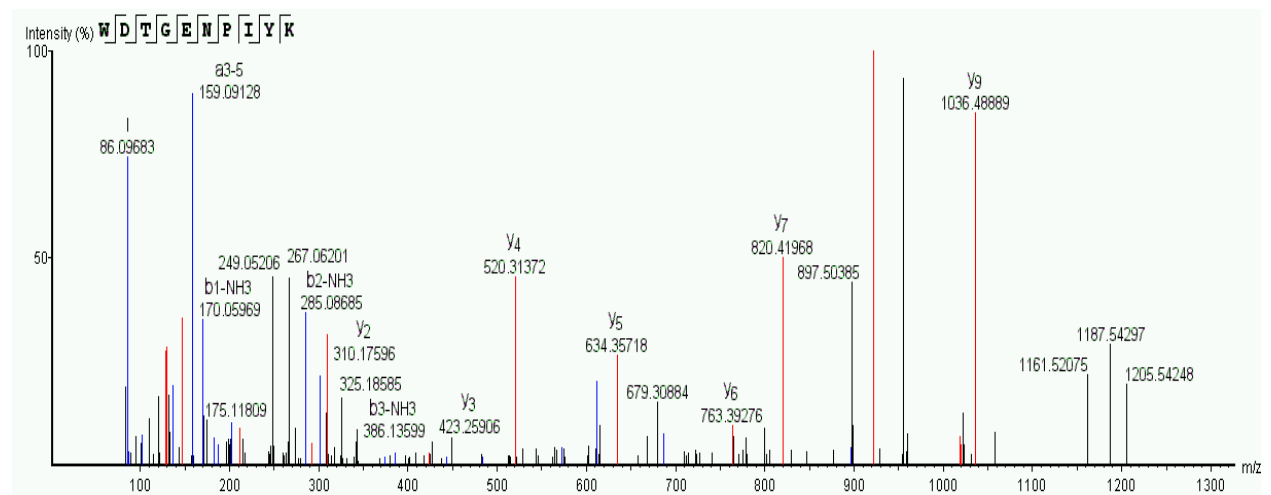

Identified protein:

|P05556|ITB1\_HUMAN Integrin beta-1

## 2. MS/MS at m/z 682.3388 (2+, RT=51.6719)

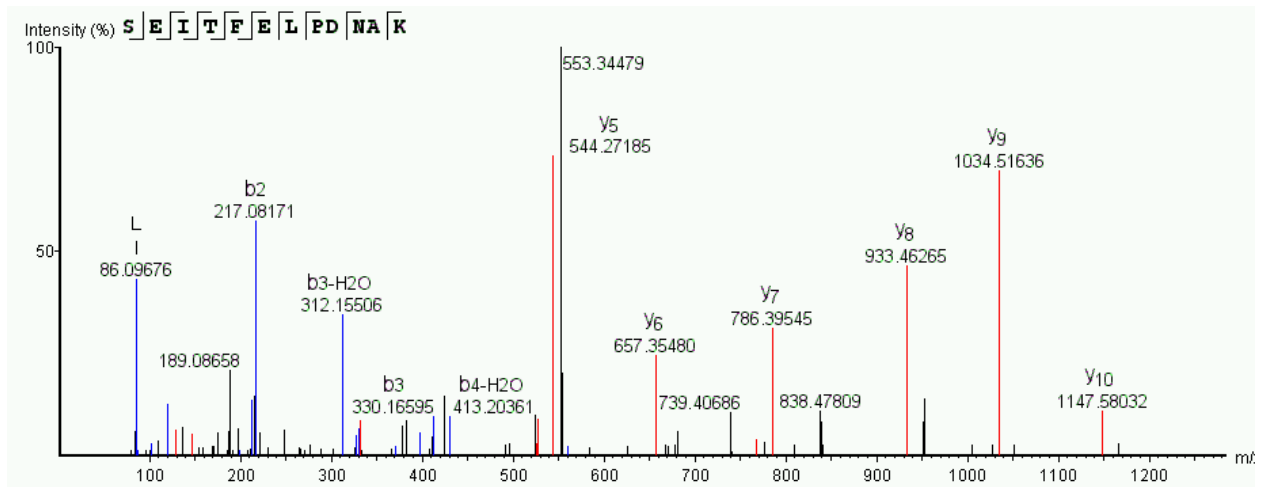

Identified protein:

|Q86XR7-2|TCAM2\_HUMAN Isoform 2 of TIR domain-containing adapter molecule 2

### 3. MS/MS at m/z 625.3075 (2+, RT=35.8162)

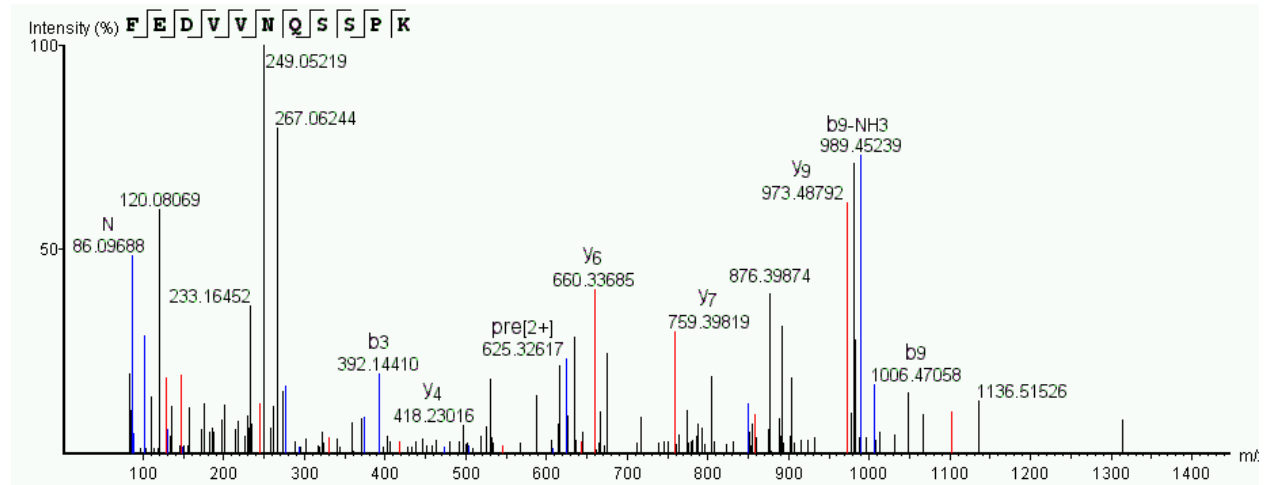

| #  | Immonium  | b          | b-H2O      | b-NH3      | c          | b (2+)    | Seq | y          | y-H2O      | y-NH3      | y (2+)    | #  |
|----|-----------|------------|------------|------------|------------|-----------|-----|------------|------------|------------|-----------|----|
| 1  | 120.08123 | 148.06039  | 130.08655  | 131.04922  | 165.10323  | 74.53812  | F   |            |            |            |           | 11 |
| 2  | 102.05531 | 277.11768  | 259.10825  | 260.09183  | 294.17798  | 139.05940 | E   | 1102.52222 | 1084.52698 | 1085.51050 | 551.76874 | 10 |
| 3  | 88.03955  | 392.14410  | 374.17004  | 375.11877  | 409.17276  | 196.57288 | D   | 973.48792  | 955.48431  | 956.46790  | 487.24744 | 9  |
| 4  | 72.08124  | 491.21417  | 473.20770  | 474.18719  | 508.24118  | 246.10709 | V   | 858.46118  | 840.45734  | 841.44092  | 429.73395 | 8  |
| 5  | 72.08124  | 590.28259  | 572.27203  | 573.25562  | 607.29468  | 295.64130 | V   | 759.39819  | 741.38898  | 742.37256  | 380.19977 | 7  |
| 6  | 87.05579  | 704.32550  | 686.31494  | 687.29852  | 721.35254  | 352.66275 | N   | 660.33685  | 642.32056  | 643.31396  | 330.66556 | 6  |
| 7  | 101.07127 | 832.38409  | 814.37354  | 815.35712  | 849.37012  | 416.69205 | Q   | 546.28394  | 528.27759  | 529.26117  | 273.64407 | 5  |
| 8  | 60.04485  | 919.41614  | 901.40558  | 902.38916  | 936.44318  | 460.20807 | S   | 418.23016  | 400.21902  | 401.20261  | 209.61479 | 4  |
| 9  | 60.04485  | 1006.47058 | 988.43756  | 989.45239  | 1023.47510 | 503.73956 | S   | 331.19666  | 313.18701  | 314.17059  | 166.09879 | 3  |
| 10 | 70.06558  | 1103.50085 | 1085.49036 | 1086.47388 | 1120.52783 | 552.25043 | P   | 244.16422  | 226.15498  | 227.13853  | 122.58277 | 2  |
| 11 | 101.10778 |            |            |            |            |           | K   | 147.11227  | 129.10213  | 130.08655  | 74.05640  | 1  |

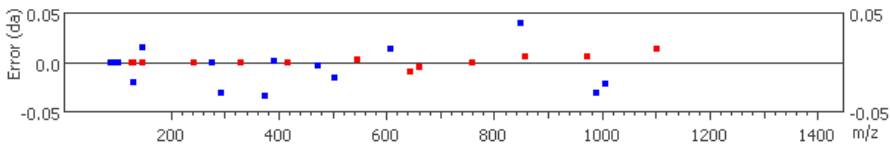

Identified protein:

|Q01085|TIAR\_HUMAN Nucleolysin TIAR

#### 4. MS/MS at m/z 608.28754 (2+, RT=34.4375)

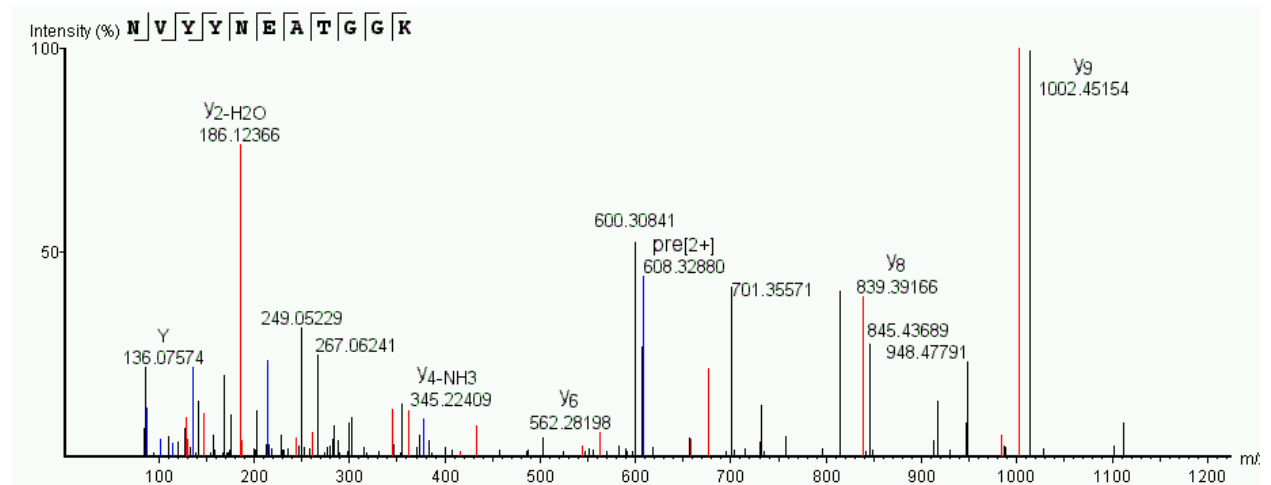

Identified protein:

|P68371|TBB4B\_HUMAN Tubulin beta-4B chain

### 5. MS/MS at $m/z$ 621.95435 (3+, RT=49.0288)

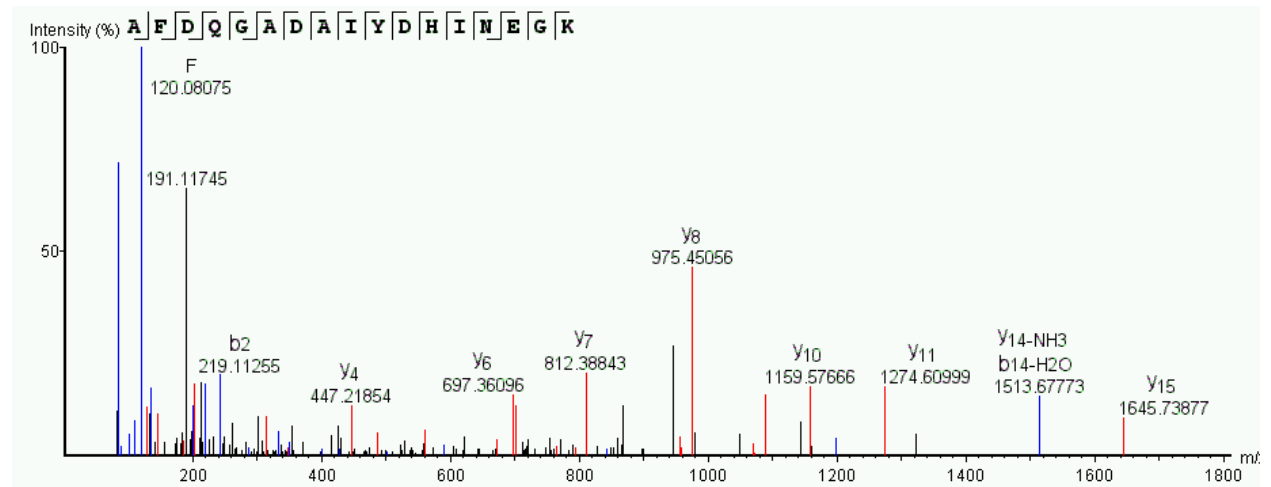

Identified protein

|Q9UDW1|QCR9\_HUMAN Cytochrome b-c1 complex subunit 9

## 6. MS/MS at m/z (2+, RT=20.7864)

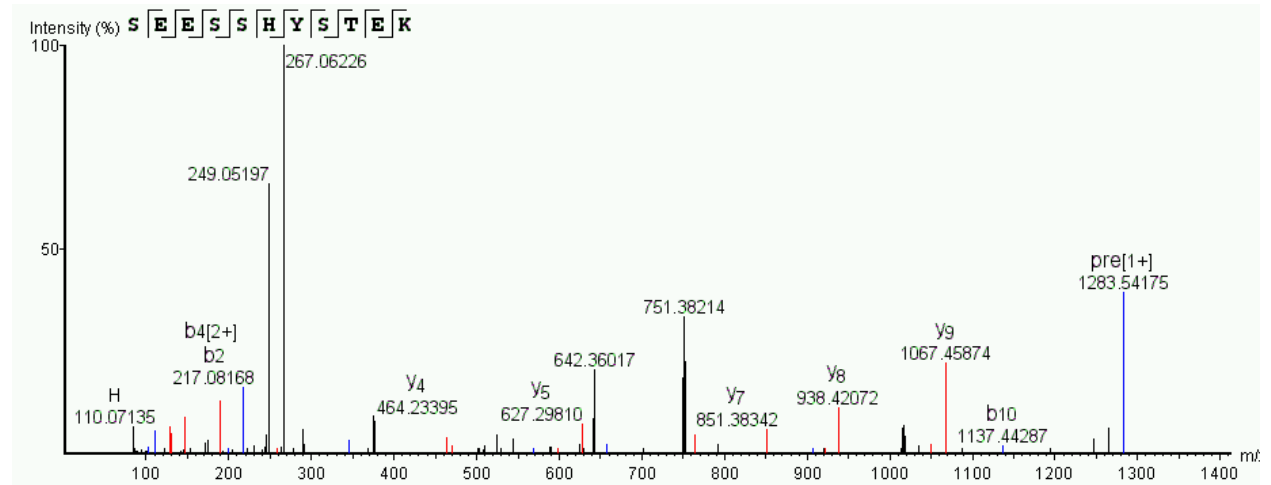

Identified protein:

|P55265-5|DSRAD\_HUMAN Isoform 5 of Double-stranded RNA-specific adenosine deaminase

### 7. MS/MS at m/z 517.74866 (2+, RT=37.2314)

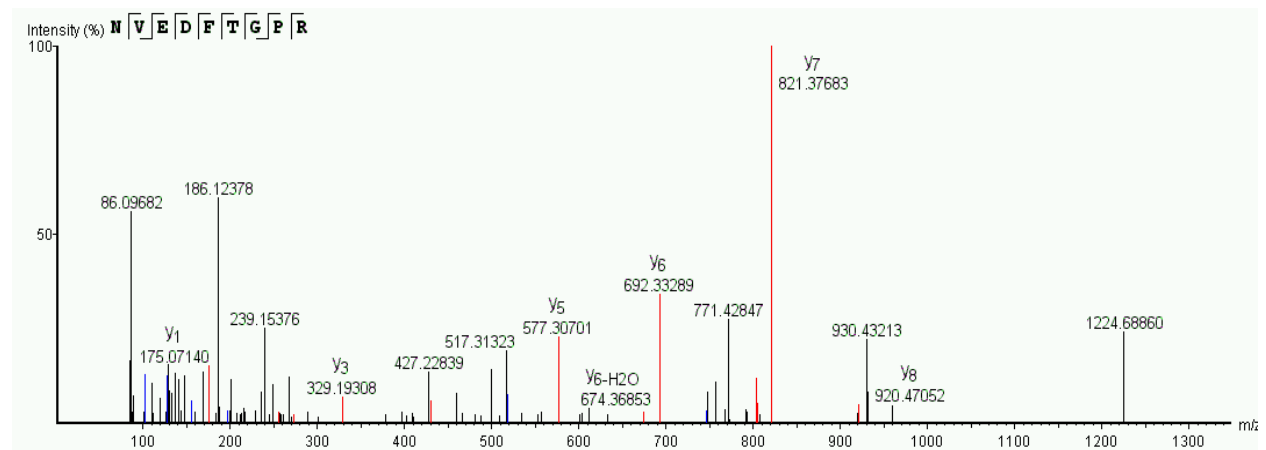

Identified protein:

|P61009|SPCS3\_HUMAN Signal peptidase complex subunit 3



### 8. MS/MS at m/z 642.82635 (2+, RT=53.0257)

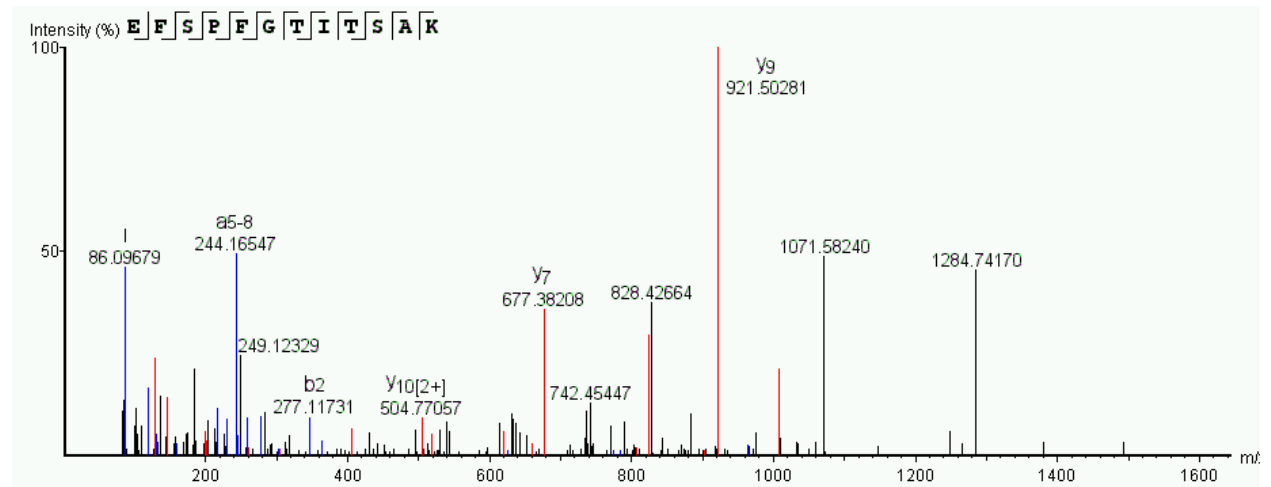

Identified protein:

|A0A087WTT1| PABPC1\_HUMAN Polyadenylate-binding protein 1

### 9. MS/MS at m/z 713.0714 (3+, RT=77.0785)

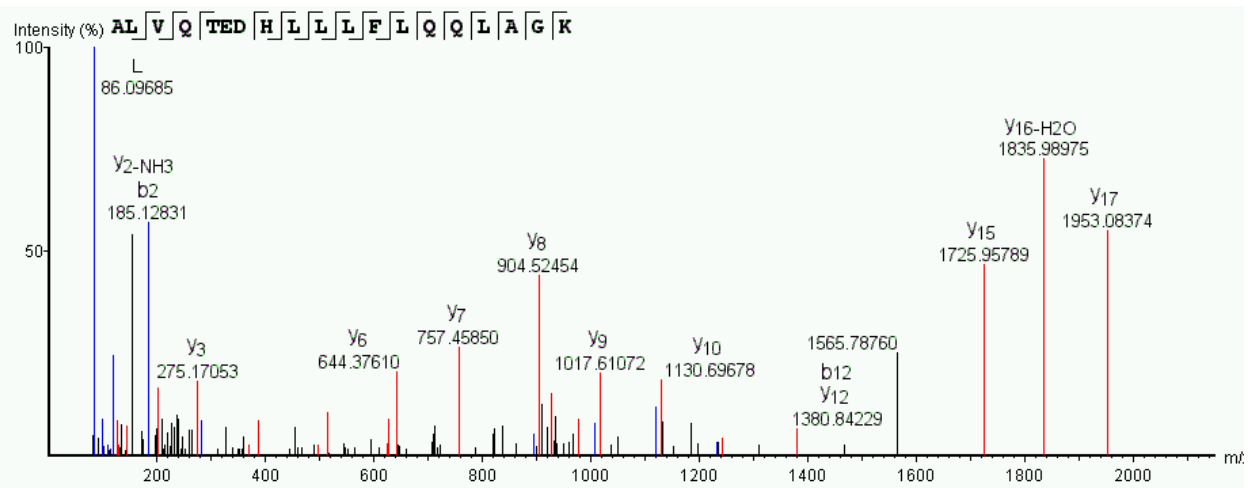

Identified protein:

|Q8N766-4|EMC1\_HUMAN Isoform 4 of ER membrane protein complex subunit 1

### 10. MS/MS at $m/z$ 505.25842 (2+, RT=26.2344)

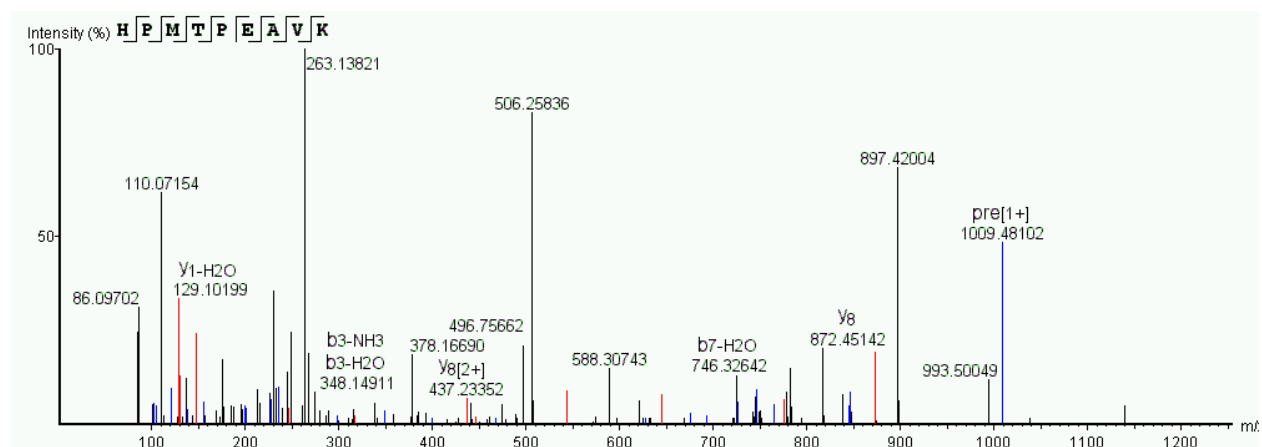

| # | Immonium  | b         | b-H2O     | b-NH3     | c         | b (2+)    | Seq | y         | y-H2O     | y-NH3     | y (2+)    | # |
|---|-----------|-----------|-----------|-----------|-----------|-----------|-----|-----------|-----------|-----------|-----------|---|
| 1 | 110.07174 | 138.05446 | 120.08096 | 121.03974 | 155.08087 | 69.53337  | H   |           |           |           |           | 9 |
| 2 | 70.06558  | 235.11917 | 217.10893 | 218.09248 | 252.14648 | 118.05975 | P   | 872.45142 | 854.44403 | 855.42761 | 436.73102 | 8 |
| 3 | 104.05287 | 366.15997 | 348.14911 | 349.15100 | 383.18698 | 183.57999 | M   | 775.39789 | 757.39130 | 758.37488 | 388.20093 | 7 |
| 4 | 74.06051  | 467.20157 | 449.19711 | 450.18069 | 484.23468 | 234.10384 | T   | 644.35547 | 626.35077 | 627.33435 | 322.68066 | 6 |
| 5 | 70.06558  | 564.26044 | 546.24988 | 547.23346 | 581.28748 | 282.63022 | P   | 543.31299 | 525.30310 | 526.28668 | 272.15683 | 5 |
| 6 | 102.05559 | 693.29999 | 675.28589 | 676.27600 | 710.33002 | 347.15149 | E   | 446.27200 | 428.25034 | 429.23392 | 223.63045 | 4 |
| 7 | 44.04993  | 764.34271 | 746.32642 | 747.31311 | 781.36713 | 382.67004 | A   | 317.21738 | 299.20773 | 300.19131 | 159.10915 | 3 |
| 8 | 72.08124  | 863.40851 | 845.39661 | 846.39905 | 880.43555 | 432.20425 | V   | 246.18047 | 228.17064 | 229.15419 | 123.59060 | 2 |
| 9 | 101.10778 |           |           |           |           |           | K   | 147.11249 | 129.10199 | 130.08614 | 74.05640  | 1 |

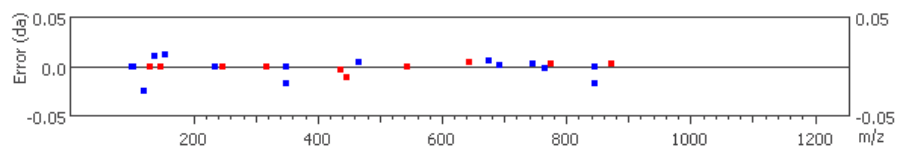

Identified protein:

|E7EWE5|HSD17B4\_HUMAN Peroxisomal multifunctional enzyme type 2

11. MS/MS at  $m/z$  922.46387 (2+, RT=77.5136)

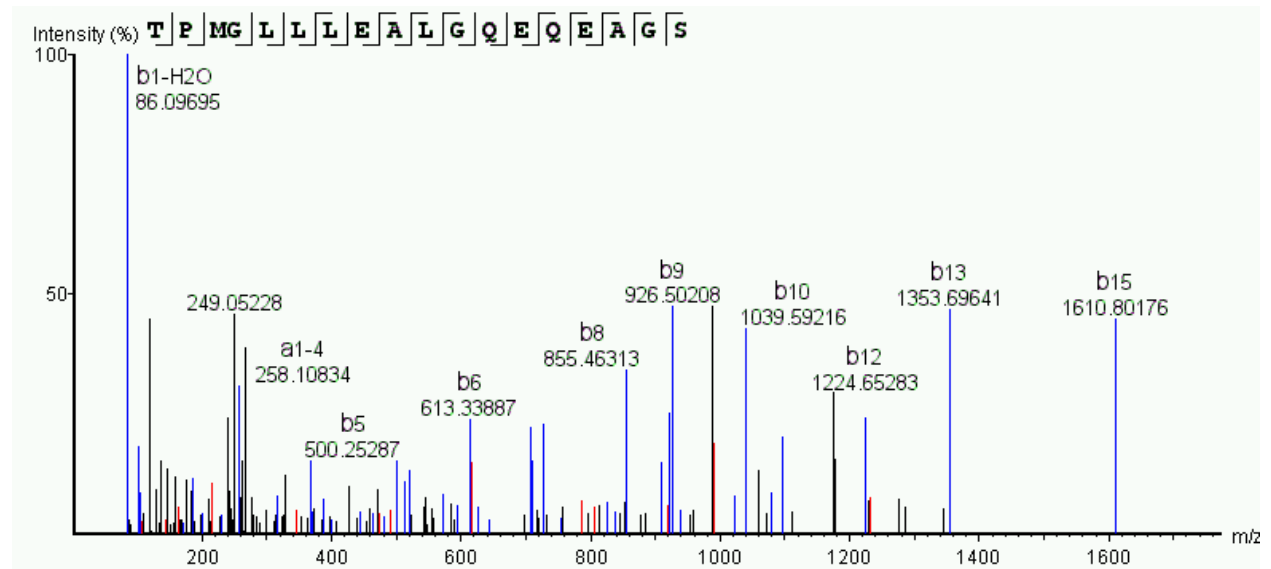

Identified protein:

|O60831|PRAF2\_HUMAN PRA1 family protein 2

## 12. MS/MS at m/z 357.7106 (2+, RT=17.6151)

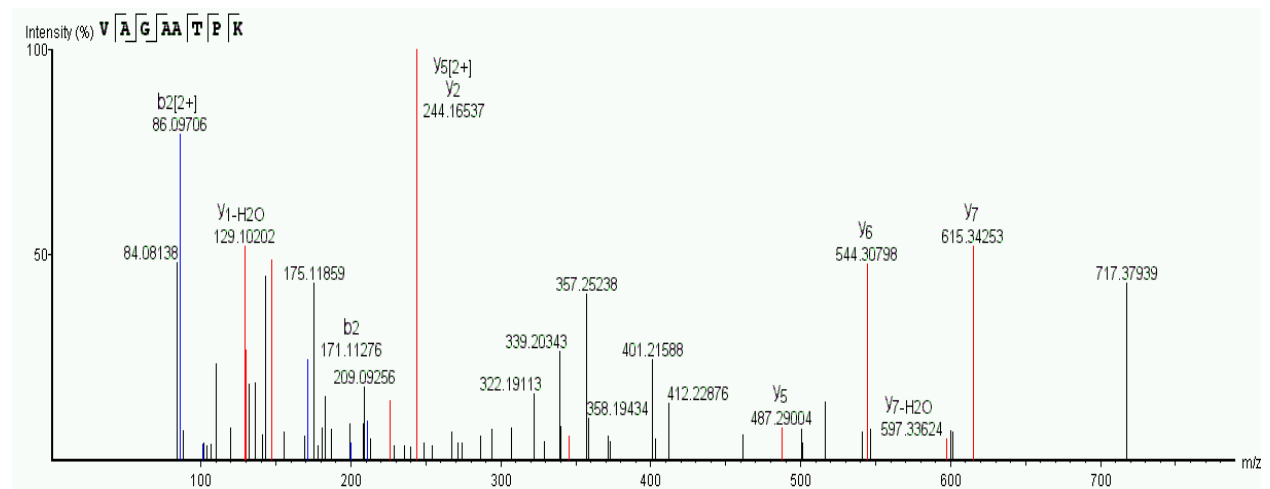

Identified protein

|P16402|H13\_HUMAN Histone H1.3

### 13. MS/MS at $m/z$ 462.22717 (2+, RT=30.9703)

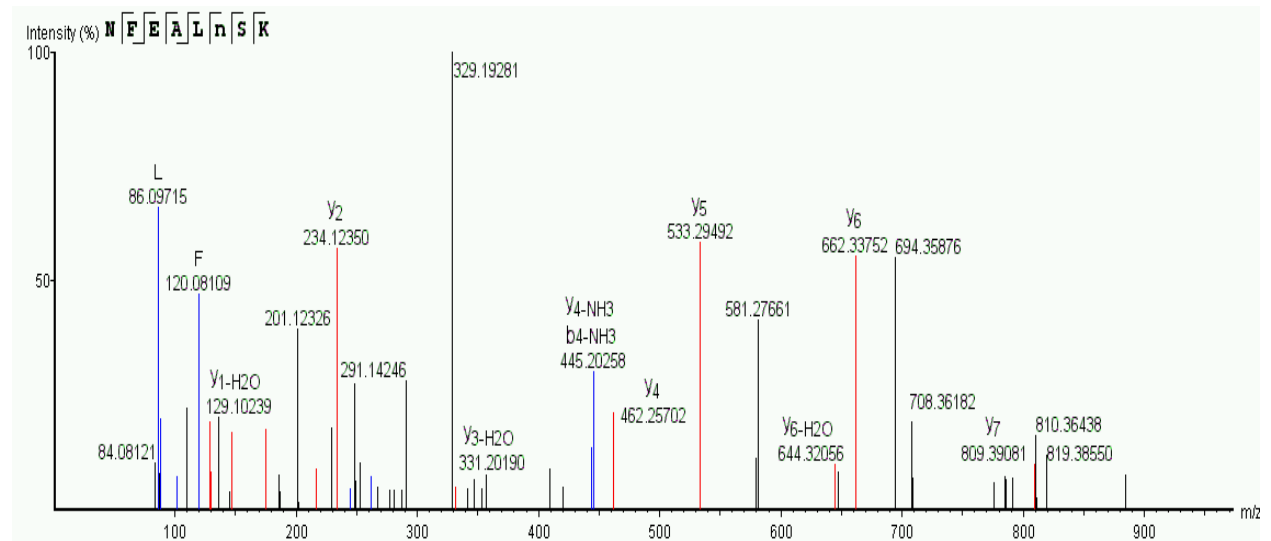

Identified protein:

|K7EMY3|CHD5\_HUMAN Chromodomain-helicase-DNA-binding protein 5 (Fragment)

**14. MS/MS at m/z 609.3177 (2+, RT=39.7965)**

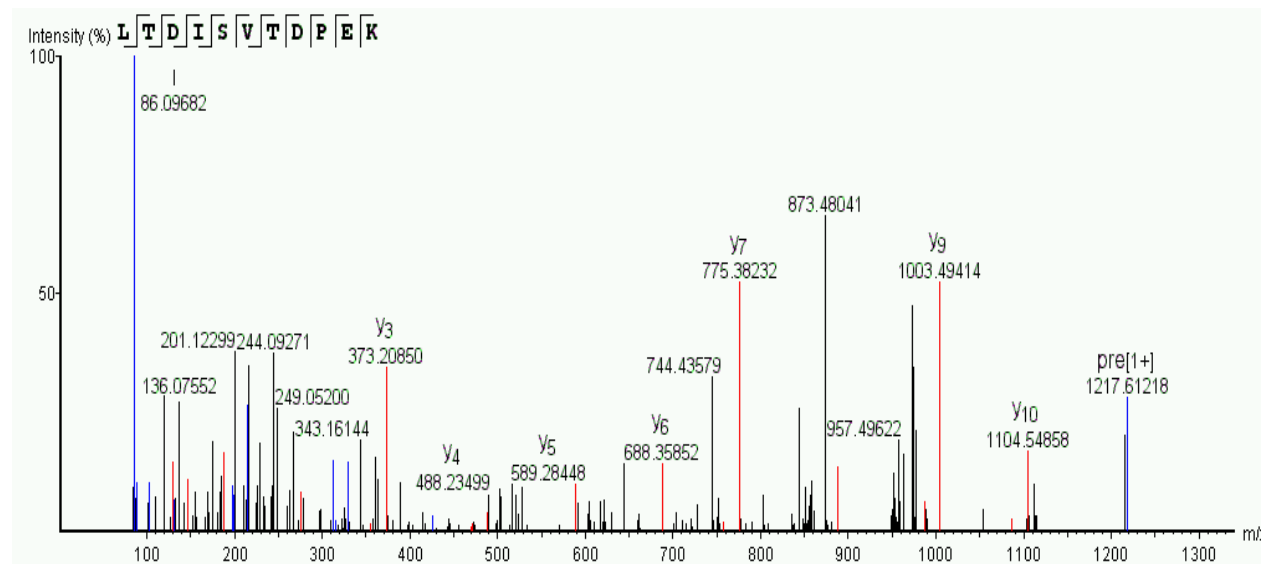

Identified protein:

|Q9Y333|LSM2\_HUMAN U6 snRNA-associated Sm-like protein LSM2 OS=Homo sapiens

15. MS/MS of precursor ion at  $m/z$  359.21036 (2+, RT=28.0345)

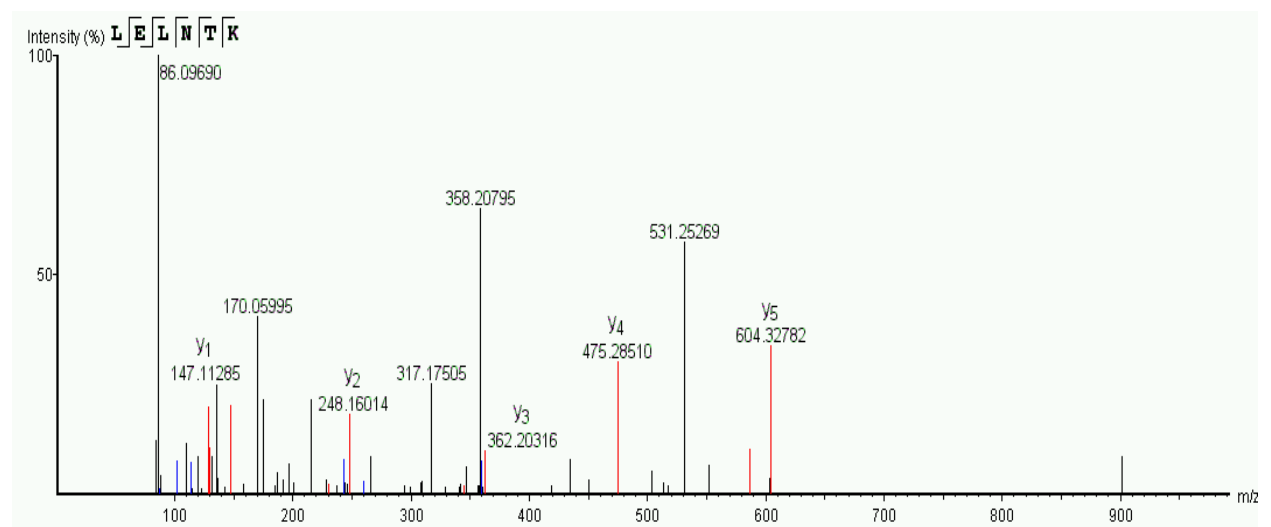

Identified Protein:

|Q9H1H9-4|KI13A\_HUMAN



16. MS/MS at  $m/z$  640.31177 (2+, RT=28.8334)

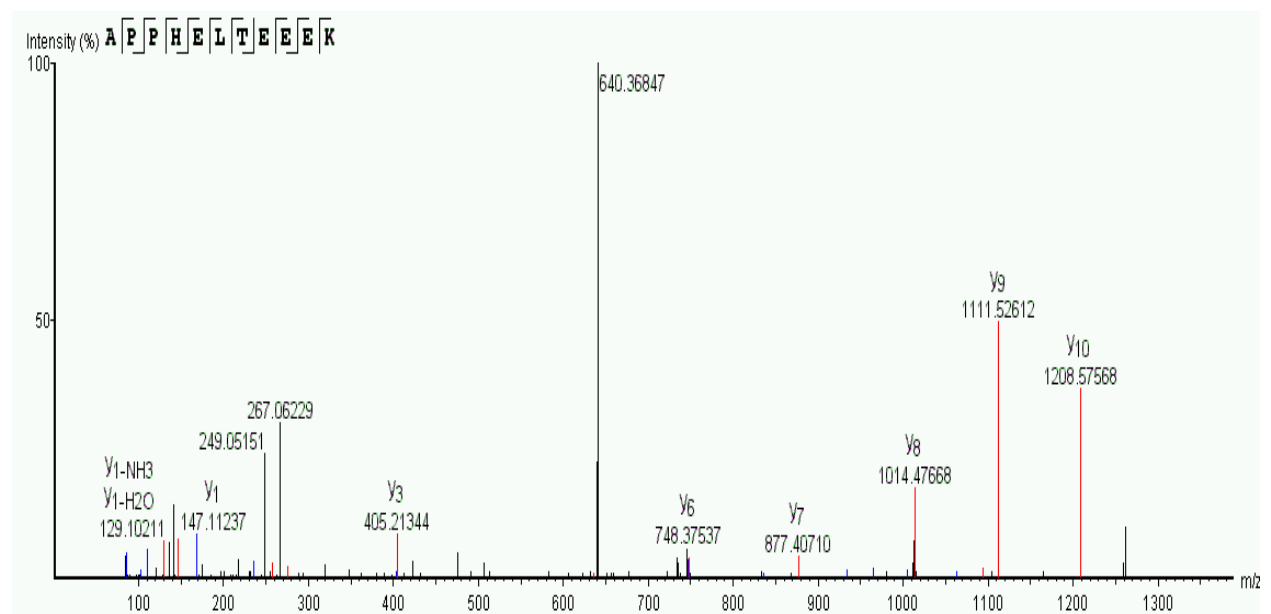

Identified protein:

|Q13409-6|DC112\_HUMAN Isoform 2F of Cytoplasmic dynein 1 intermediate chain 2

**17. MS/MS at m/z 568.3231 (2+, RT=46.9868)**

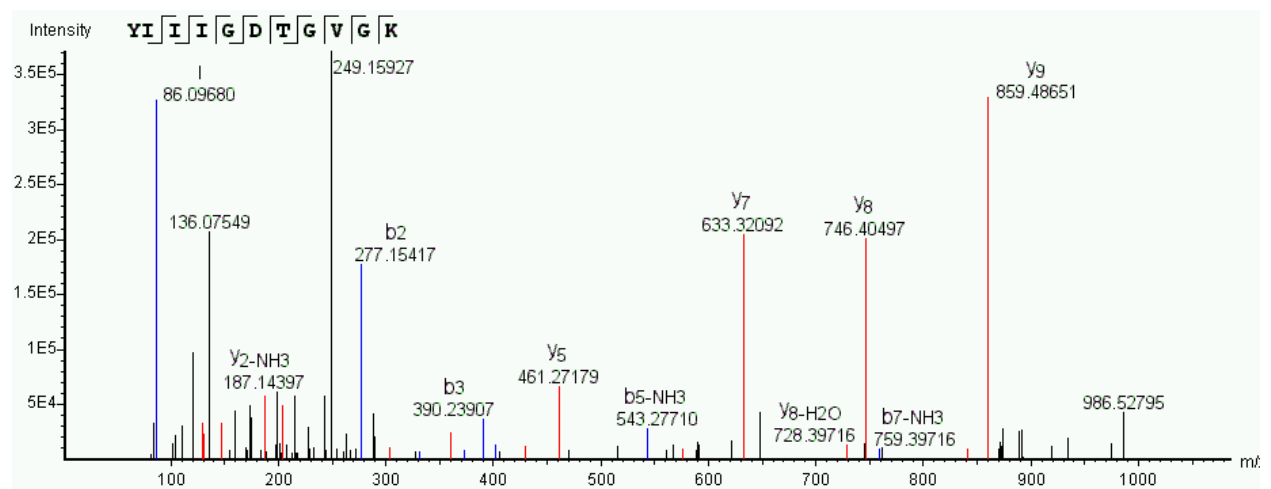

Identified protein:

|P61019|RAB2A\_HUMAN Ras-related protein Rab-2A

18. MS/MS at  $m/z$  806.3782 (2+, RT=46.5239)

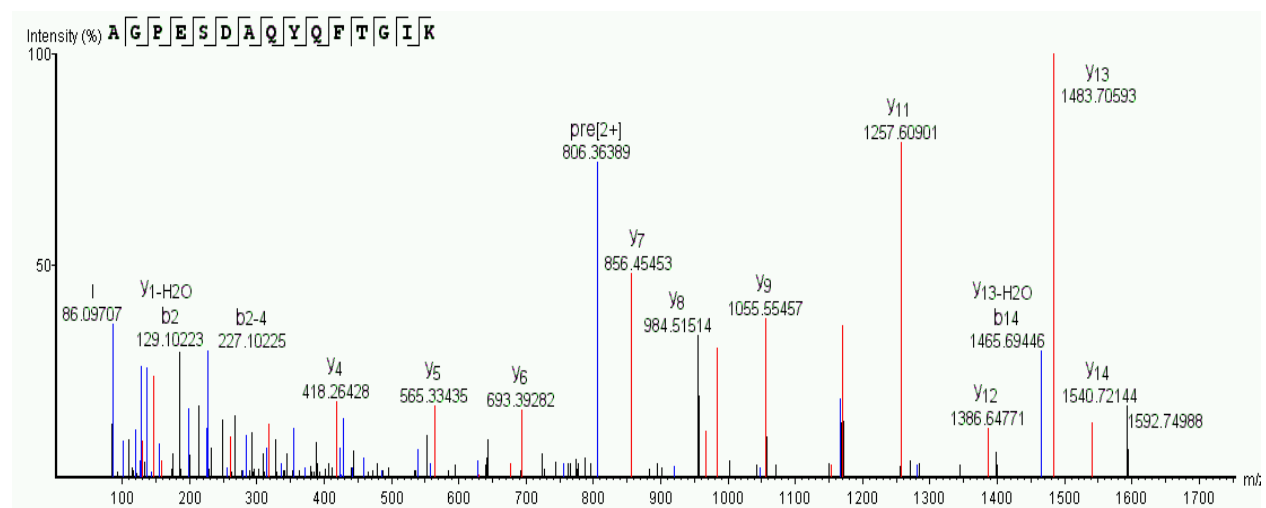

Identified protein:

|Q96IX5|USMG5\_HUMAN Up-regulated during skeletal muscle growth protein 5

**19. MS/MS at 474.23987 (3+, RT=44.9066)**

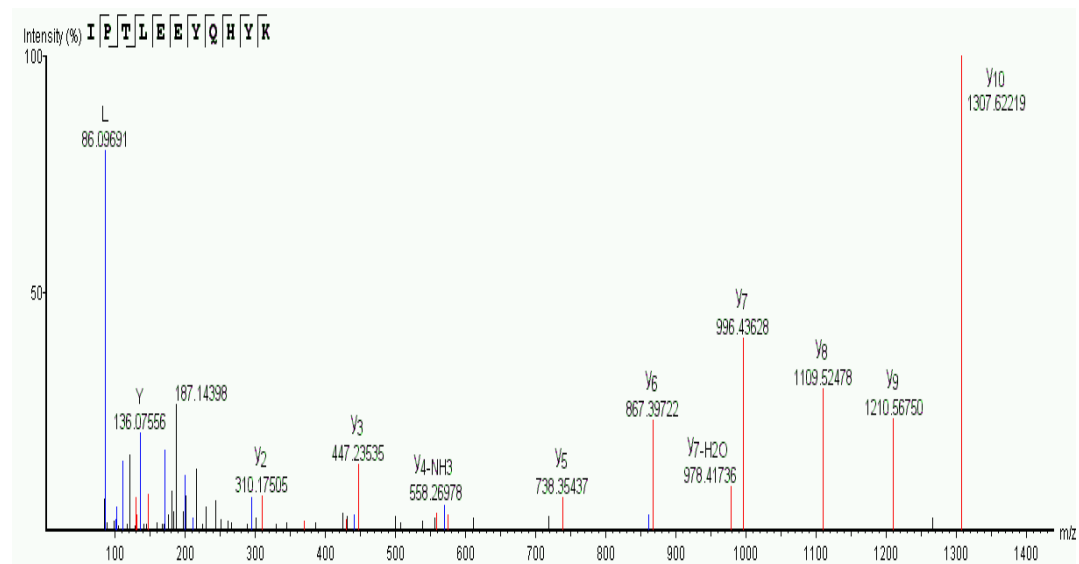

Identified protein:

|P61978-3|HNRPK\_HUMAN Isoform 3 of Heterogeneous nuclear ribonucleoprotein K

**20. MS/MS at m/z 663.8967 (2+, RT=66.0221)**

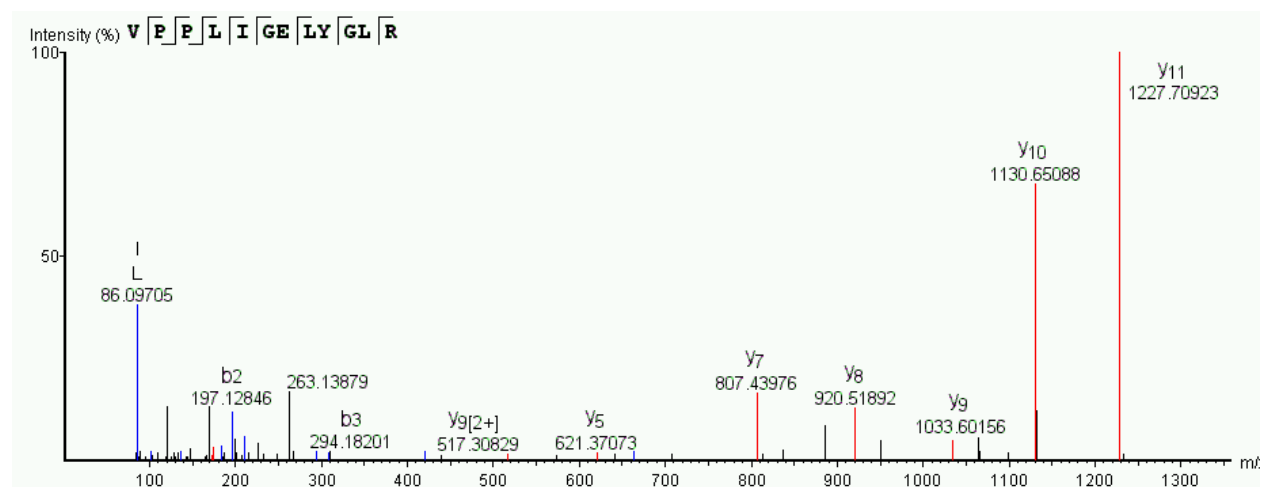

Identified protein:

|Q9P0J0|NDUAD\_HUMAN NADH dehydrogenase [ubiquinone] 1 alpha subcomplex subunit 13

## 21. MS/MS at m/z 812.40515 (2+, RT=57.4447)

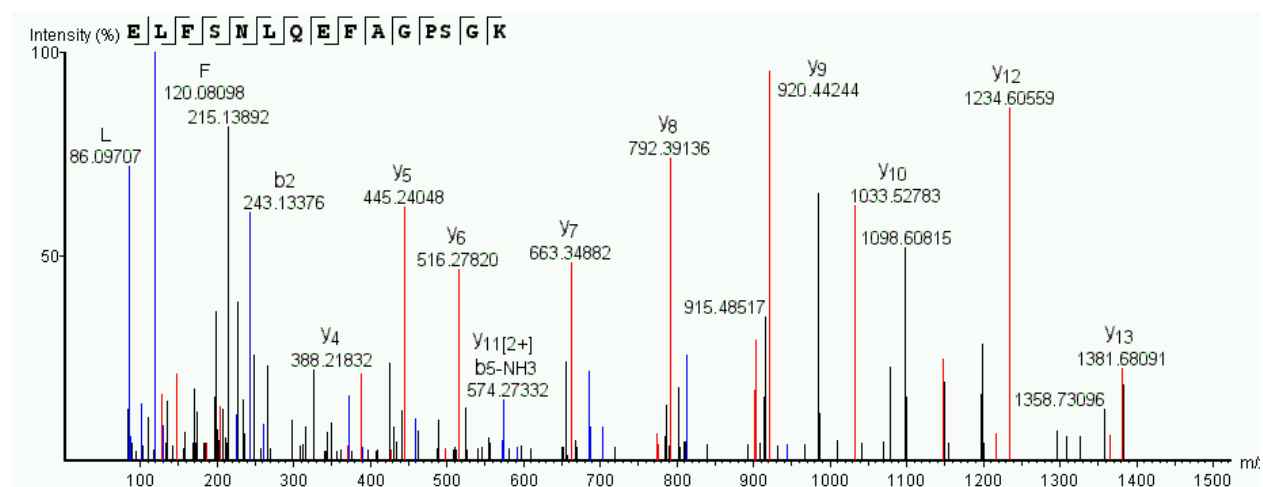

Identified protein:

|F8VQX6|METTL7A\_HUMAN Methyltransferase-like protein 7A (Fragment) OS=Homo sapiens GN=PE=1 SV=1

## 22. MS/MS at m/z 535.7413 (2+, RT=22.9191)

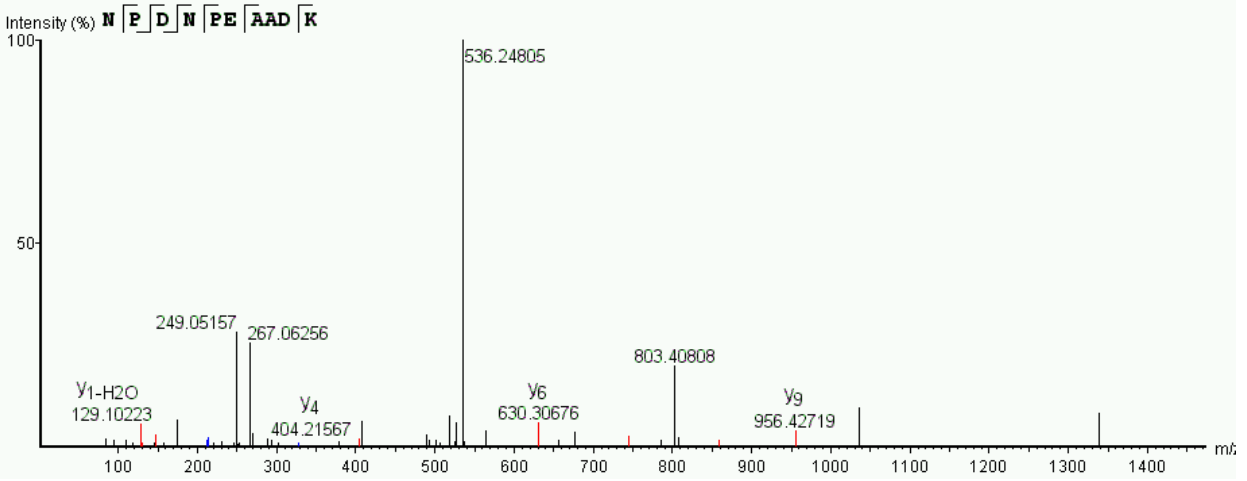

| #  | Immonium  | b                         | b-H2O     | b-NH3     | c         | b (2+)    | Seq | y                         | y-H2O                     | y-NH3                     | y (2+)    | #  |
|----|-----------|---------------------------|-----------|-----------|-----------|-----------|-----|---------------------------|---------------------------|---------------------------|-----------|----|
| 1  | 87.05576  | 115.05076                 | 97.04020  | 98.02376  | 132.07776 | 58.02538  | N   |                           |                           |                           |           | 10 |
| 2  | 70.06558  | <a href="#">212.10287</a> | 194.09296 | 195.07651 | 229.13051 | 106.55176 | P   | <a href="#">956.42719</a> | 938.42133                 | 939.40491                 | 478.71594 | 9  |
| 3  | 88.03976  | <a href="#">327.12784</a> | 309.11987 | 310.10345 | 344.15744 | 164.06522 | D   | <a href="#">859.37622</a> | 841.36859                 | 842.35217                 | 430.18958 | 8  |
| 4  | 87.05576  | 441.17337                 | 423.16281 | 424.14639 | 458.20038 | 221.08669 | N   | <a href="#">744.35016</a> | 726.34167                 | 727.32526                 | 372.67612 | 7  |
| 5  | 70.06558  | 538.22614                 | 520.21558 | 521.19916 | 555.25317 | 269.61307 | P   | <a href="#">630.30676</a> | 612.29871                 | 613.28229                 | 315.65463 | 6  |
| 6  | 102.05541 | 667.26874                 | 649.25818 | 650.24176 | 684.29578 | 334.13437 | E   | 533.25653                 | 515.24597                 | 516.22955                 | 267.12827 | 5  |
| 7  | 44.04993  | 738.30585                 | 720.29529 | 721.27887 | 755.33289 | 369.65292 | A   | <a href="#">404.21567</a> | 386.20337                 | 387.18695                 | 202.60696 | 4  |
| 8  | 44.04993  | 809.34296                 | 791.33240 | 792.31598 | 826.37000 | 405.17148 | A   | 333.17682                 | 315.16626                 | 316.14984                 | 167.08841 | 3  |
| 9  | 88.03976  | 924.36987                 | 906.35931 | 907.34290 | 941.39691 | 462.68494 | D   | 262.13971                 | 244.12917                 | 245.11272                 | 131.56985 | 2  |
| 10 | 101.10778 |                           |           |           |           |           | K   | <a href="#">147.11246</a> | <a href="#">129.10223</a> | <a href="#">130.08585</a> | 74.05640  | 1  |

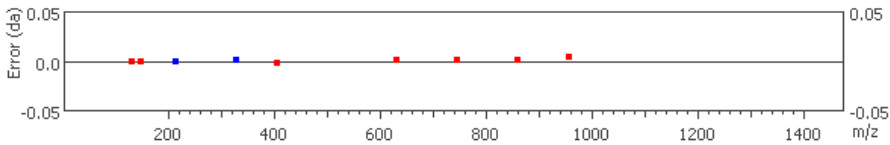

Identified protein:

[Q9H3Z4-2] DNJC5\_HUMAN Isoform 2 of DnaJ homolog subfamily C member 5

**23. MS/MS at  $m/z$  724.4534 (2+, RT=69.7751)**

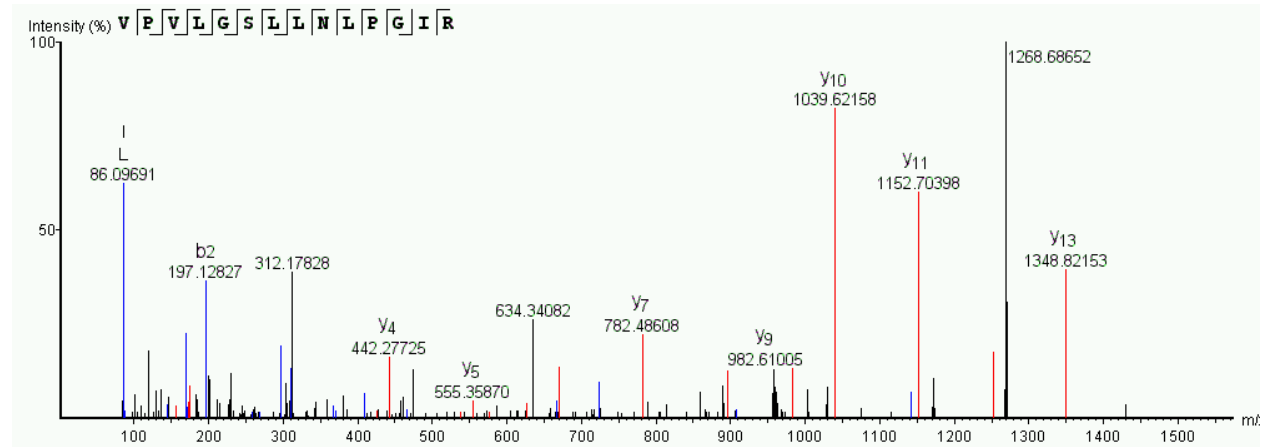

Identified protein:

|G3V1U5|GOLT1B\_HUMAN Golgi transport 1 homolog B (S. cerevisiae), isoform CRA\_c



24. MS/MS at m/z 582.63007 (3+, RT=49.4318)

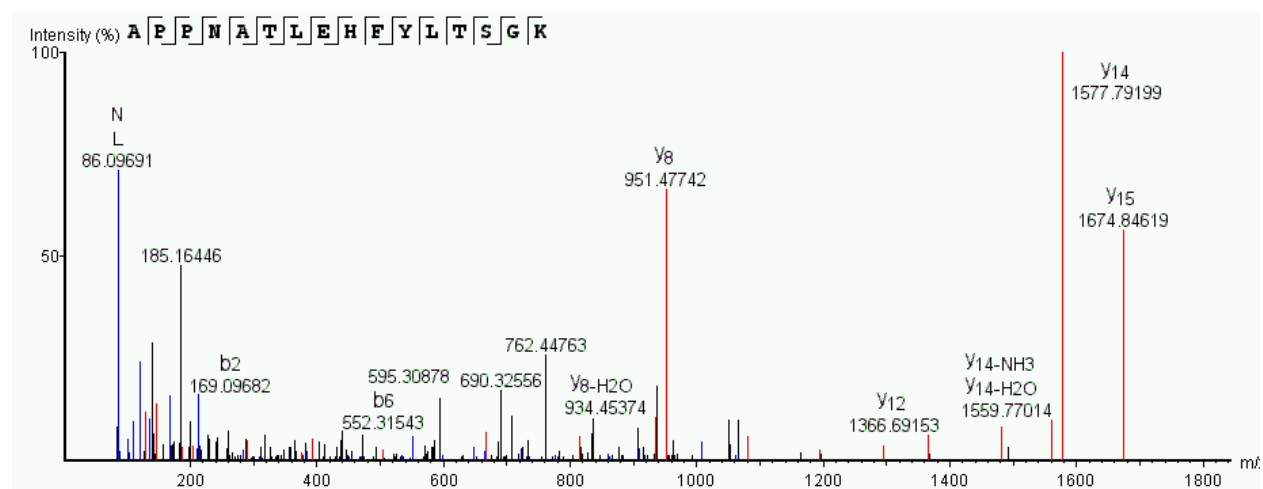

Identified protein:

[H0YNU7] CERS2\_HUMAN Ceramide synthase 2 OS=Homo sapiens GN= PE=1 SV=2

25. MS/MS at m/z 967.17175 (3+, RT=73.6381)

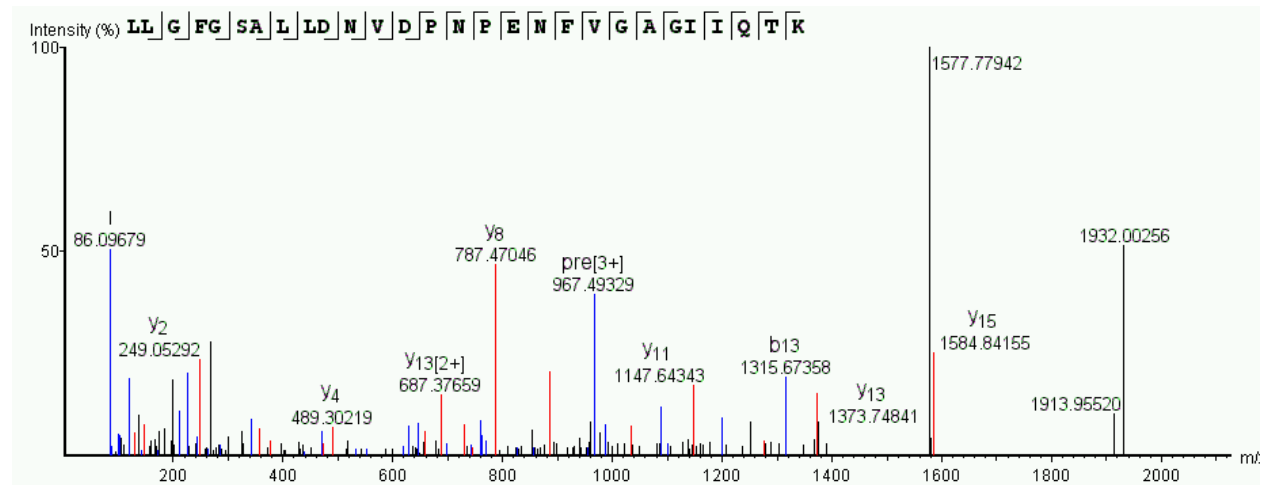

Identified protein:

|O95782-2|AP2A1\_HUMAN Isoform B of AP-2 complex subunit alpha-1

26. MS/MS at m/z 702.41125 (2+, RT=72.2845)

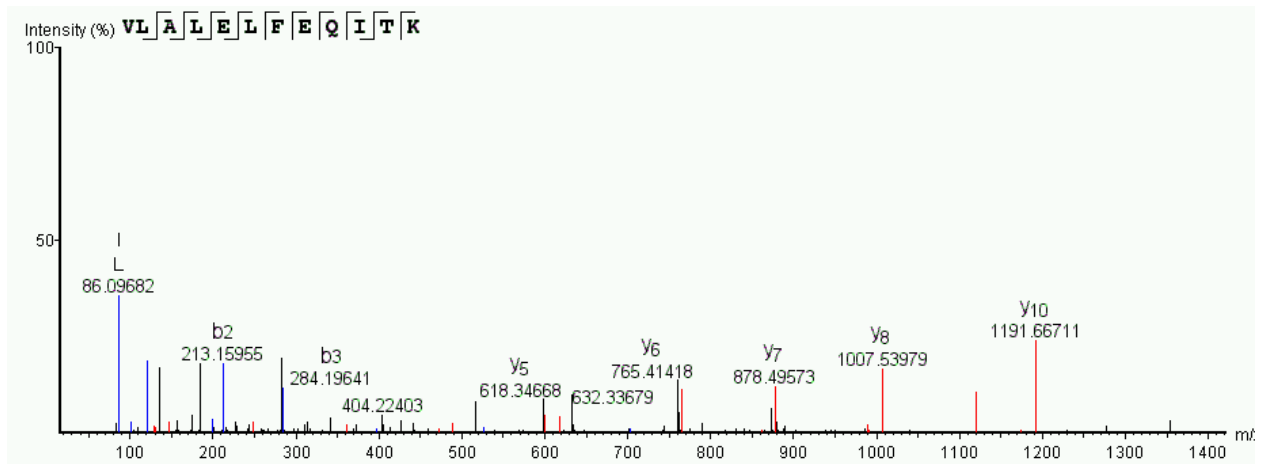

|P19525-2|E2AK2\_HUMAN Isoform 2 of Interferon-induced, double-stranded RNA-activated protein kinase

27. MS/MS at m/z 510.25418 (2+, RT=24.0974)

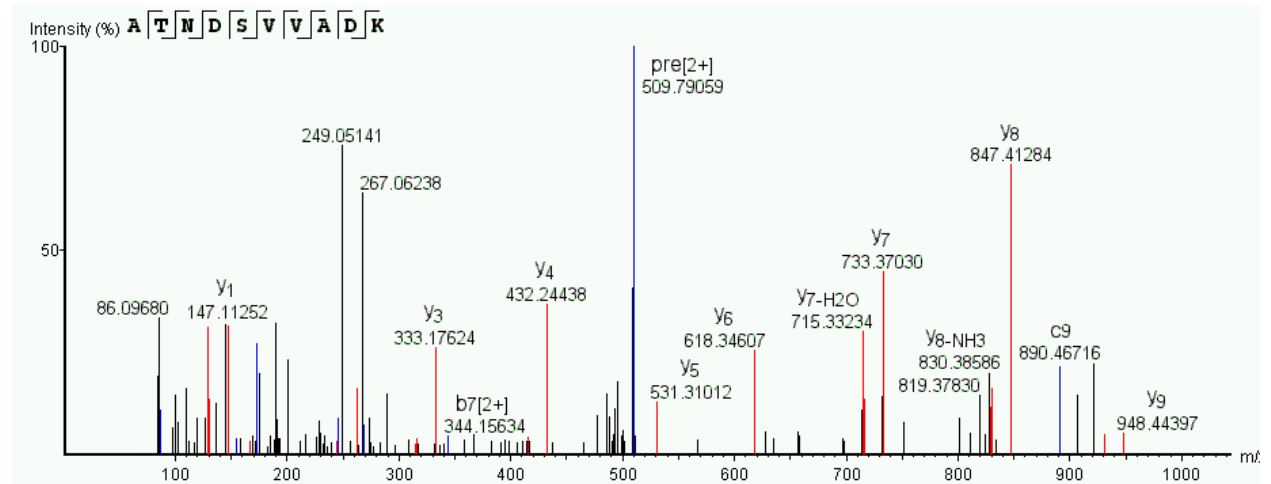

Identified protein:

|P40306|PSB10\_HUMAN Proteasome subunit beta type-10

28. MS/MS at m/z 401.72446 (2+, RT=22.199)

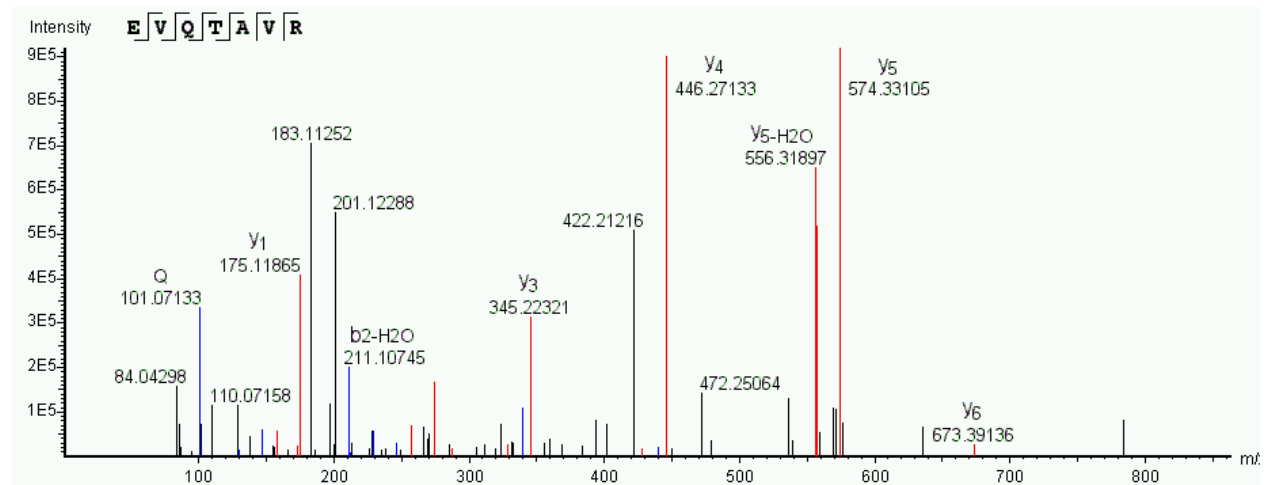

Identified protein:

|Q8N257|H2B3B\_HUMAN Histone H2B type 3-B

29. MS/MS at m/z 612.28015 (2+, RT=33.3965)

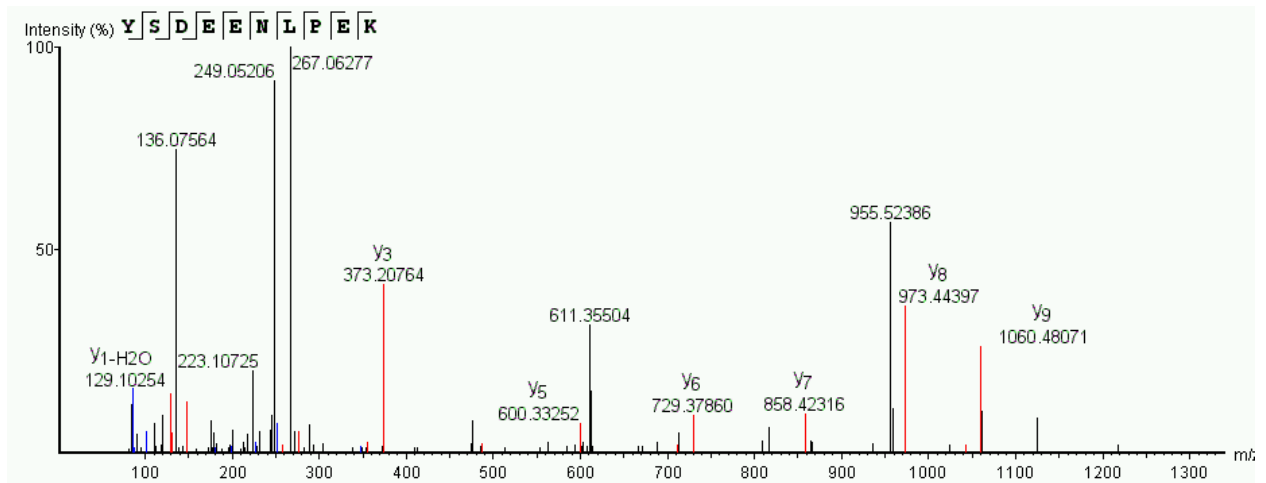

Identified protein:

|Q9BQI0-2|AIF1L\_HUMAN Isoform 2 of Allograft inflammatory factor 1-like

### 30. MS/MS at m/z 870.43335 (2+, RT=80.521)

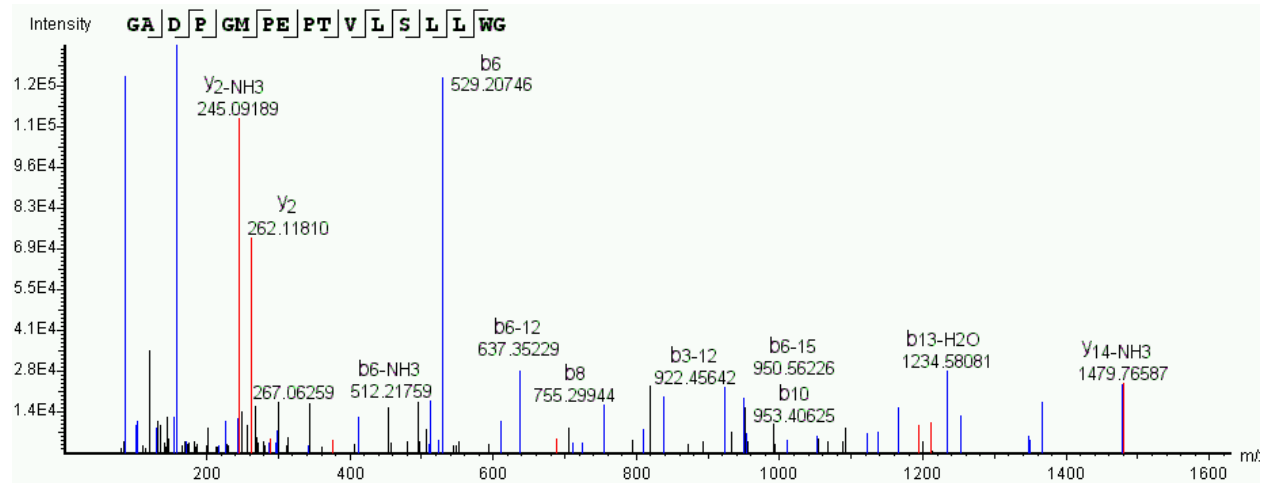

Identified protein:

|Q9P0U1|TOM7\_HUMAN Mitochondrial import receptor subunit TOM7 homolog OS=Homo sapiens  
GN=TOMM7 PE=1 SV=1

**31. MS/MS at  $m/z$  758.90814 (2+, RT=64.1807)**

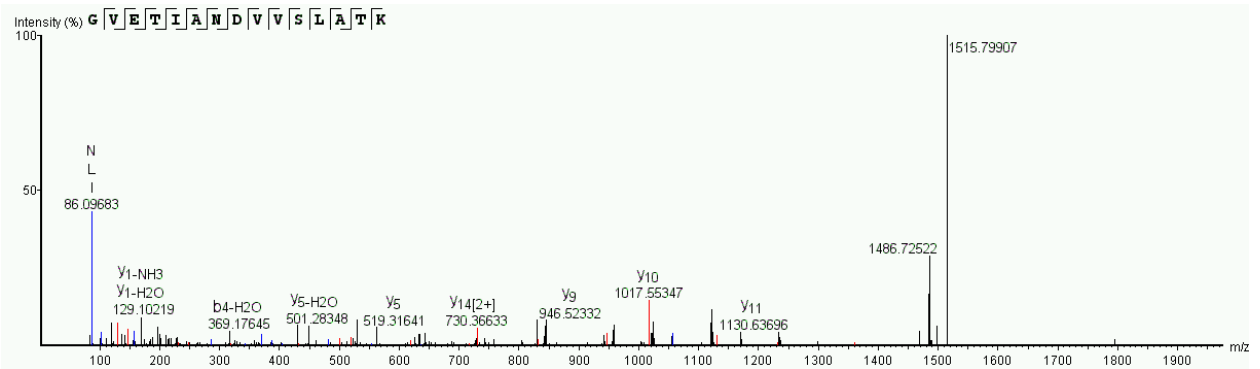

Identified protein:

|H0YDD4|DLAT\_HUMAN Acetyltransferase component of pyruvate dehydrogenase complex (Fragment)



### 32. MS/MS at $m/z$ 682.34973 (3+, RT=64.4809)

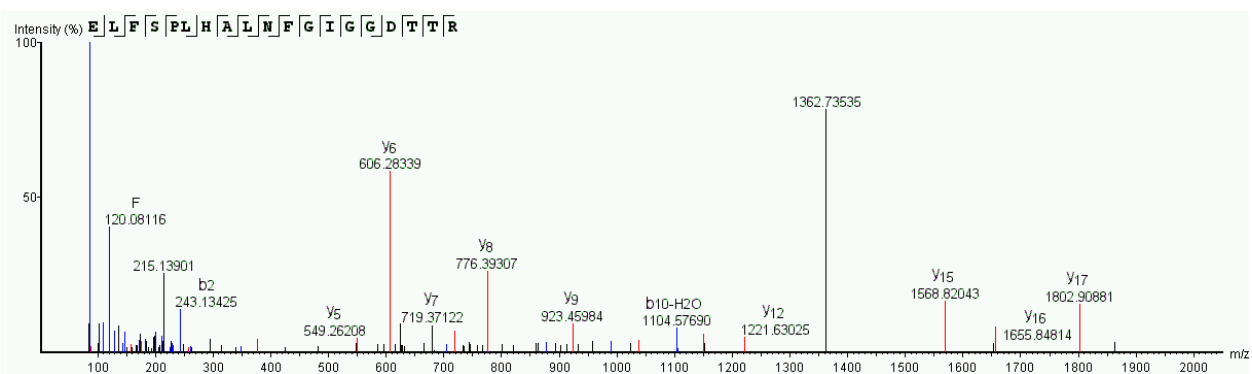

Identified protein:

|P68402|PA1B2\_HUMAN Platelet-activating factor acetylhydrolase IB subunit beta

**33. MS/MS at m/z 446.23206 (2+, RT=33.8334)**

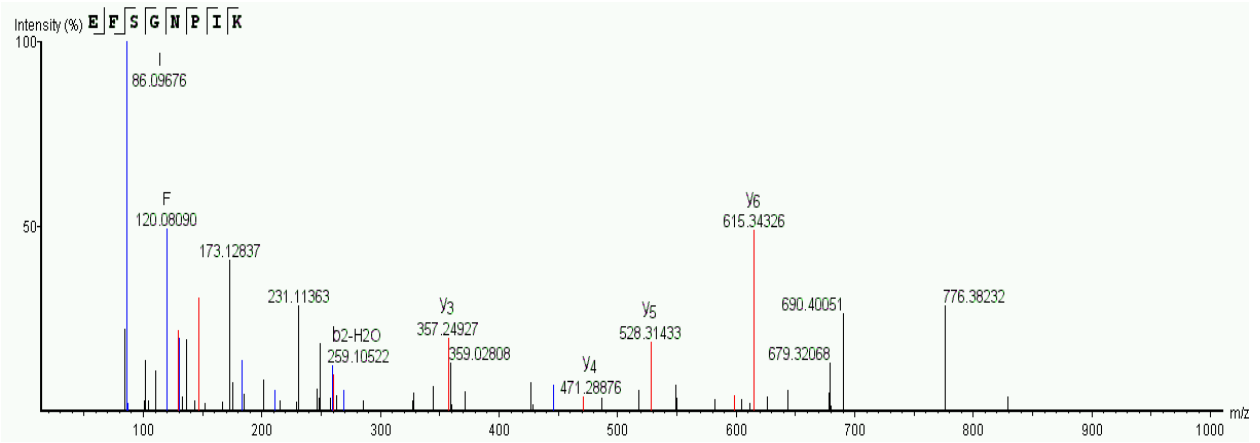

Identified protein:

|P35637-2|FUS\_HUMAN Isoform Short of RNA-binding protein FUS

**34. MS/MS at m/z 838.9351 (2+, RT=66.4146)**

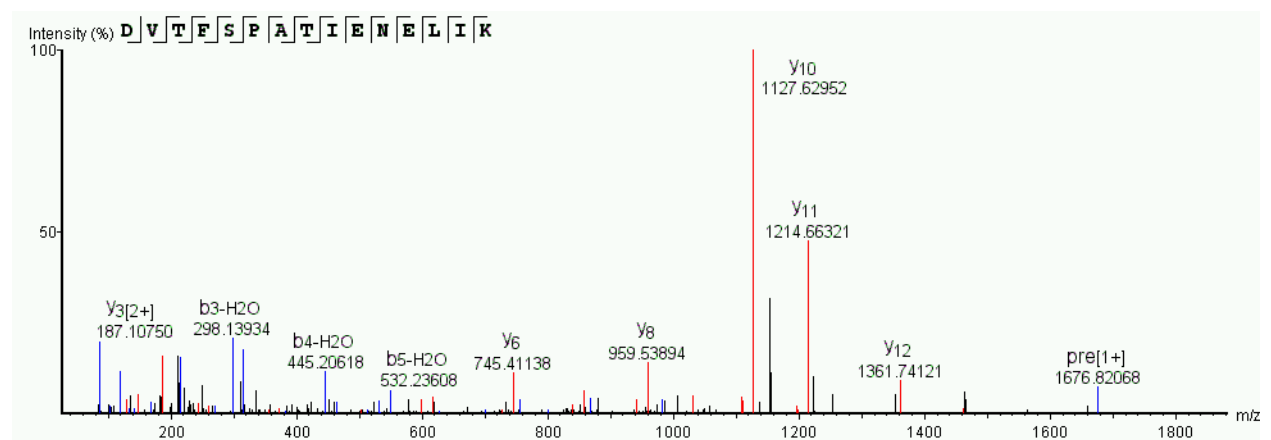

Identified protein:

|P55145|MANF\_HUMAN Mesencephalic astrocyte-derived neurotrophic factor

**35. MS/MS at m/z 809.8797 (2+, RT=62.292 )**

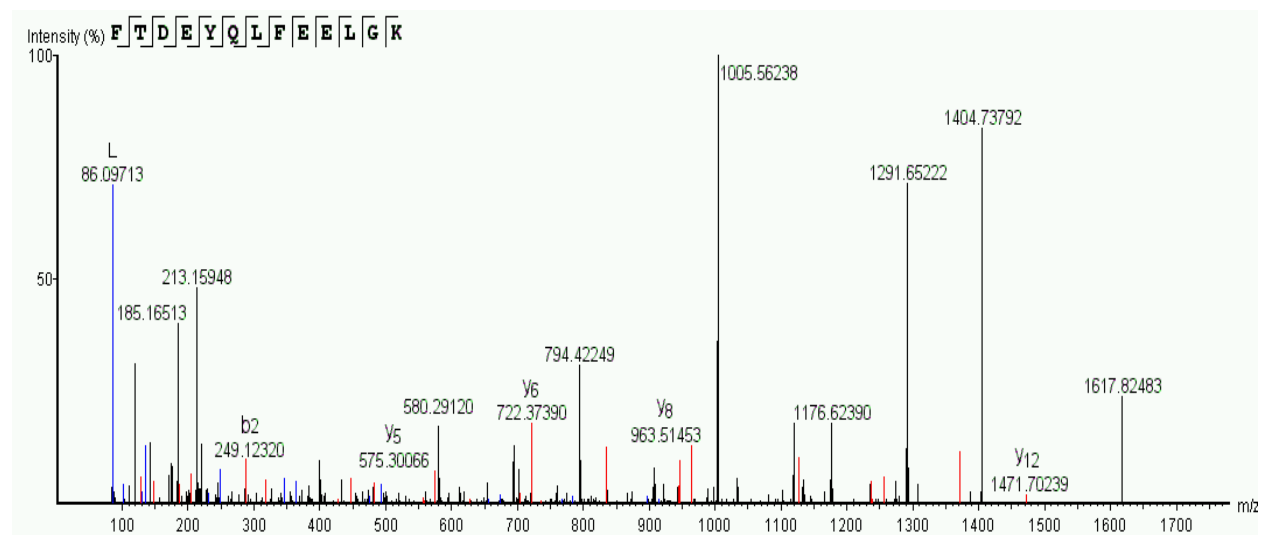

Identified protein:

|Q13557-12|KCC2D\_HUMAN, Coeluted with 213-I/LGDSP

**36. MS/MS at  $m/z$  935.8058 (3+, RT=80.8872)**

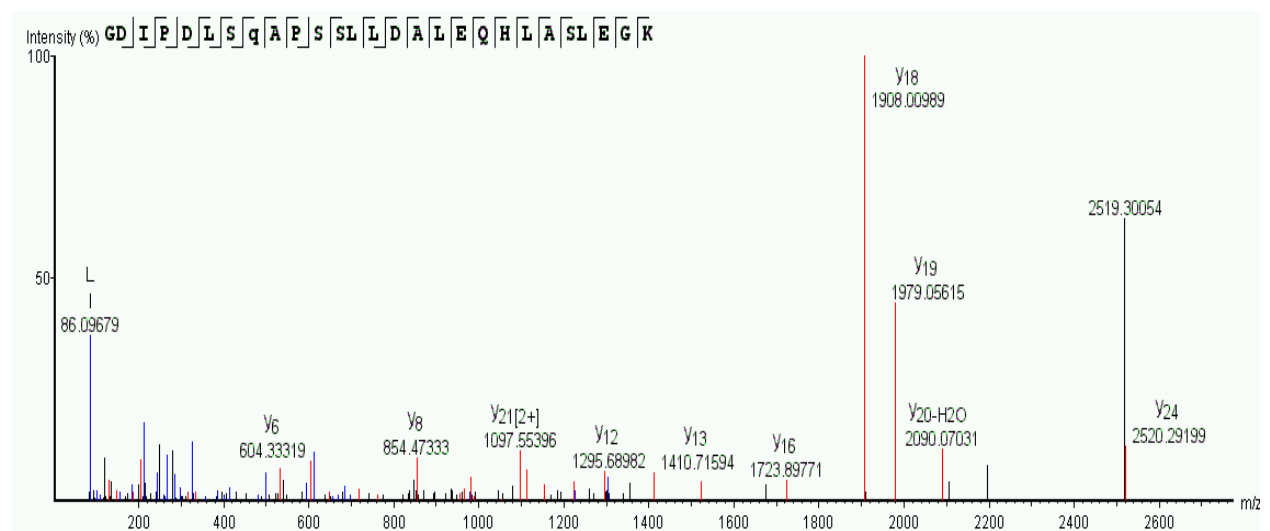

Identified protein:

|Q13492-4|PICAL\_HUMAN Isoform 4 of Phosphatidylinositol-binding clathrin assembly protein

**37. MS/MS at m/z 861.1302 (3+, RT=70.5474)**

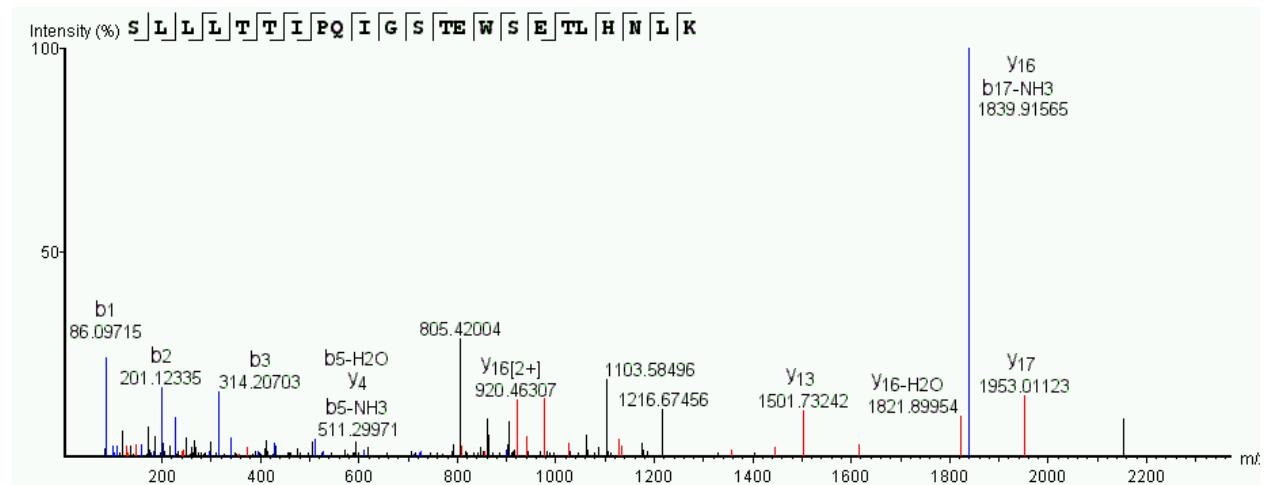

Identified protein:

|Q13126-2|MTAP\_HUMAN Isoform 2 of S-methyl-5'-thioadenosine phosphorylase

**38. MS/MS at  $m/z$  485.75253 (2+, RT=10.1586)**

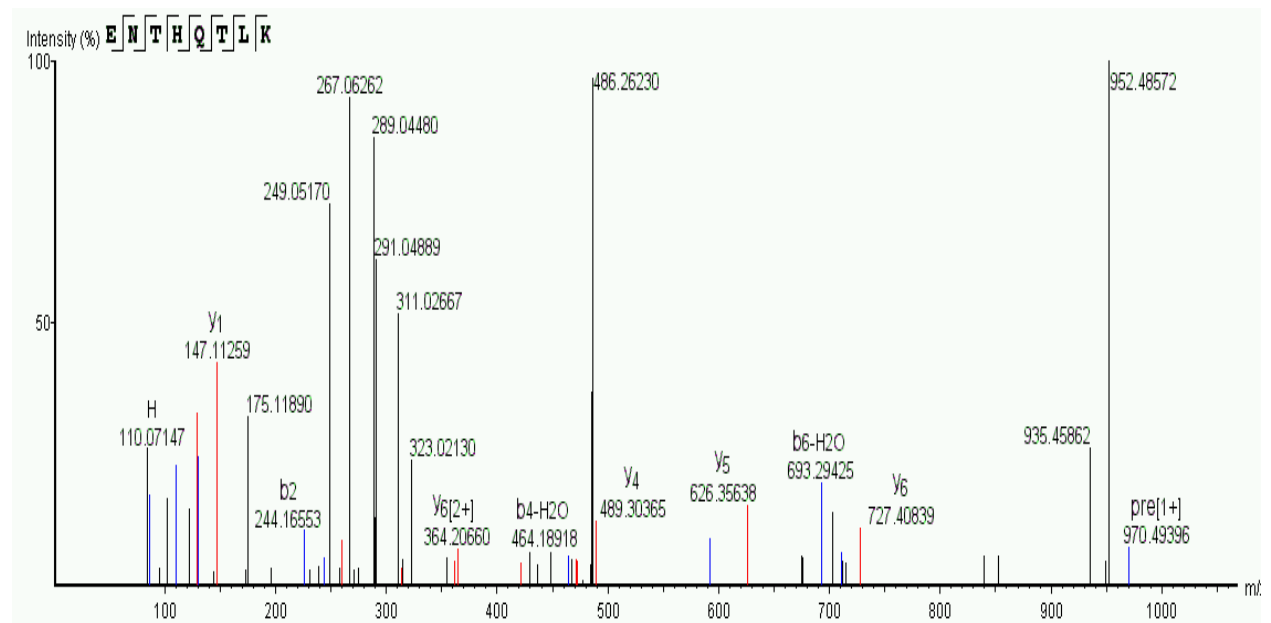

Identified protein:

|C9JRZ6| CHCHD3\_HUMAN MICOS complex subunit MIC19

**39. MS/MS at m/z 547.2846 (2+, RT=16.3791)**

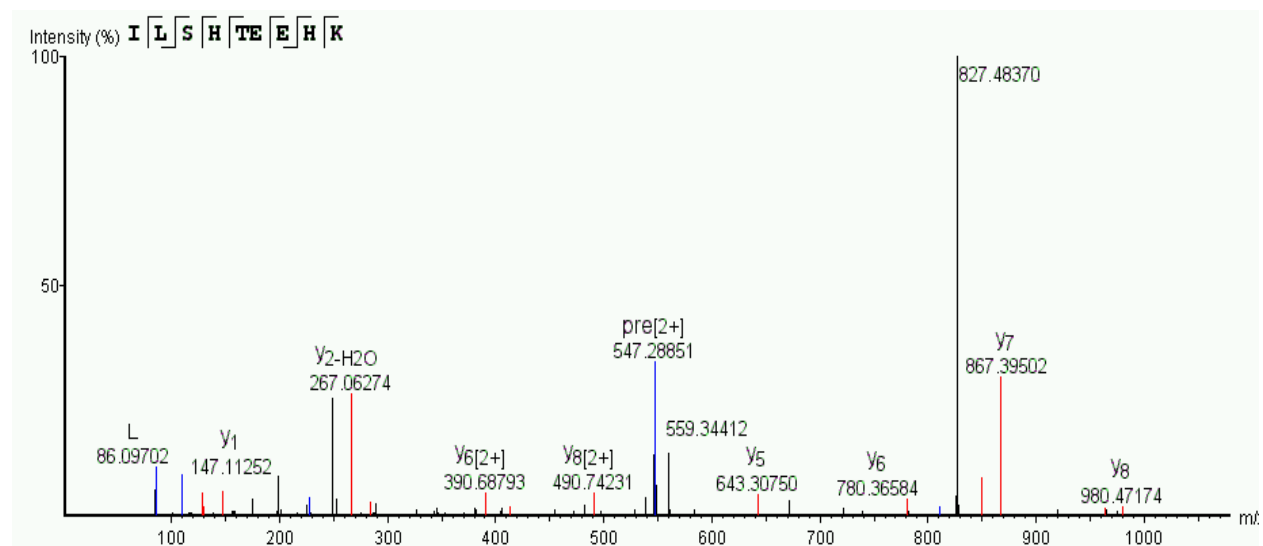

Identified protein:

|Q6Y1H2|HACD2\_HUMAN Very-long-chain (3R)-3-hydroxyacyl-CoA dehydratase 2 OS=Homo sapiens  
GN=HACD2 PE=1 SV=1



**40. MS/MS at m/z 712.3575 (2+, RT=51.0747)**

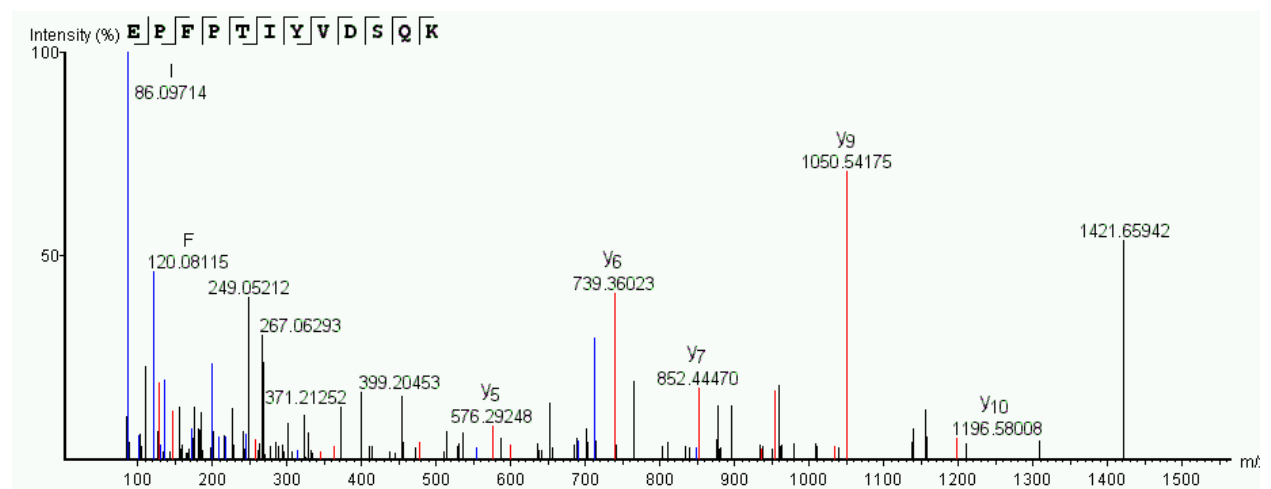

Identified protein:

|K7EJ19| NARS\_HUMAN Asparagine--tRNA ligase, cytoplasmic

**41. MS/MS at m/z 691.3229 (2+, RT=53.9739)**

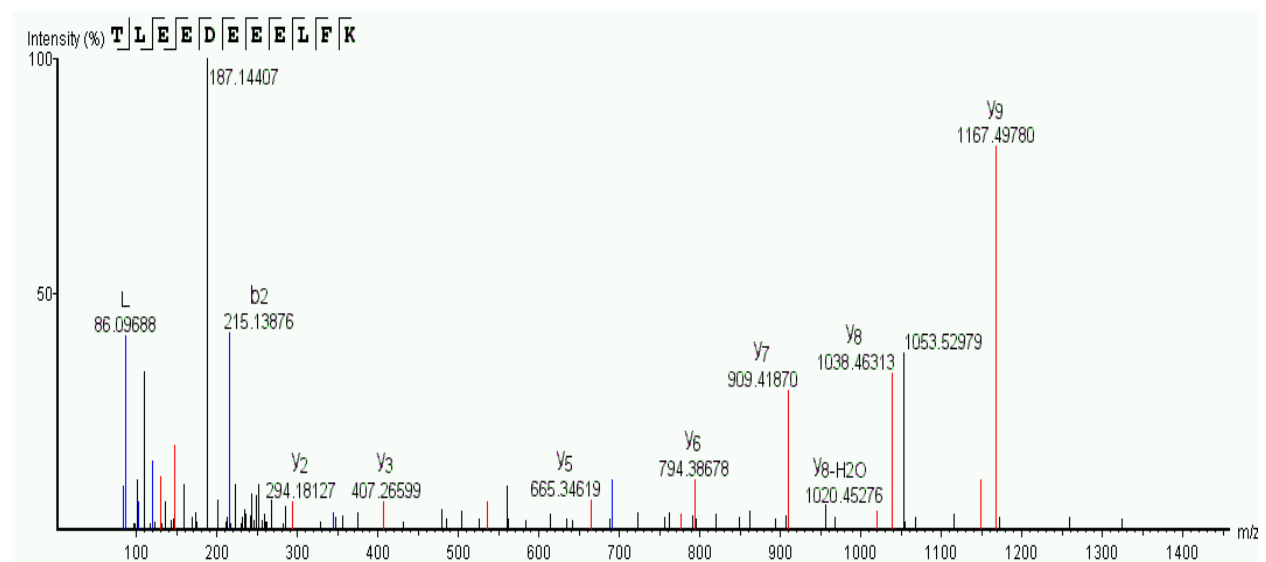

Identified protein:

|F6WQW2|F6WQW2\_HUMAN Ran-specific GTPase-activating protein

**42. MS/MS at  $m/z$  715.7257 (3+, RT=89.8557)**

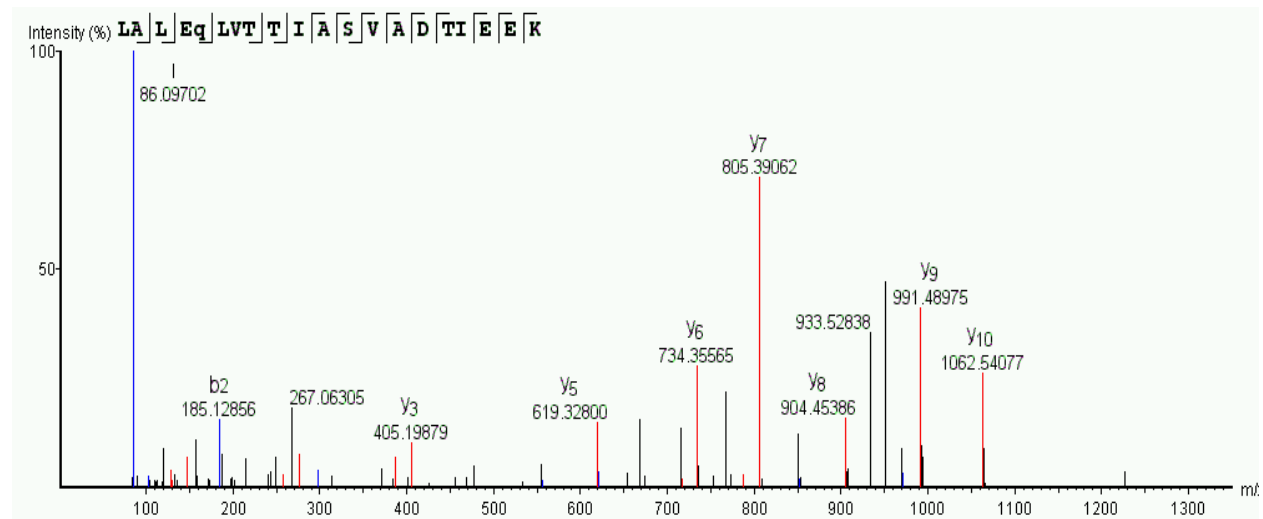

Identified protein

|O60518|RNBP6\_HUMAN Ran-binding protein 6

**43. MS/MS at  $m/z$  707.796 (2+, RT=33.7968)**

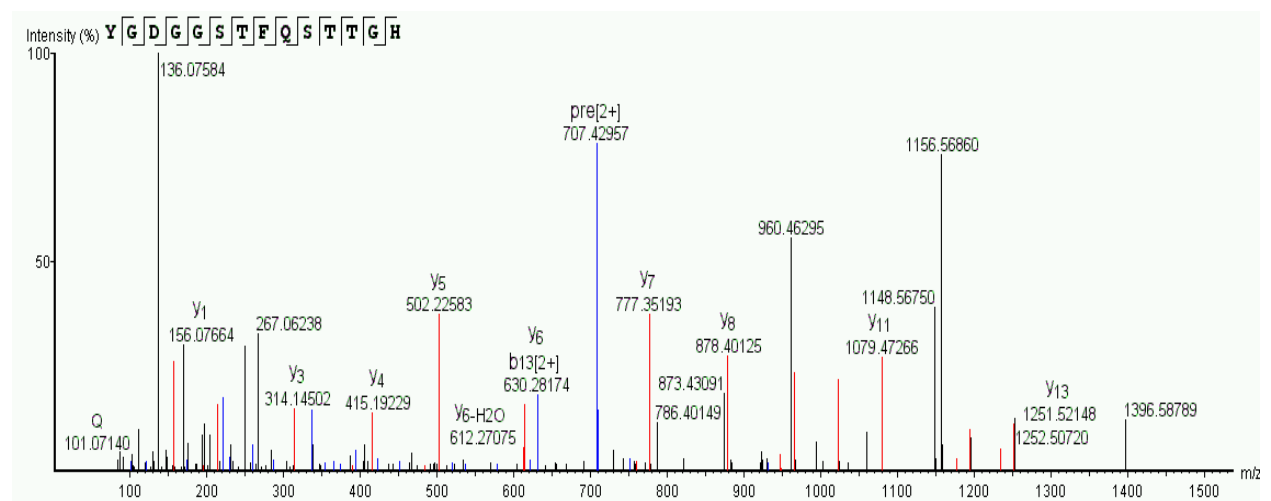

Identified protein:

|E9PCY7|HNRNPH1\_HUMAN Heterogeneous nuclear ribonucleoprotein H

44. MS/MS at m/z 563.29944 (2+, RT=49.1609)

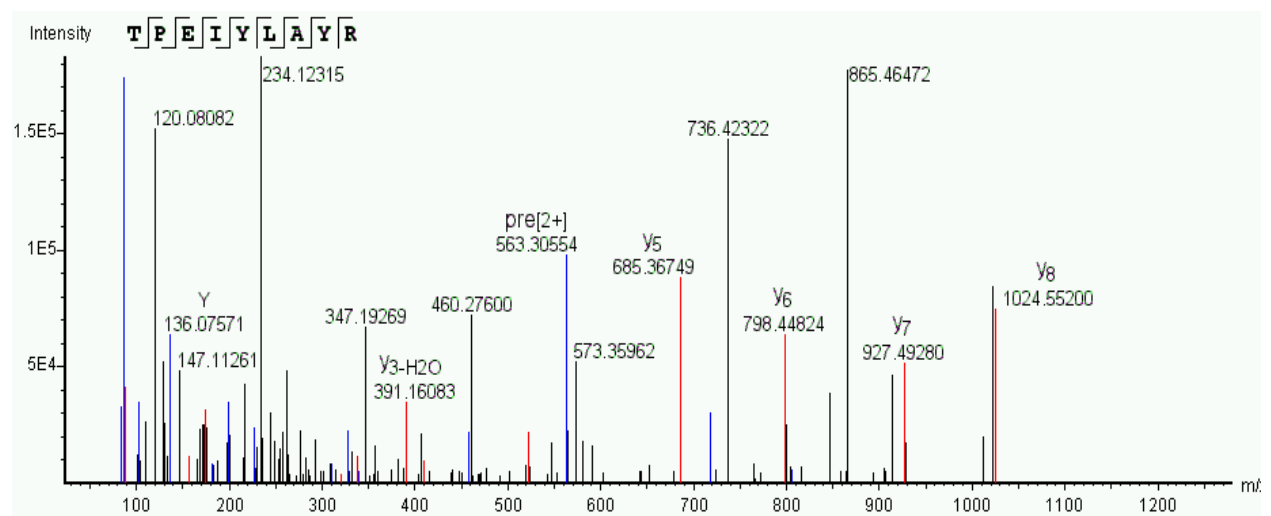

Identified protein:

|Q8TAQ2-2|SMRC2\_HUMAN Isoform 2 of SWI/SNF complex subunit SMARCC2

45. MS/MS at m/z 557.77655 (2+, RT=30.0105)

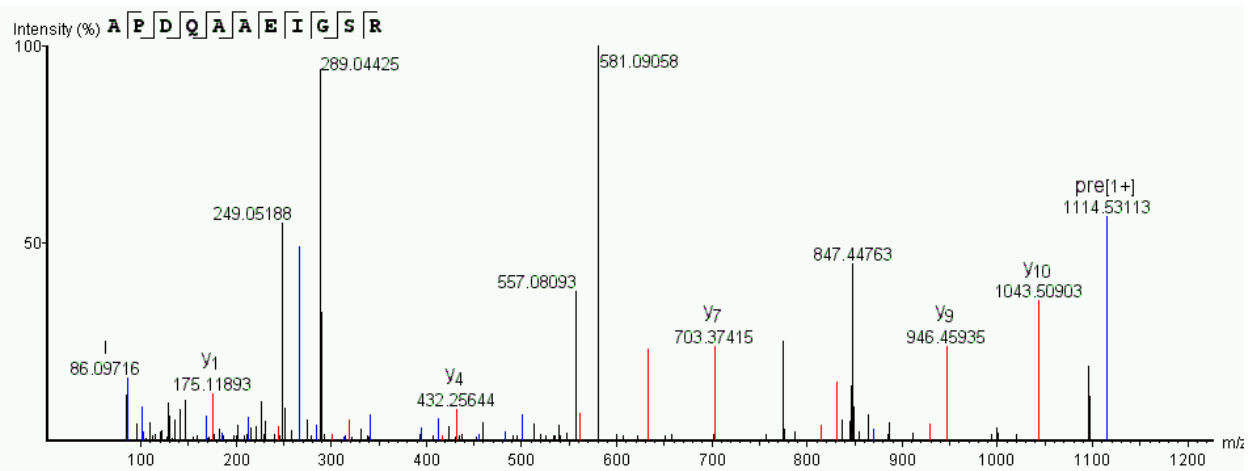

Identified protein:

|Q3ZCQ8-2|TIM50\_HUMAN Isoform 2 of Mitochondrial import inner membrane translocase subunit  
TIM50

46. MS/MS at m/z 717.34174 (1+, RT=26.0066)

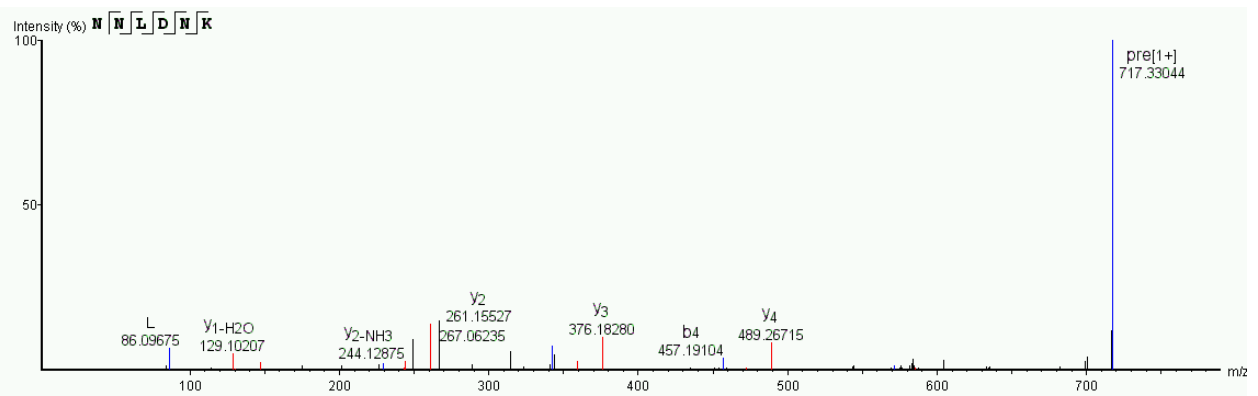

Identified protein:

|O60315|ZEB2\_HUMAN Zinc finger E-box-binding homeobox 2

**47. MS/MS at  $m/z$  577.81024 (2+, RT=36.7521)**

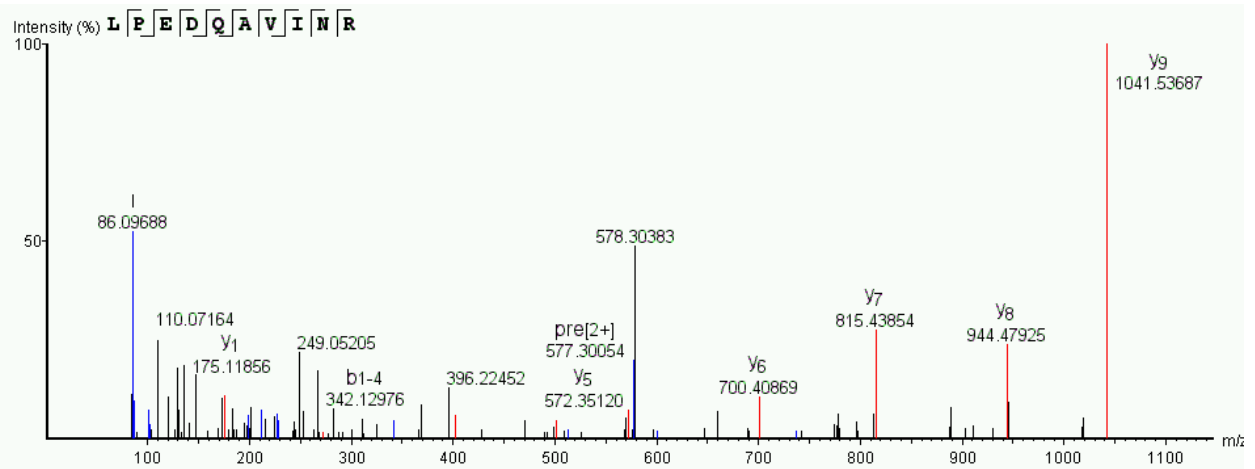

Identified protein:

|I3NI32|DHODH\_HUMAN Dihydroorotate dehydrogenase (quinone), mitochondrial



**48. MS/MS at  $m/z$  725.72284 (3+, RT=81.4603)**

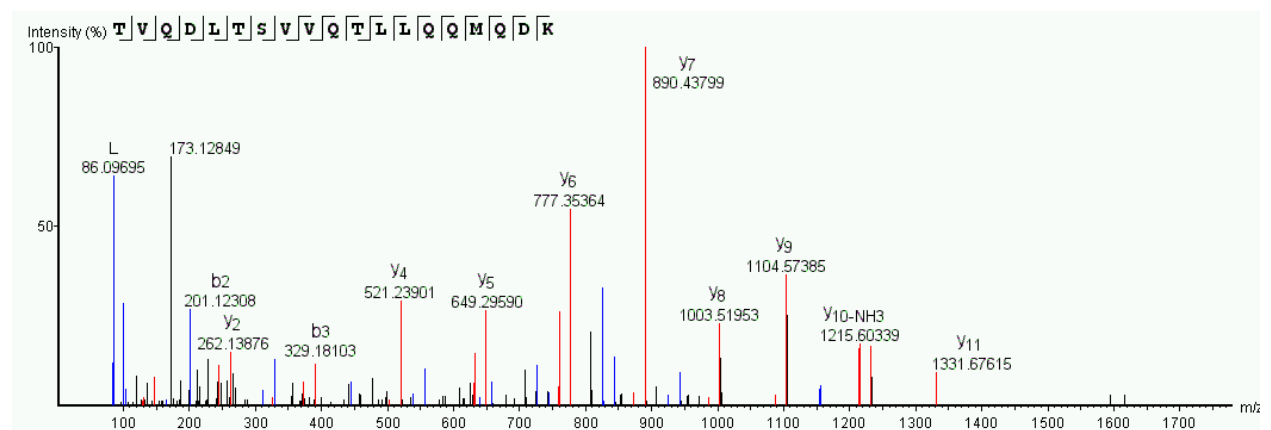

Identified protein:

|O75506|HSBP1\_HUMAN Heat shock factor-binding protein 1

**49. MS/MS at 564.77545 (2+, RT=29.0885)**

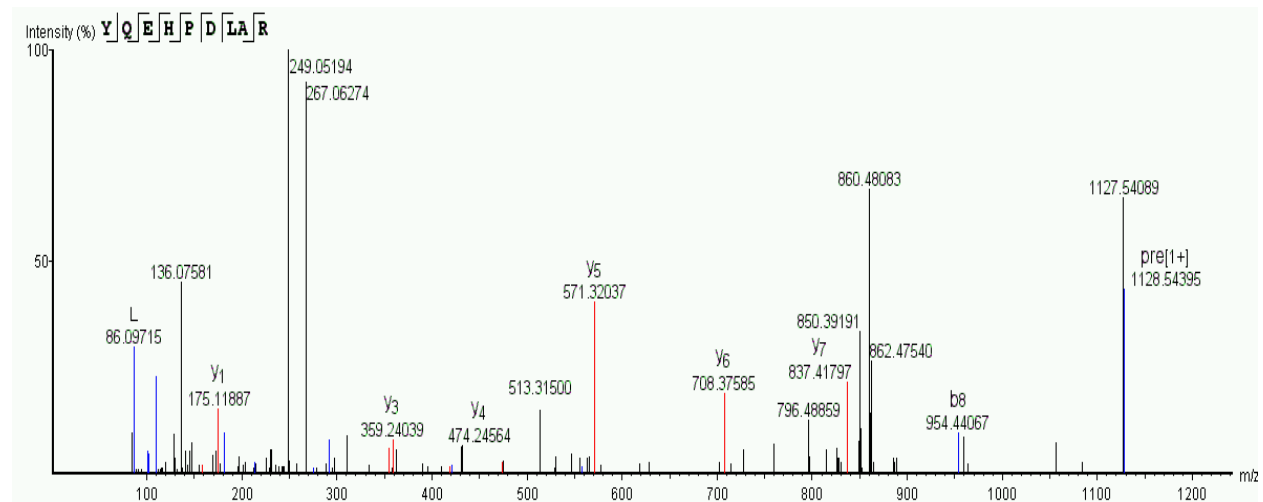

Identified protein:

|P17844|DDX5\_HUMAN Probable ATP-dependent RNA helicase DDX5

50. MS/MS/at  $m/z$  655.37616 (1+, RT=23.548)

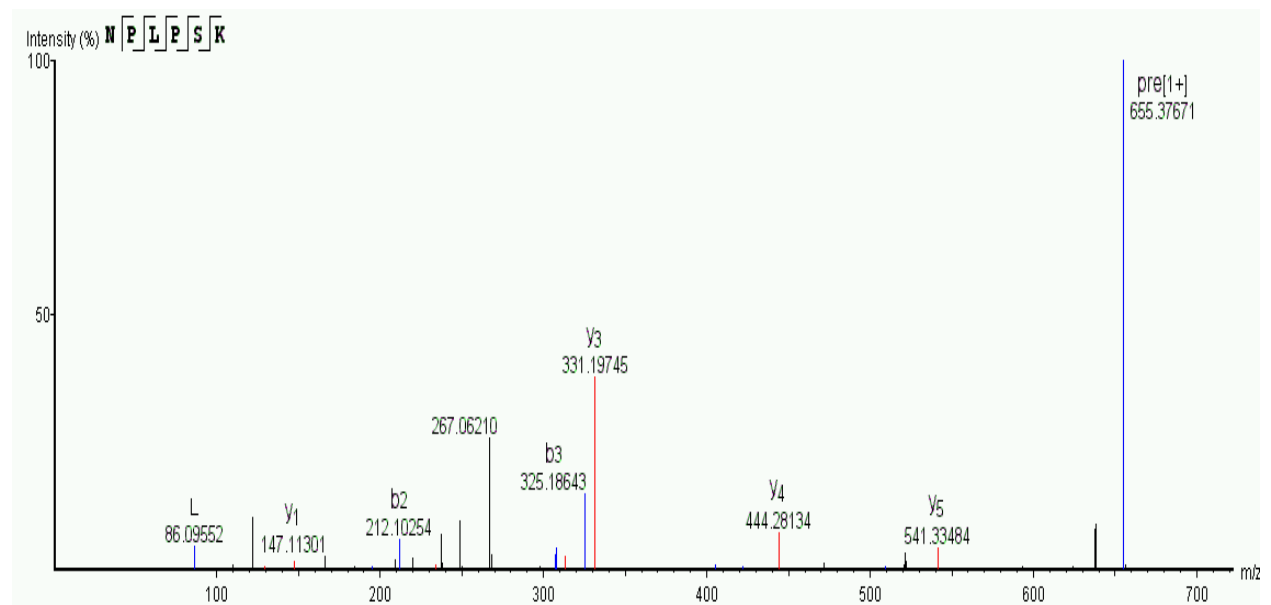

Identified protein:

|P62328|TYB4\_HUMAN Thymosin beta-4

**51. MS/MS at  $m/z$  704.3343 (1+, RT=32.0281)**

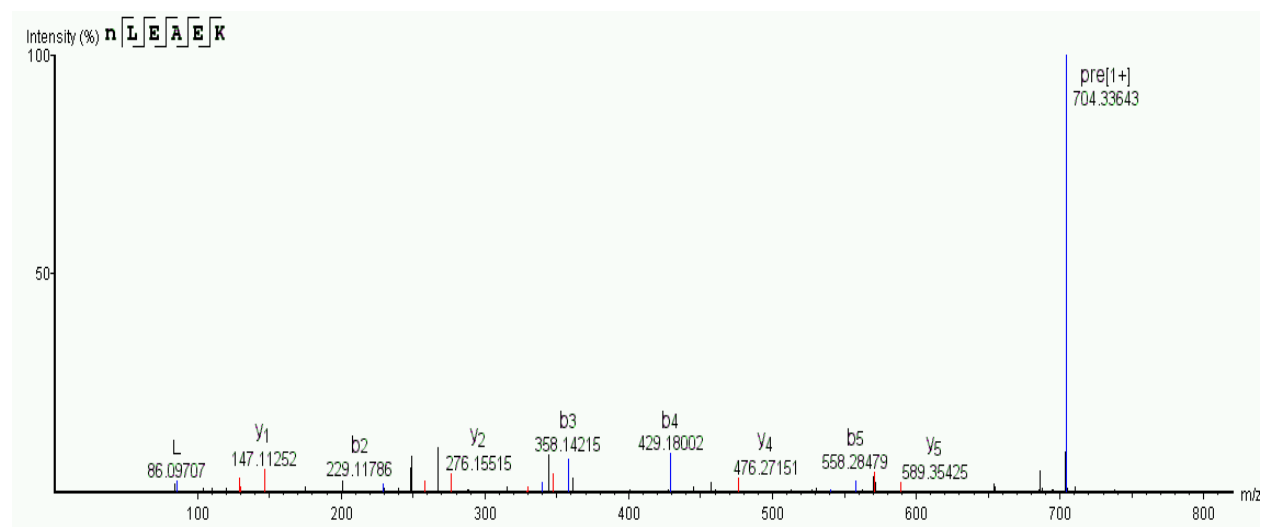

Identified protein:

|Q99728|BARD1\_HUMAN BRCA1-associated RING domain protein 1

**52. MS/MS at  $m/z$  1123.5682 (3+, RT=84.3371)**

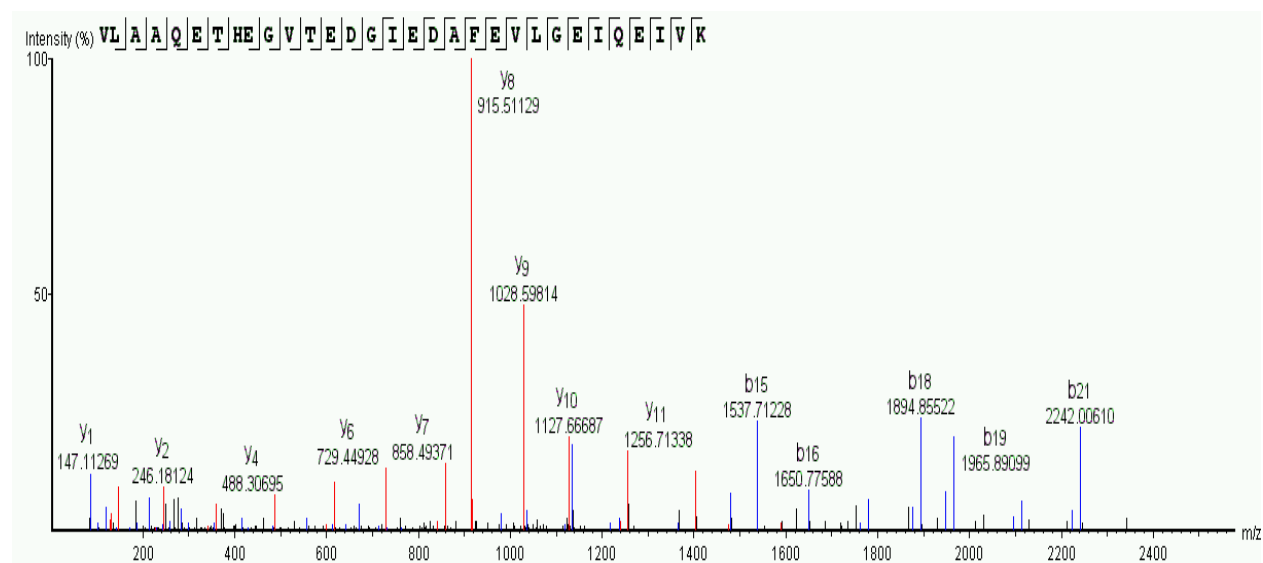

Identified protein:

| P35606-2 | COPB2\_HUMAN Isoform 2 of Coatamer subunit beta

**53. MS/MS at  $m/z$  552.3267 (2+, RT=61.2268)**

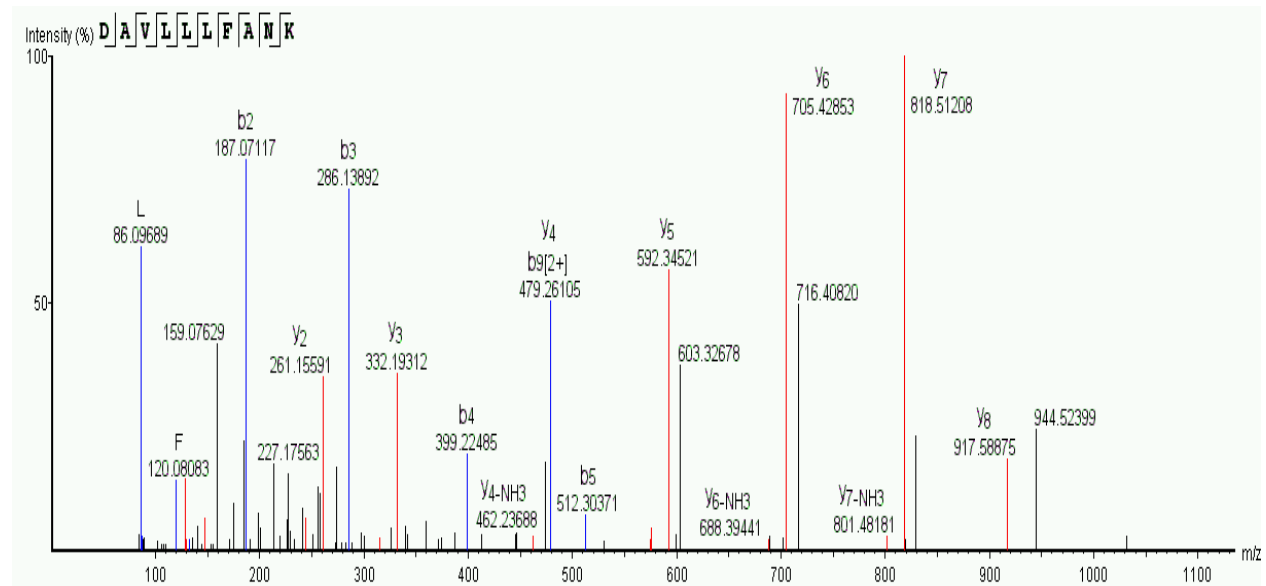

Identified protein:

|P18085|ARF4\_HUMAN ADP-ribosylation factor 4

**54. MS/MS at m/z 524.2674 (2+, RT=33.1141)**

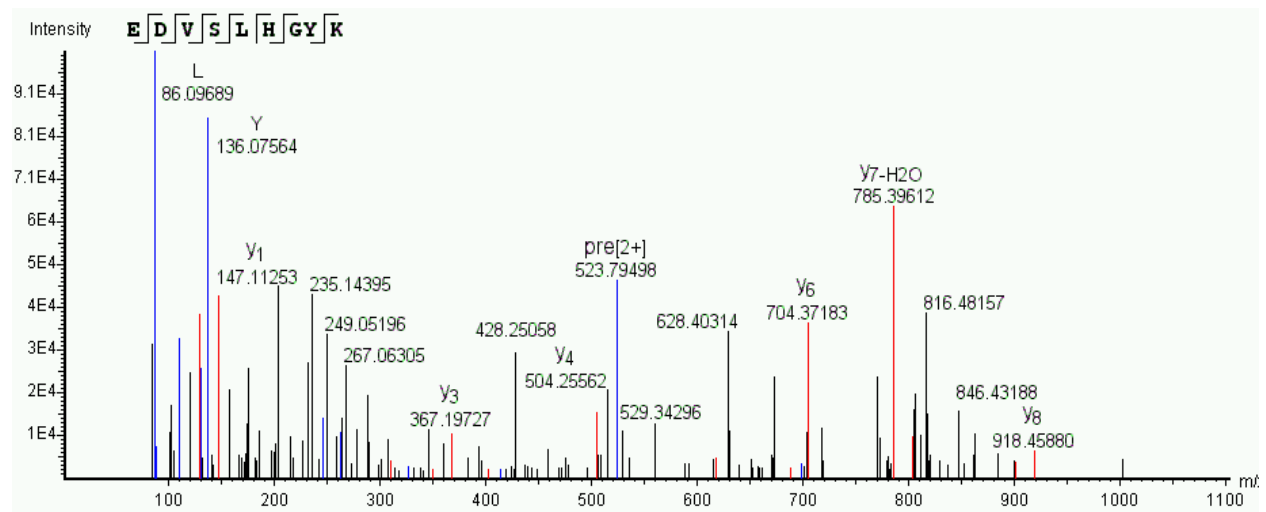

Identified protein:

|Q12792-4|TWF1\_HUMAN Isoform 4 of Twinfilin-1 OS=Homo sapiens GN=TWF1

**55. MS/MS at  $m/z$  426.22864 (2+, RT=34.6134)**

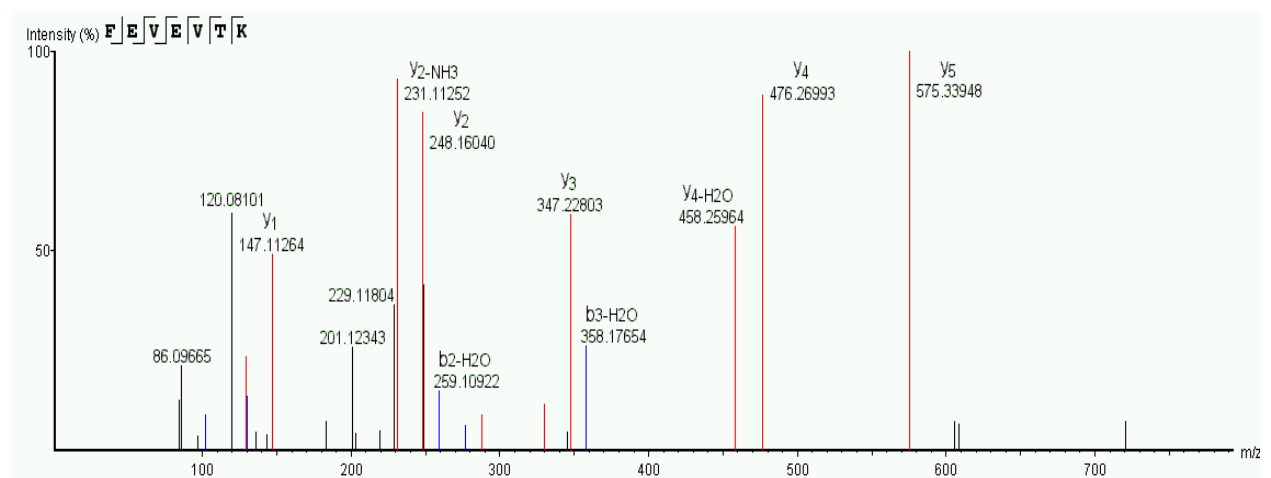

Identified protein:

|Q96JB1-2|DYH8\_HUMAN Isoform 2 of Dynein heavy chain 8, axonemal



56. MS/MS at m/z 422.25037 (2+, RT=41.3908)

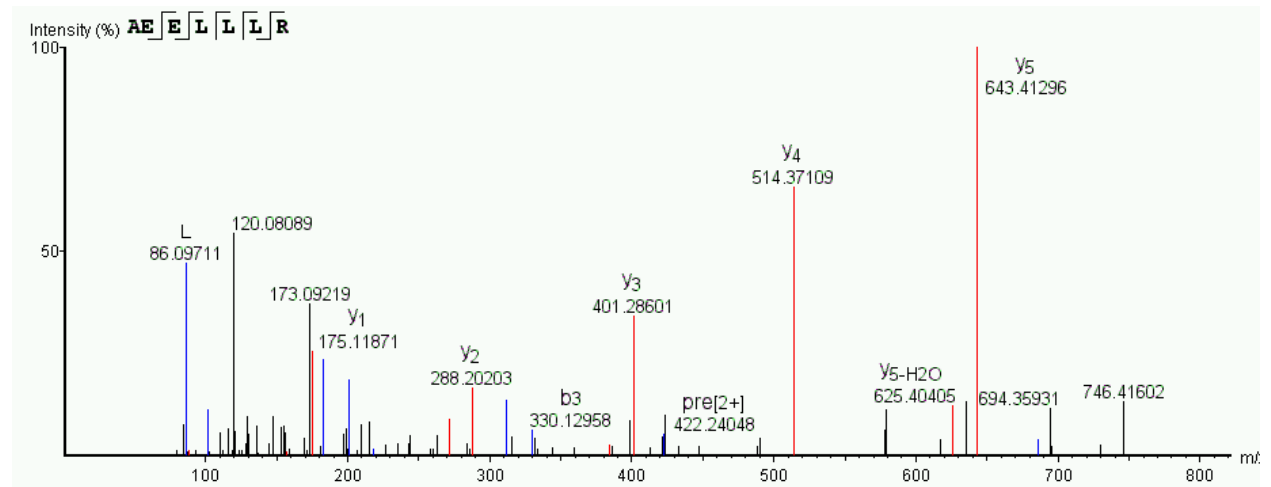

Identified protein:

|A0A087WWY8| LOC402160 \_HUMAN Protein LOC402160

**57. MS/MS at  $m/z$  921.8078 (3+, RT=86.2358)**

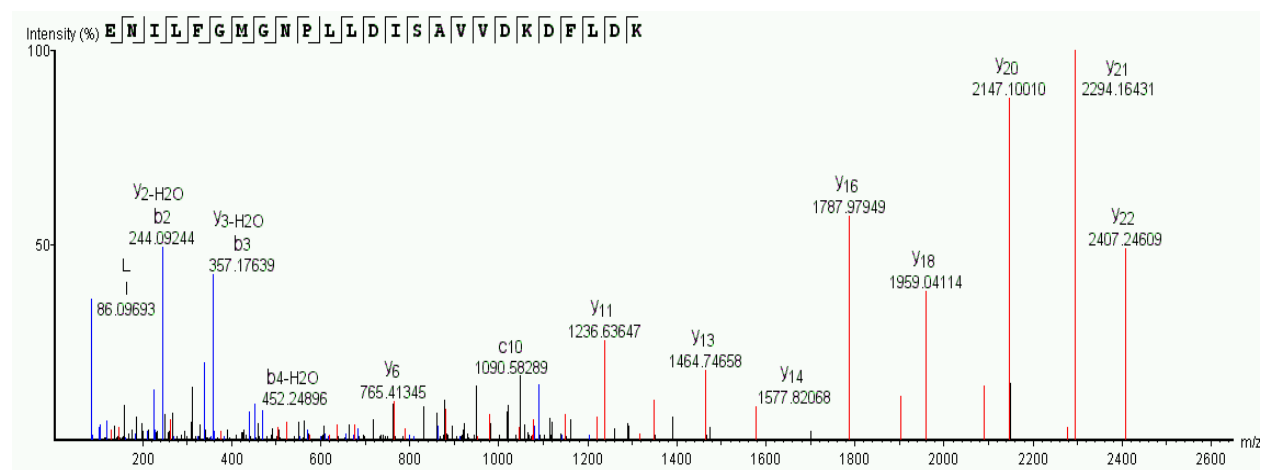

Identified protein:

|P55263-3|ADK\_HUMAN Isoform 3 of Adenosine kinase

**58. MS/MS at 896.44305 (2+, RT=83.1037)**

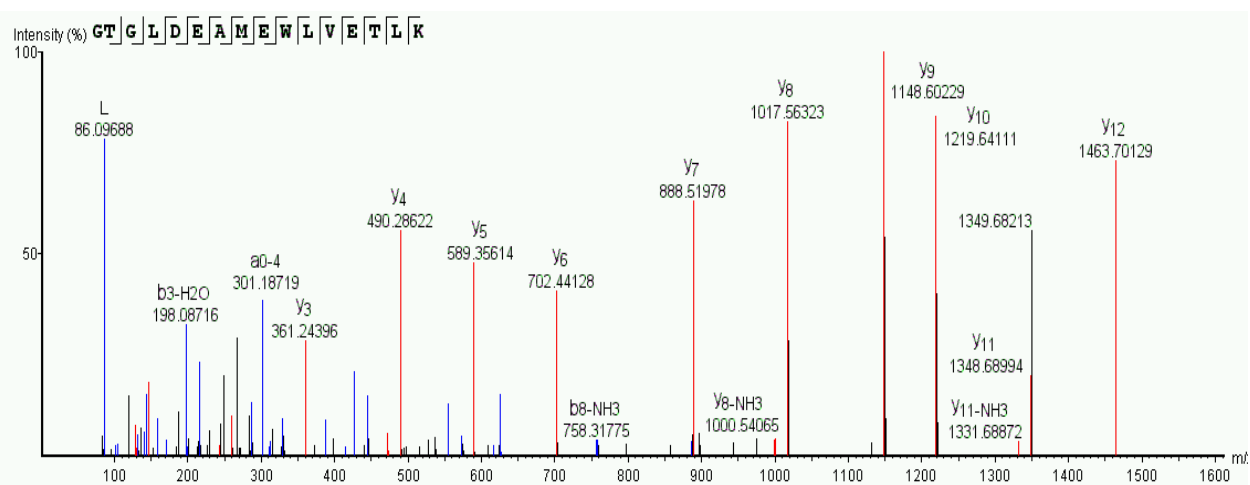

Identified protein:

|P40616-2|ARL1\_HUMAN Isoform 2 of ADP-ribosylation factor-like protein 1

**59. MS/MS at m/z 635.8536 (2+, RT=63.723 )**

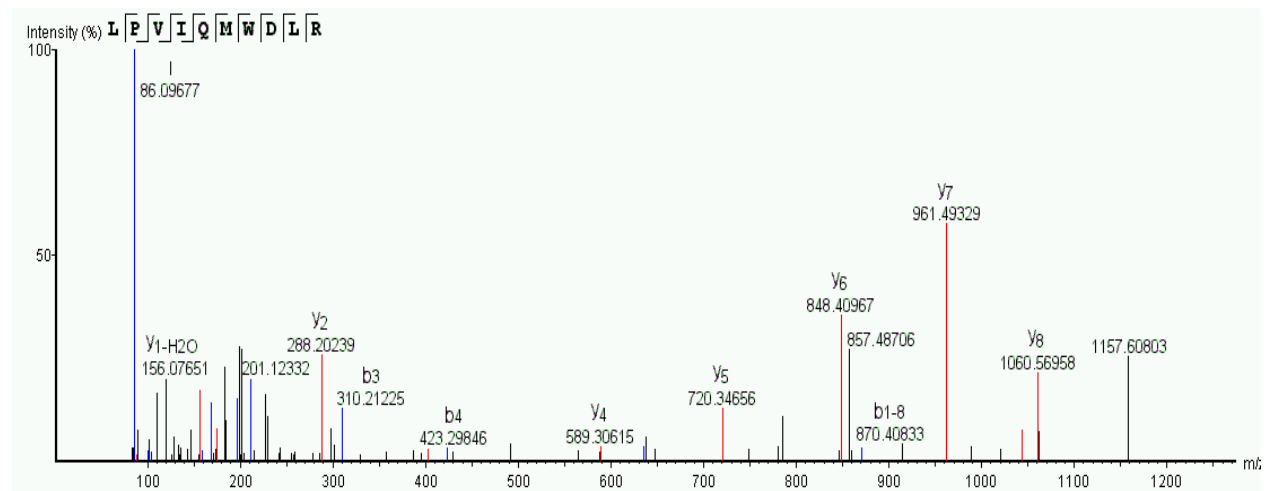

Identified protein:

|D6RHZ5| Sec31A\_HUMAN Protein transport protein Sec31A

**60. MS/MS at m/z 688.839 (4+, RT=75.1043)**

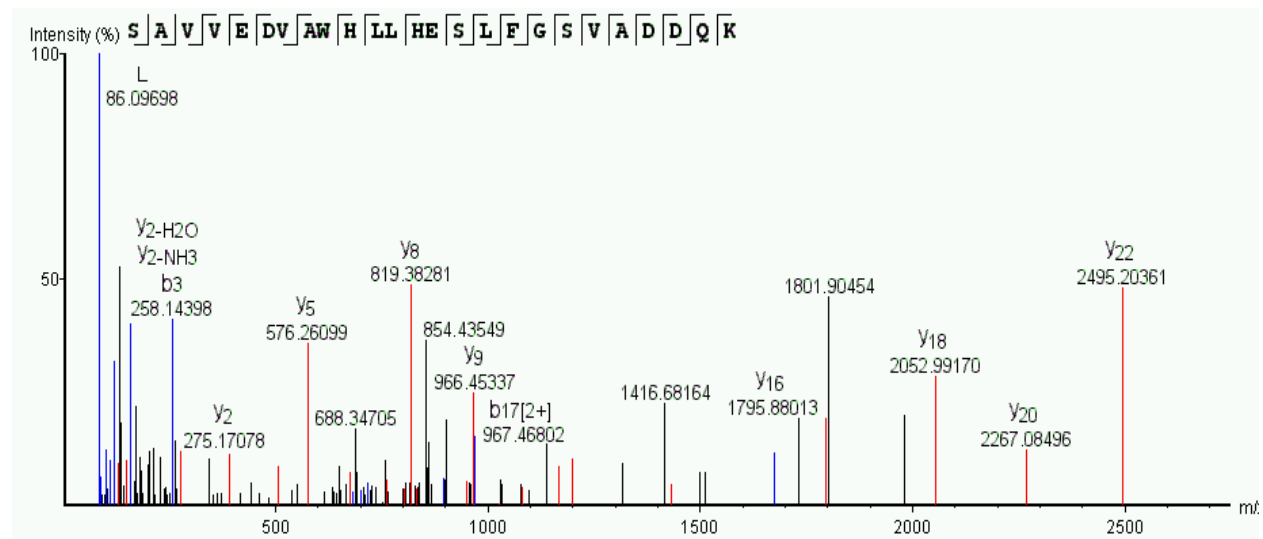

Identified protein:

|E9PC52| RBBP7\_HUMAN Histone-binding protein RBBP7

**61. MS/MS at  $m/z$  593.68524 (3+, RT=89.3045)**

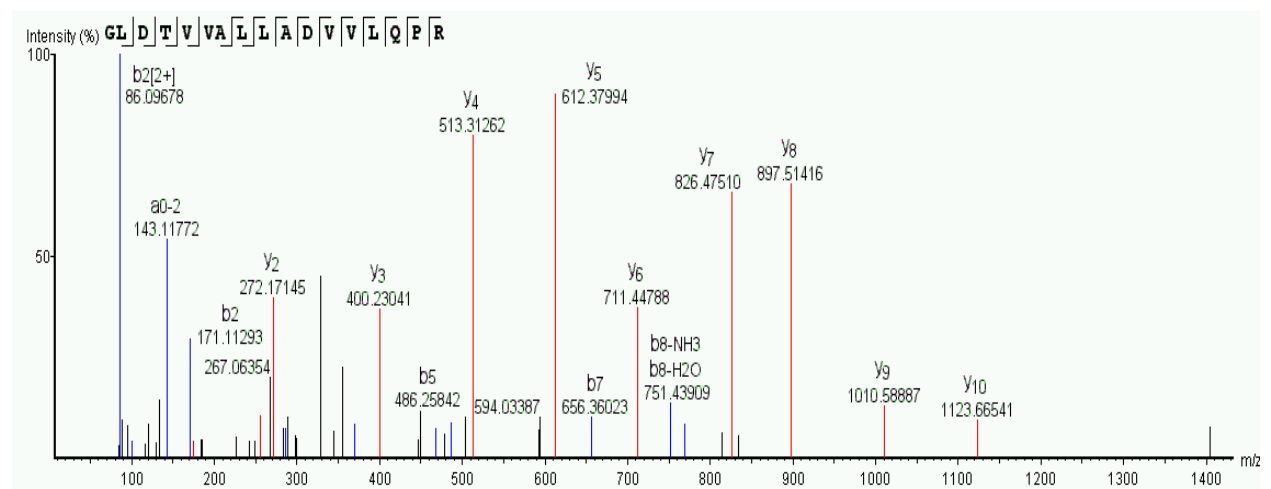

Identified protein:

|Q10713|MPPA\_HUMAN Mitochondrial-processing peptidase subunit alpha

62. MS/MS at  $m/z$  739.41345 (3+, RT=96.1007)

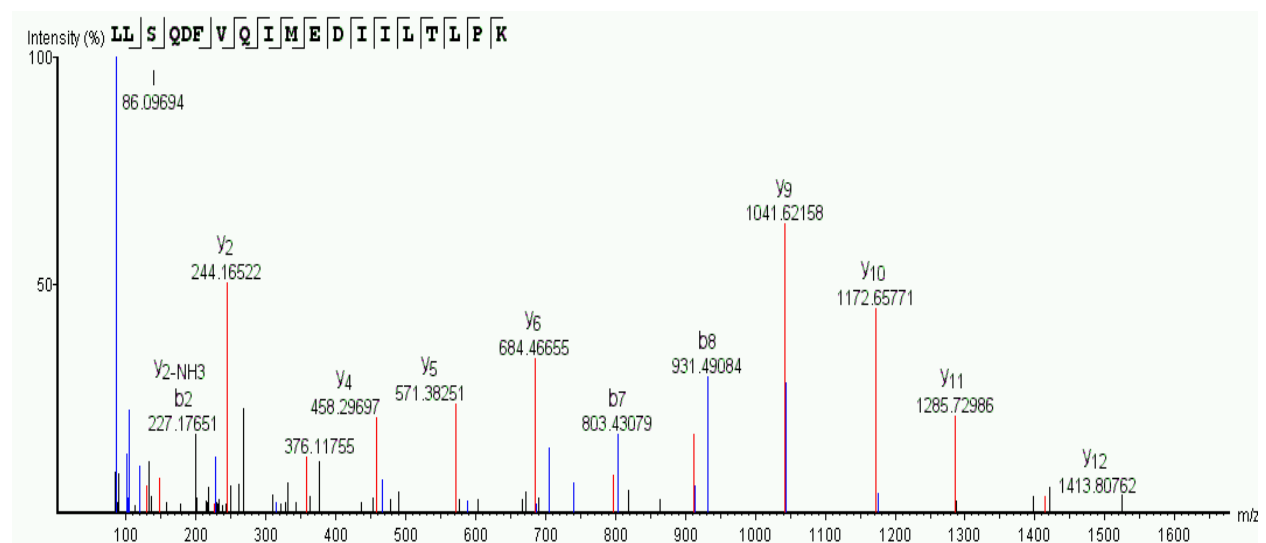

Identified protein:

|P26196|DDX6\_HUMAN Probable ATP-dependent RNA helicase DDX6

**63. MS/MS of precursor ion at  $m/z$  396.72144 (2+, RT=26.498)**

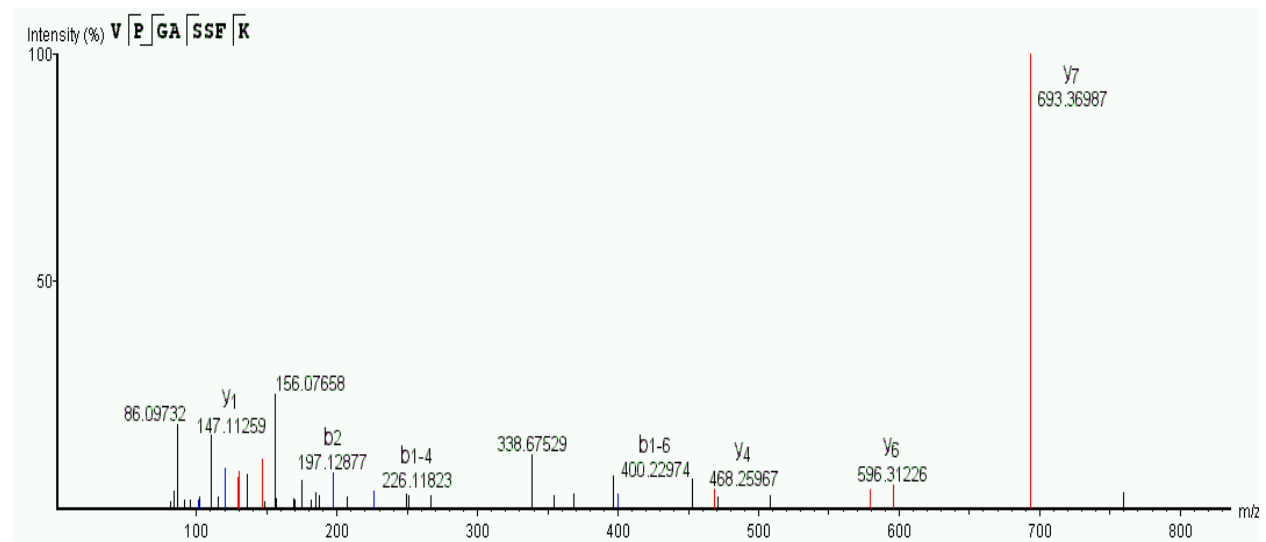

Protein Identification:

|P29590|PML\_HUMAN



64. MS/MS at m/z 587.7882 (2+, RT=29.6792)

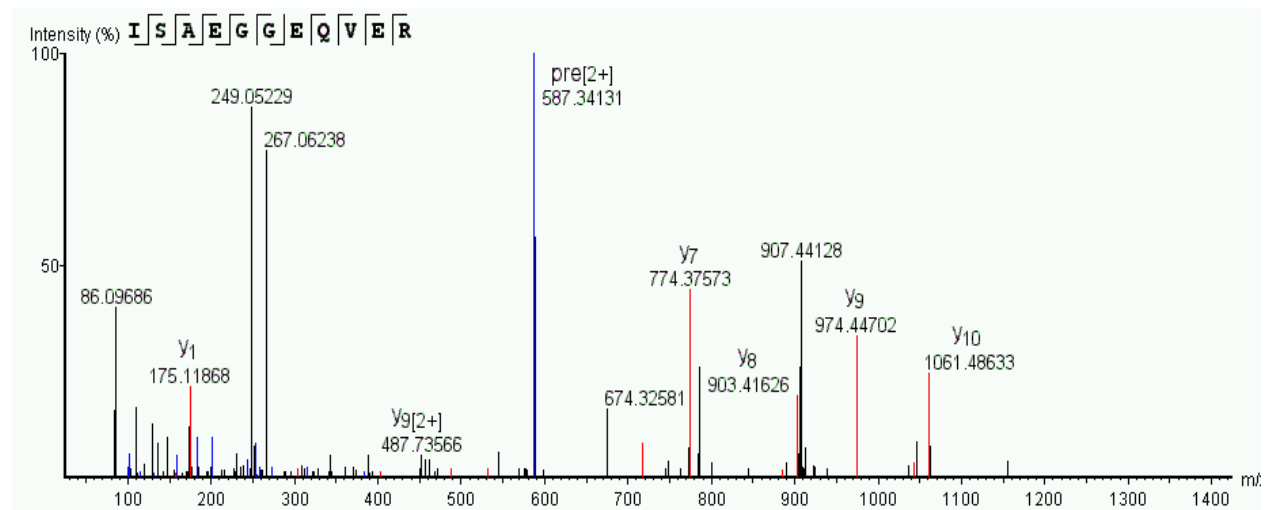

Identified protein:

|J3KQL8| APOL2\_HUMAN Apolipoprotein L2

65. MS/MS at  $m/z$  1171.9077 (3+, RT=84.1447)

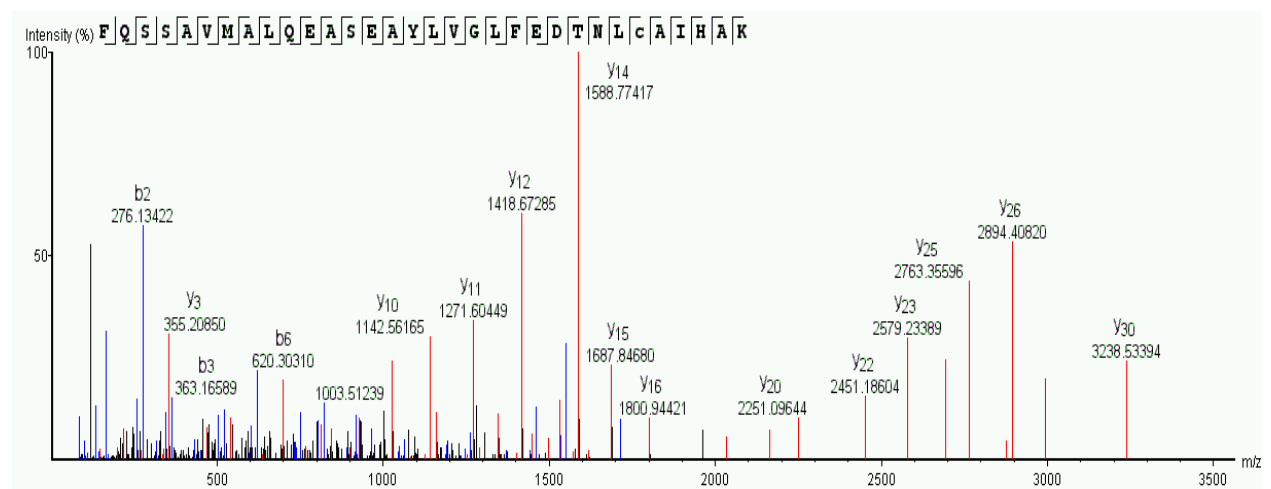

Identified protein:

|Q71DI3|H32\_HUMAN Histone H3.2

**66. MS/MS at m/z 474.24164 (3+, RT=44.4249)**

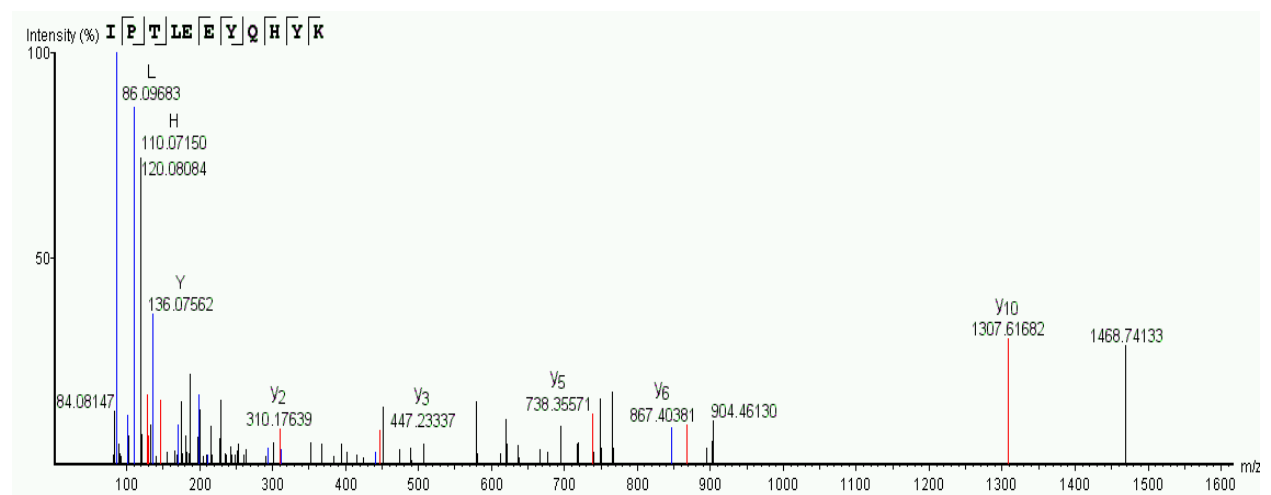

Identified protein:

|P61978-3|HNRPK\_HUMAN Isoform 3 of Heterogeneous nuclear ribonucleoprotein K

**67. MS/MS at m/z 502.8154 (2+, RT=47.742)**

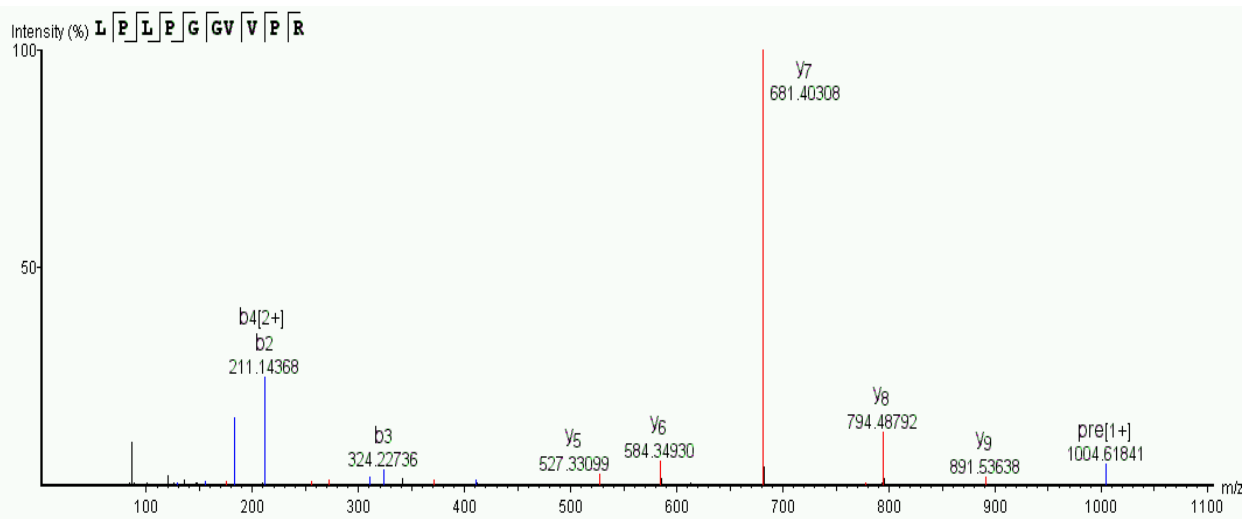

Identified protein:

|P17931|LEG3\_HUMAN Galectin-3

**68. MS/MS at  $m/z$  663.84924 (2+, RT=59.8639)**

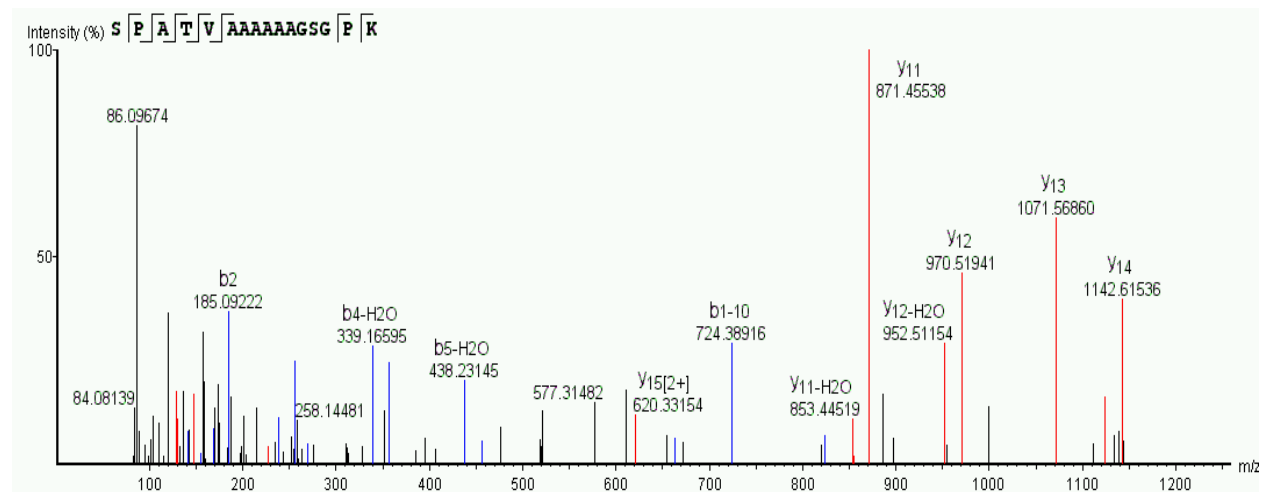

Identified protein:

|Q13045-3| FLII\_HUMAN Isoform 3 of Protein flightless-1 homolog

**69. MS/MS at  $m/z$  371.69415 (2+, RT=22.8573)**

Right sequence should be YDGM(ox)LK

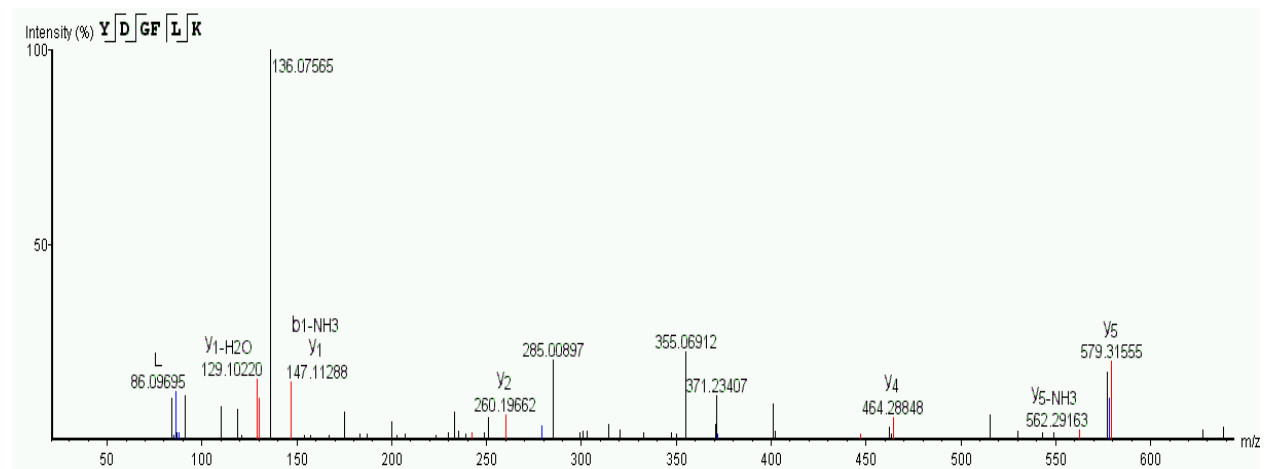

Identified protein:

|B4DGL8|B4DGL8\_HUMAN ATP-binding cassette sub-family B member 7, mitochondrial (Fragment)

**70. MS/MS at  $m/z$  611.79034 (2+, RT=43.9018)**

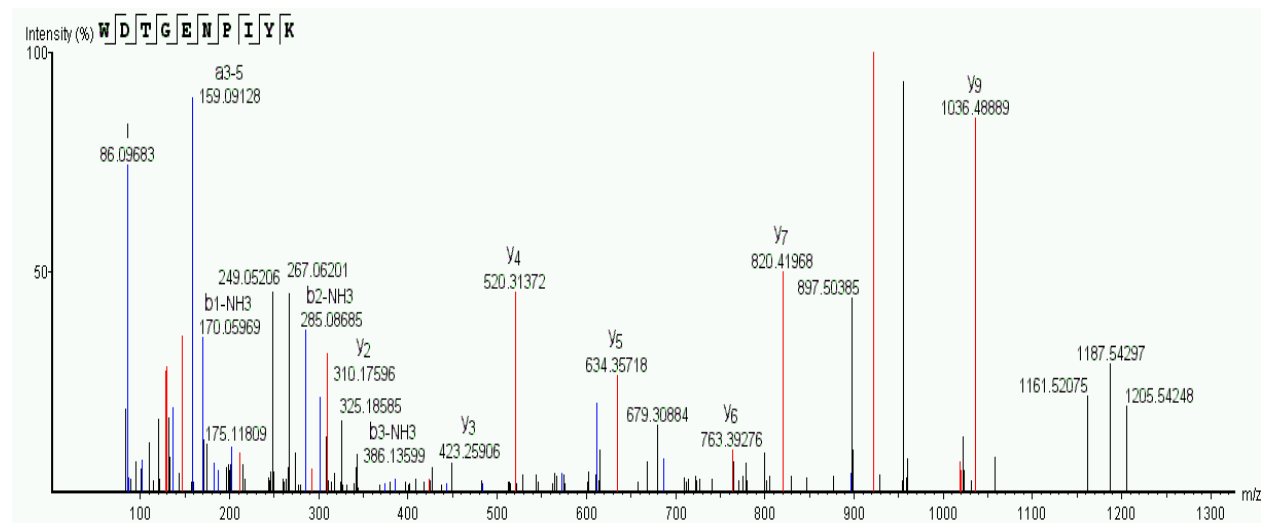

Identified protein:

|P05556|ITB1\_HUMAN Integrin beta-1

**71. MS/MS at  $m/z$  504.55502 (3+, RT=37.045)**

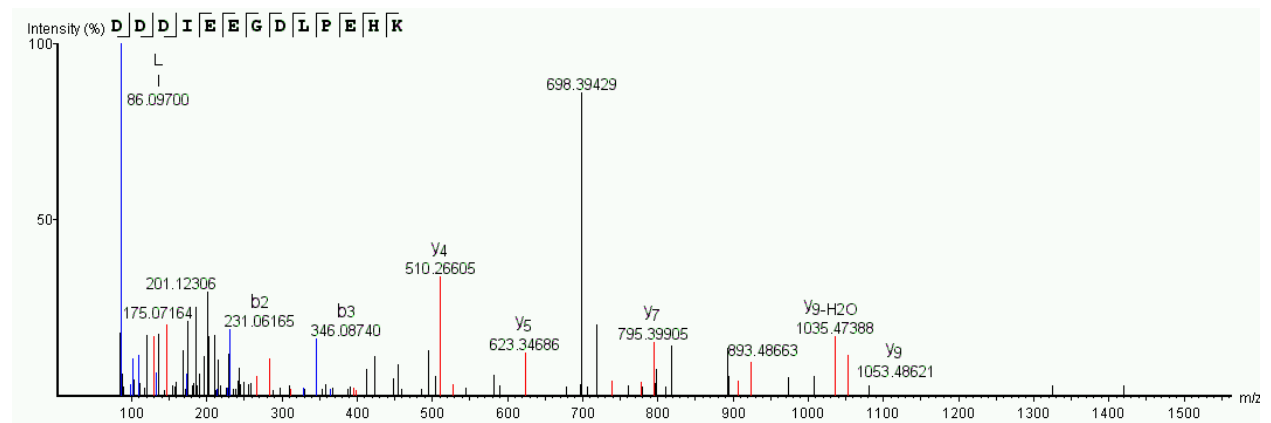

Identified protein:

|Q14696|MESD\_HUMAN LDLR chaperone MESD



**72. MS/MS at  $m/z$  809.8797 (2+, RT=62.292)**

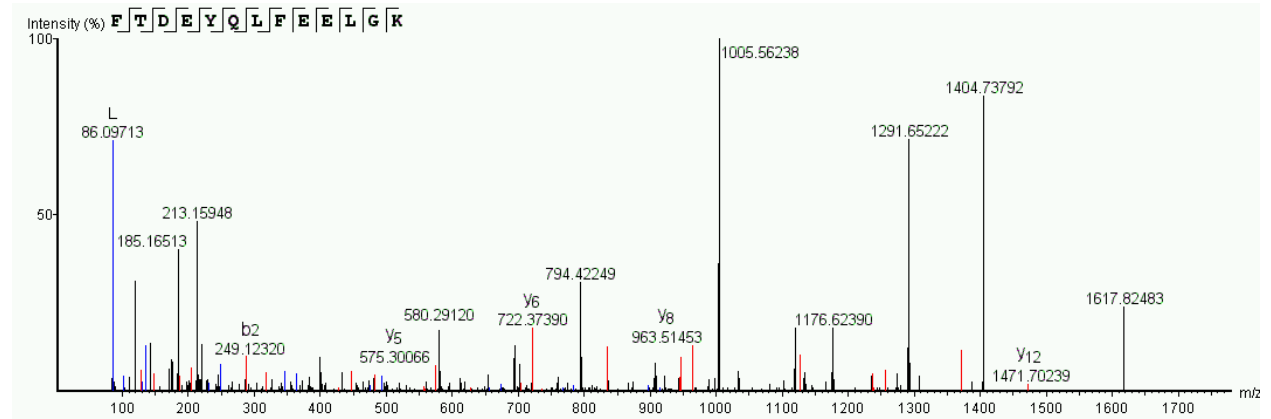

Identified protein:

|Q13557-12|KCC2D\_HUMAN Isoform Delta 12 of Calcium/calmodulin-dependent protein kinase type II subunit delta, Coeluted with 213-I/LGDSP

**73. MS/MS at  $m/z$  529.27893 (2+, RT=32.0484)**

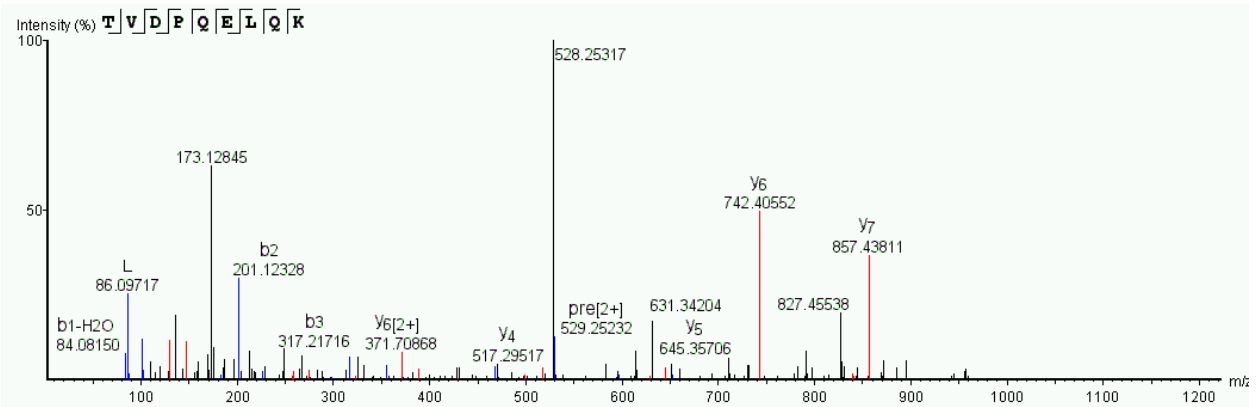

| # | Immonium  | b         | b-H2O     | b-NH3     | c         | b (2+)    | Seq | y         | y-H2O     | y-NH3     | y (2+)    | # |
|---|-----------|-----------|-----------|-----------|-----------|-----------|-----|-----------|-----------|-----------|-----------|---|
| 1 | 74.06051  | 102.05527 | 84.08150  | 85.02851  | 119.08251 | 51.52776  | T   |           |           |           |           | 9 |
| 2 | 72.08124  | 201.12328 | 183.11252 | 184.09691 | 218.15091 | 101.07127 | V   | 956.50470 | 938.49414 | 939.47772 | 478.75235 | 8 |
| 3 | 88.03996  | 316.15088 | 298.13910 | 299.12387 | 333.17786 | 158.57542 | D   | 857.43811 | 839.41901 | 840.42200 | 429.22296 | 7 |
| 4 | 70.06558  | 413.20361 | 395.19305 | 396.17664 | 430.23062 | 207.10181 | P   | 742.40552 | 724.39880 | 725.38239 | 371.70868 | 6 |
| 5 | 101.07127 | 541.26221 | 523.25165 | 524.23523 | 558.28925 | 271.13110 | Q   | 645.35706 | 627.34601 | 628.32605 | 323.13440 | 5 |
| 6 | 102.05527 | 670.30475 | 652.32153 | 653.27777 | 687.33179 | 335.65237 | E   | 517.29517 | 499.28867 | 500.27103 | 259.14902 | 4 |
| 7 | 86.09717  | 783.38885 | 765.37830 | 766.36188 | 800.41589 | 392.19443 | L   | 388.25806 | 370.24487 | 371.22845 | 194.62772 | 3 |
| 8 | 101.07140 | 911.44739 | 893.43683 | 894.42041 | 928.47443 | 456.22369 | Q   | 275.17163 | 257.16022 | 258.14505 | 138.08568 | 2 |
| 9 | 101.10778 |           |           |           |           |           | K   | 147.11304 | 129.10219 | 130.08644 | 74.05640  | 1 |

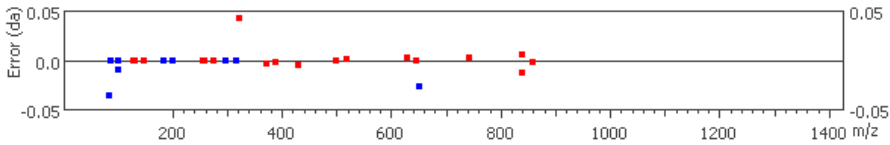

Identified protein:

|P30626-3|SORCN\_HUMAN Isoform 3 of Sorcin

**74. MS/MS at  $m/z$  518.6269 (3+, RT=58.6074)**

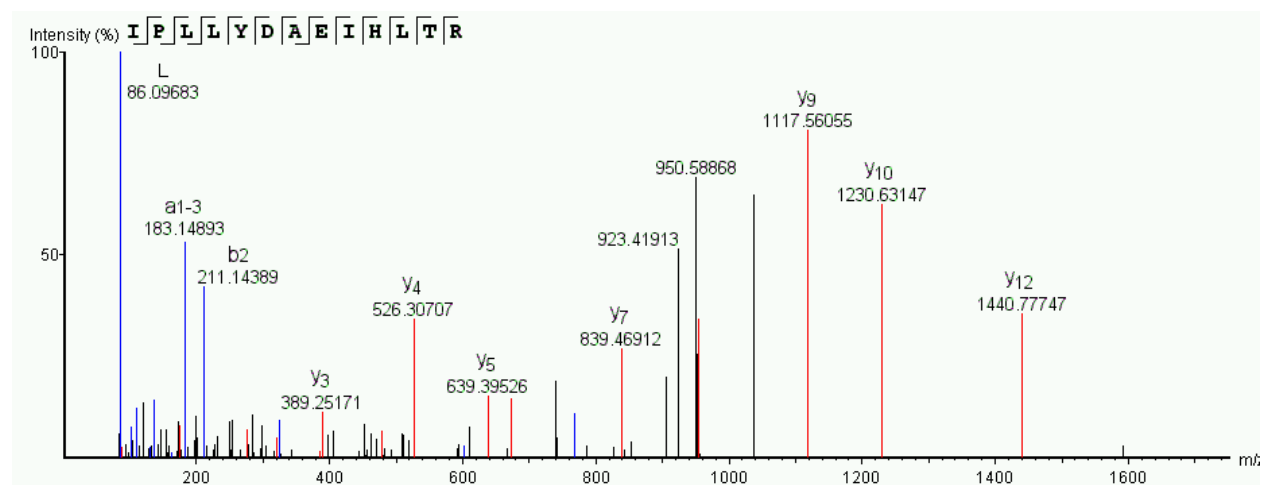

Identified protein:

|P17301|ITA2\_HUMAN Integrin alpha-2

**75. MS/MS at  $m/z$  437.2263 (2+, RT=23.6921)**

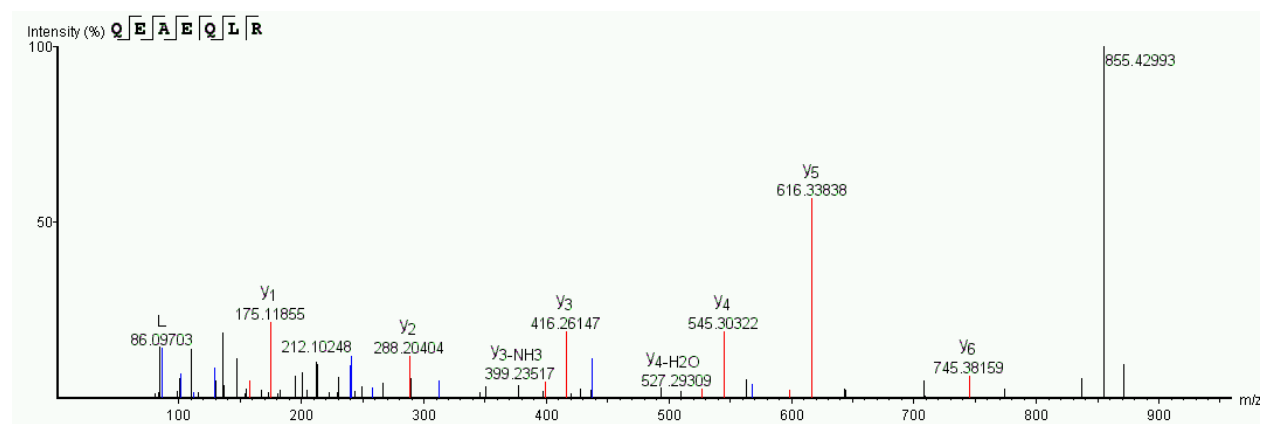

Identified protein:

|P62879|GGB2\_HUMAN Guanine nucleotide-binding protein G(I)/G(S)/G(T) subunit beta-2

76. MS/MS at  $m/z$  732.36804 (2+, RT=60.0518)

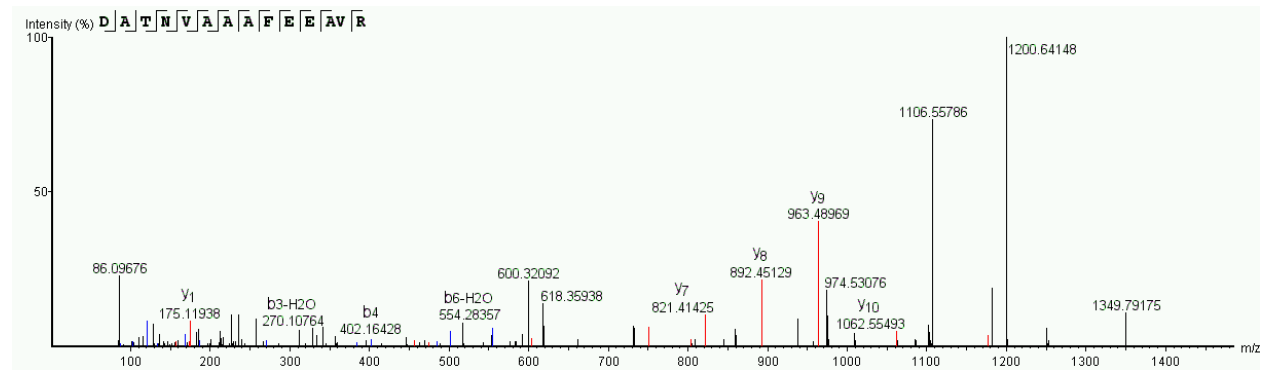

Identified protein:

|P51151|RAB9A\_HUMAN Ras-related protein Rab-9A

**77. MS/MS at  $m/z$  525.8191 (2+, RT=54.3192)**

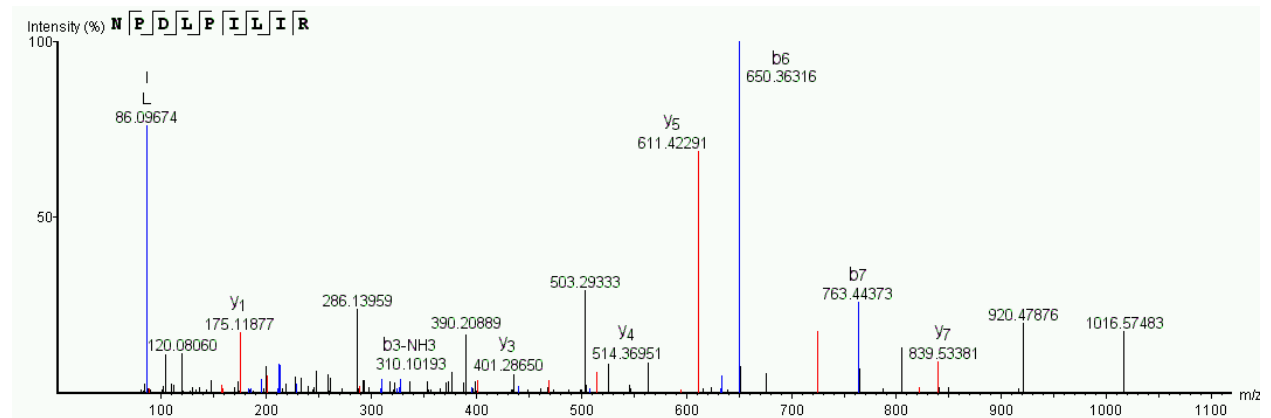

Identified protein

|O43678|NDUA2\_HUMAN NADH dehydrogenase [ubiquinone] 1 alpha subcomplex subunit 2

**78. MS/MS at m/z 717.3792 (2+, RT=54.6029)**

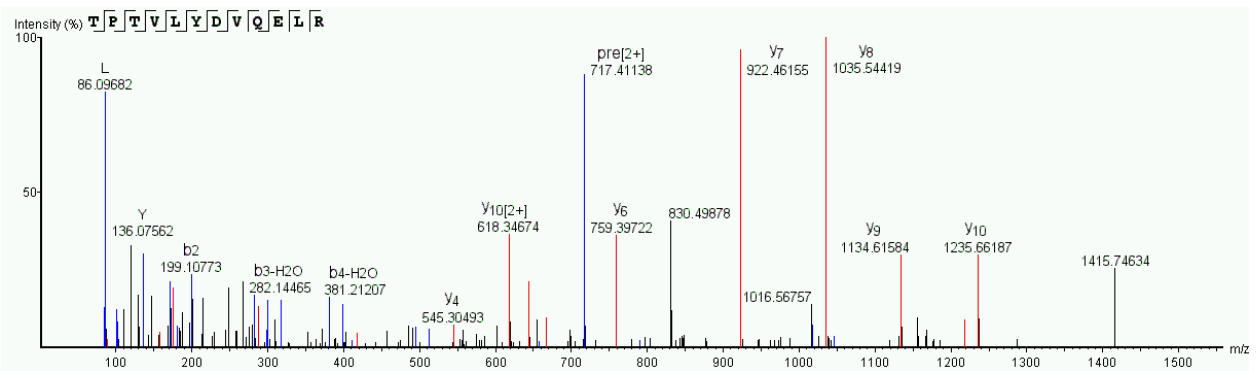

Identified protein:

|P09525|ANXA4\_HUMAN Annexin A4

**79. MS/MS at  $m/z$  359.21036 (2+, RT=28.0345)**

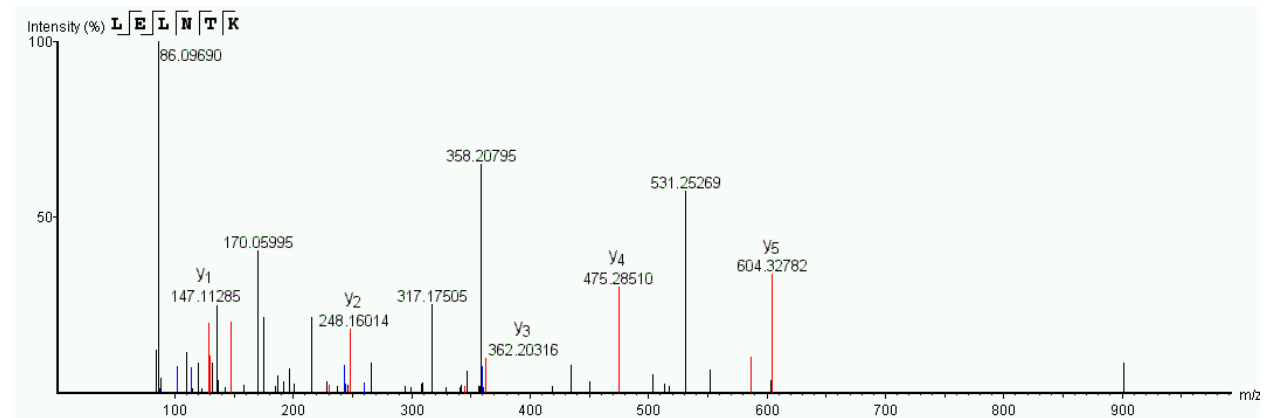

Identified protein:

|Q9H1H9-4| KI13A\_HUMAN Isoform 4 of Kinesin-like protein KIF13A



**80. MS/MS at  $m/z$  546.2639 (2+, RT=25.8778)**

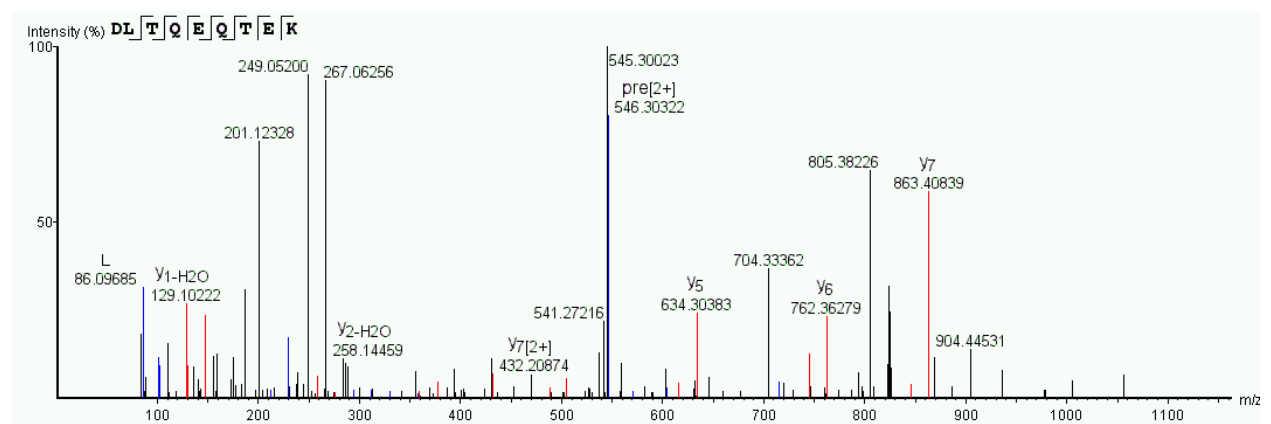

Identified protein

|Q96CS3|FAF2\_HUMAN FAS-associated factor 2

**81. MS/MS at m/z 609.3177 (2+, RT=39.7965)**

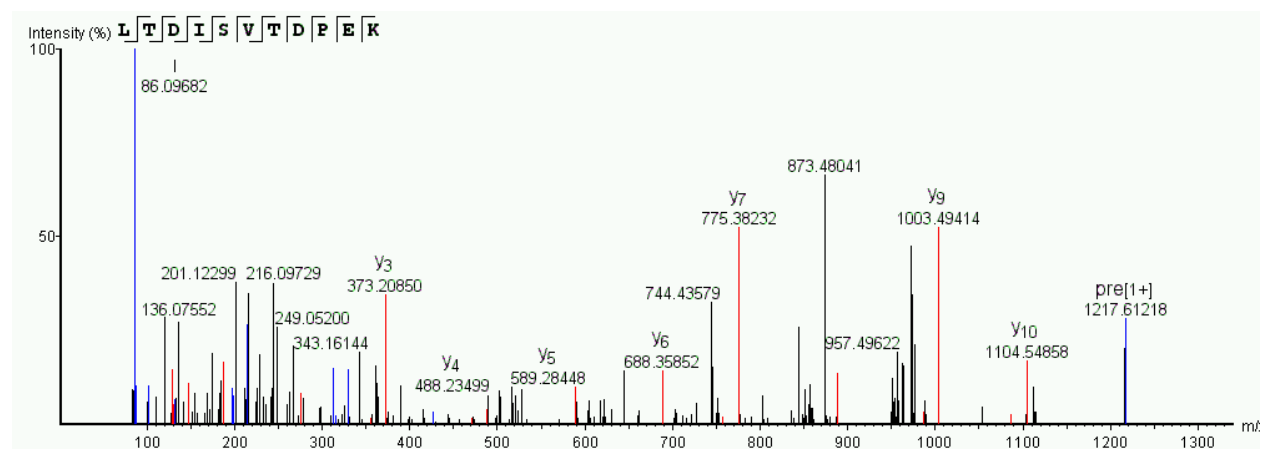

Identified protein:

|Q9Y333|LSM2\_HUMAN U6 snRNA-associated Sm-like protein LSM2

**82. MS/MS at  $m/z$  711.84015 (2+, RT=44.3263)**

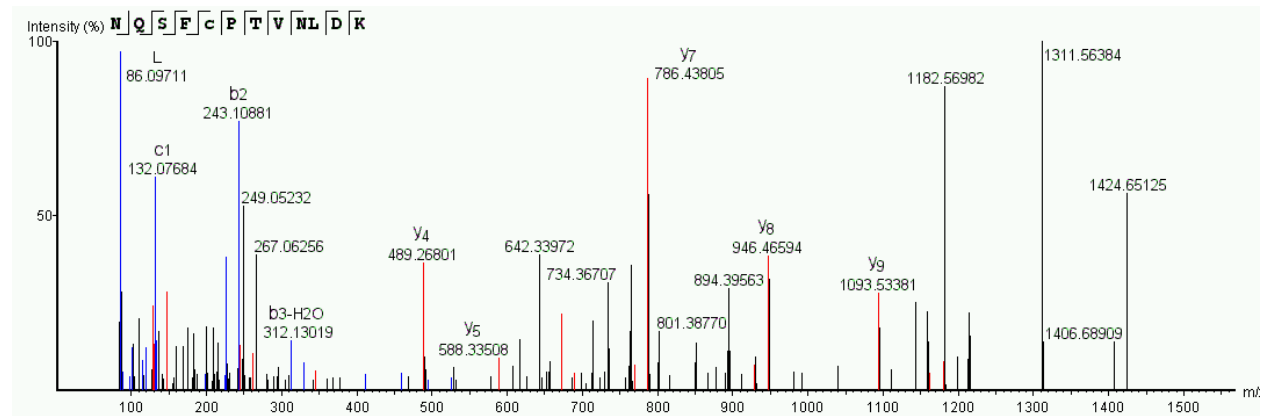

Identified protein:

|E9PLL6|E9PLL6\_HUMAN 60S ribosomal protein L27a

**83. MS/MS at  $m/z$  479.73984 (2+, RT=25.1691)**

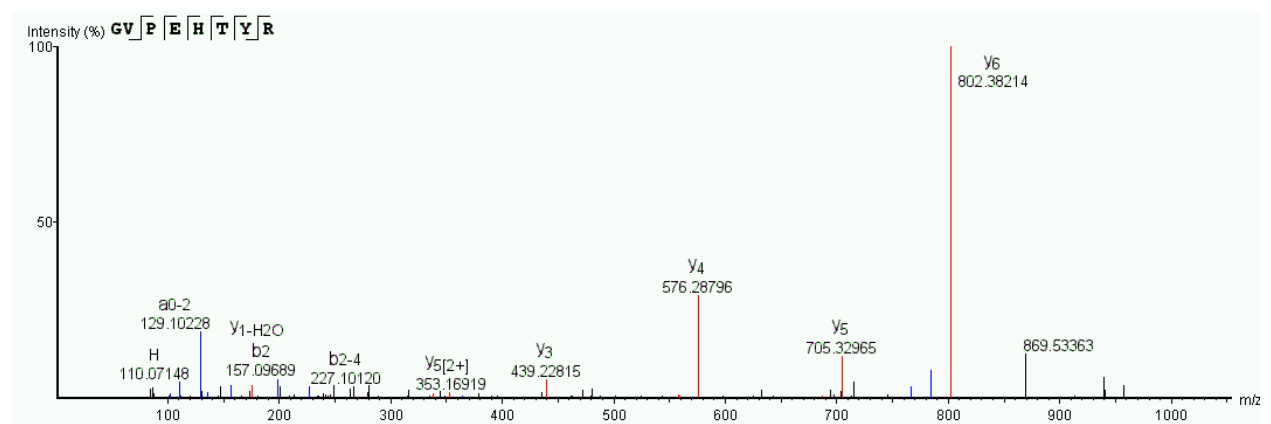

Identified protein:

|E9PIM6|E9PIM6\_HUMAN Thy-1 membrane glycoprotein (Fragment)

**84. MS/MS at  $m/z$  796.38477 (2+, RT=69.8738)**

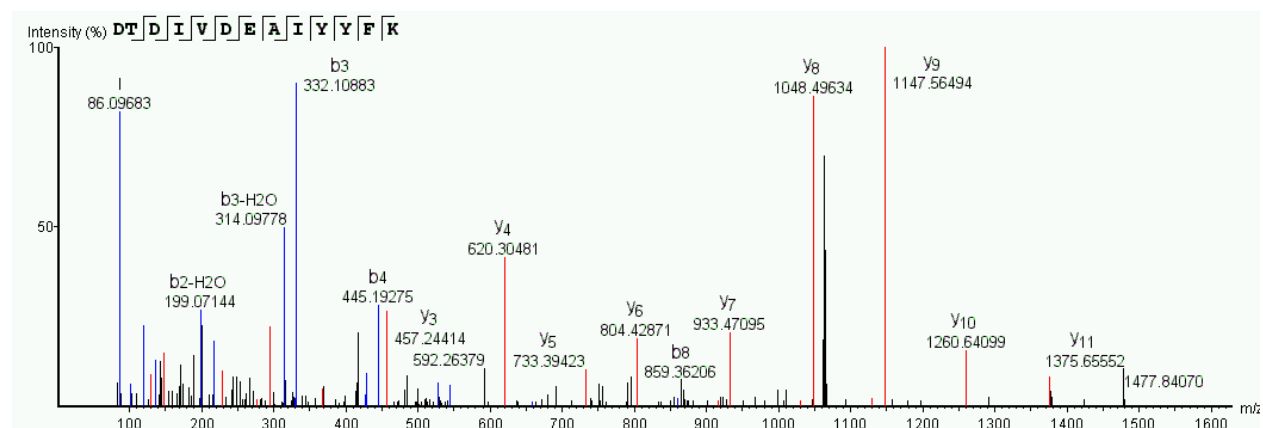

Identified protein:

|O15145|ARPC3\_HUMAN Actin-related protein 2/3 complex subunit 3

**85. MS/MS at  $m/z$  713.83234 (2+, RT=42.9187)**

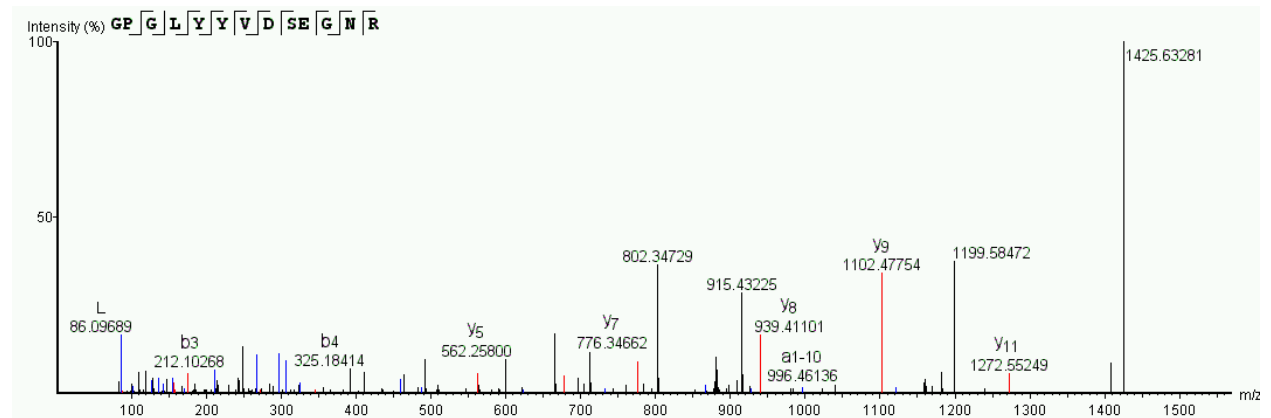

Identified protein:

|P28074|PSB5\_HUMAN Proteasome subunit beta type-5

**86. MS/MS at  $m/z$  471.7723 2+, RT=35.8178)**

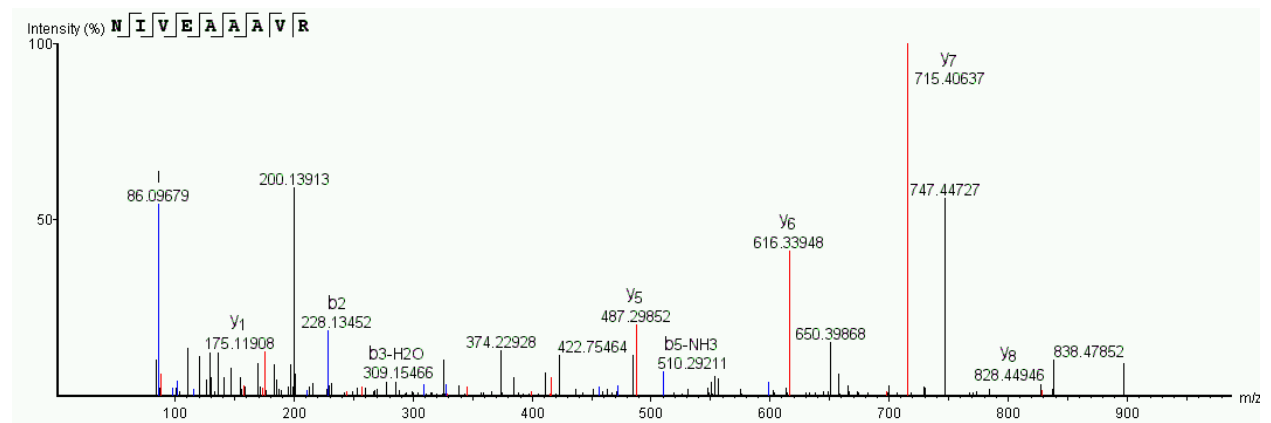

Identified protein:

|P62854|RS26\_HUMAN 40S ribosomal protein S26

**87. MS/MS at  $m/z$  515.28577 (2+, RT=29.8714)**

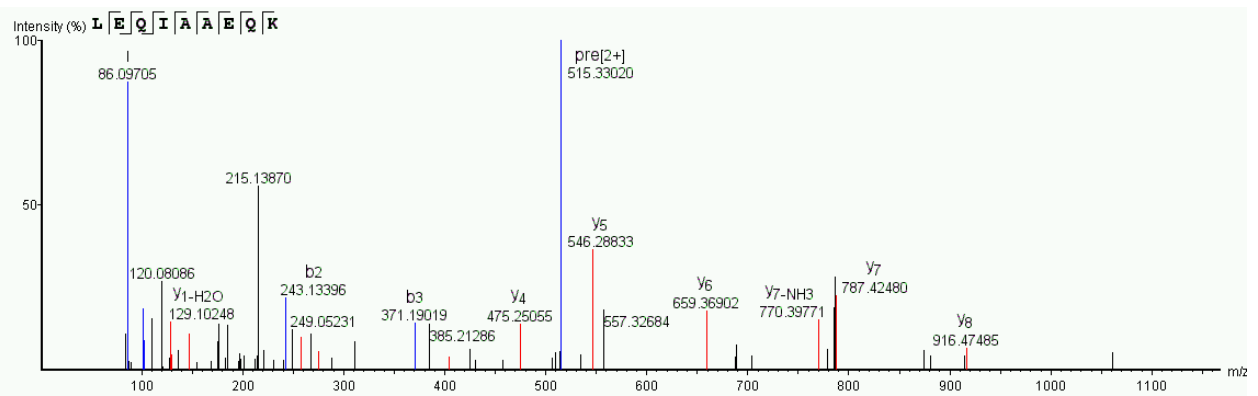

Identified protein:

[Q5QPM0] RALY\_HUMAN RNA-binding protein Raly (Fragment)



88. MS/MS at  $m/z$  1091.5151 (3+, RT=78.0722)

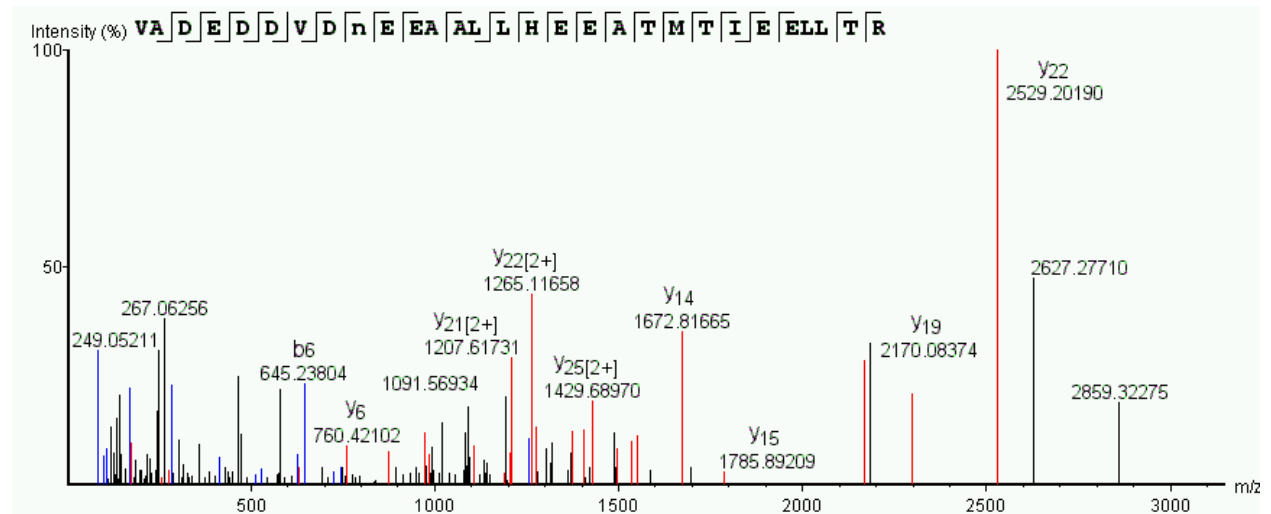

Identified protein:

|O15355|PPM1G\_HUMAN Protein phosphatase 1G

**89. MS/MS at  $m/z$  542.307 (2+, RT=50.321)**

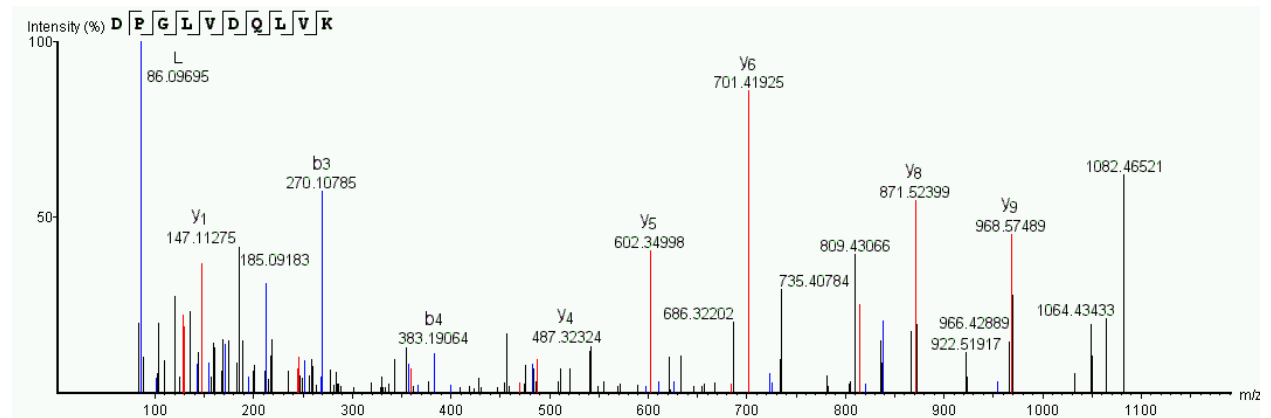

Identified protein:

|Q5T5C7|Q5T5C7\_HUMAN Serine--tRNA ligase, cytoplasmic

90. MS/MS at  $m/z$  517.76953 (2+, RT=52.4712)

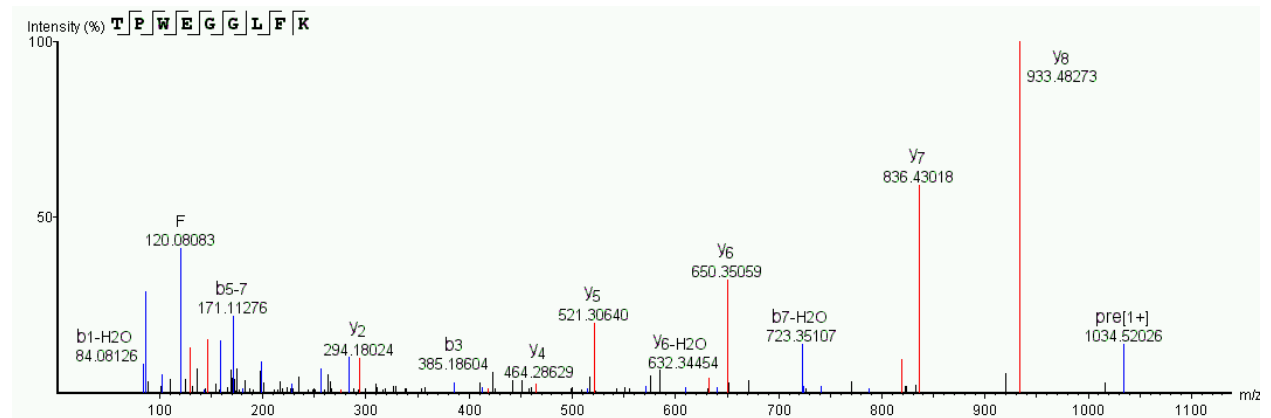

Identified protein:

|P63279|UBC9\_HUMAN SUMO-conjugating enzyme UBC9

**91. MS/MS at  $m/z$  693.82495 (2+, RT=34.5371)**

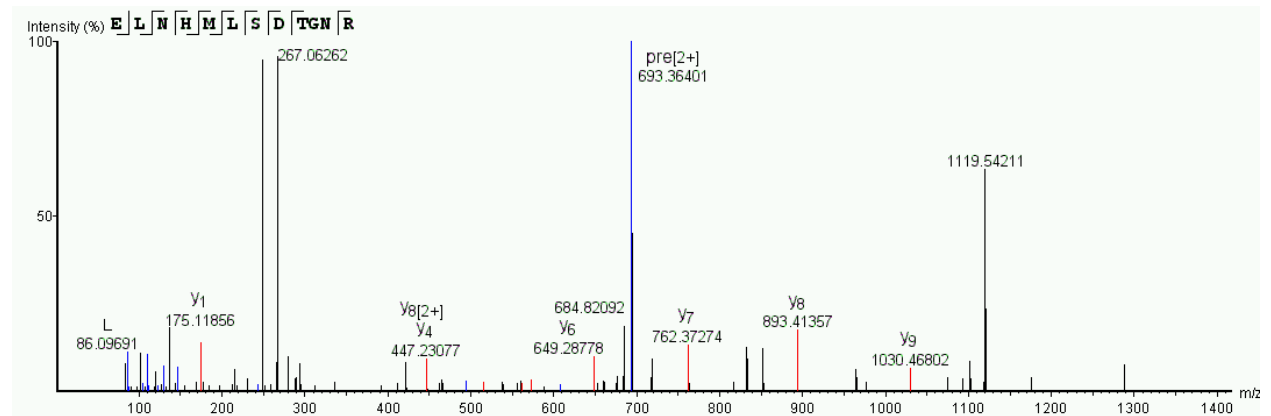

Identified protein:

|Q96FQ6|S10AG\_HUMAN Protein S100-A16

92. MS/MS at  $m/z$  829.09125 (3+, RT=81.1746)

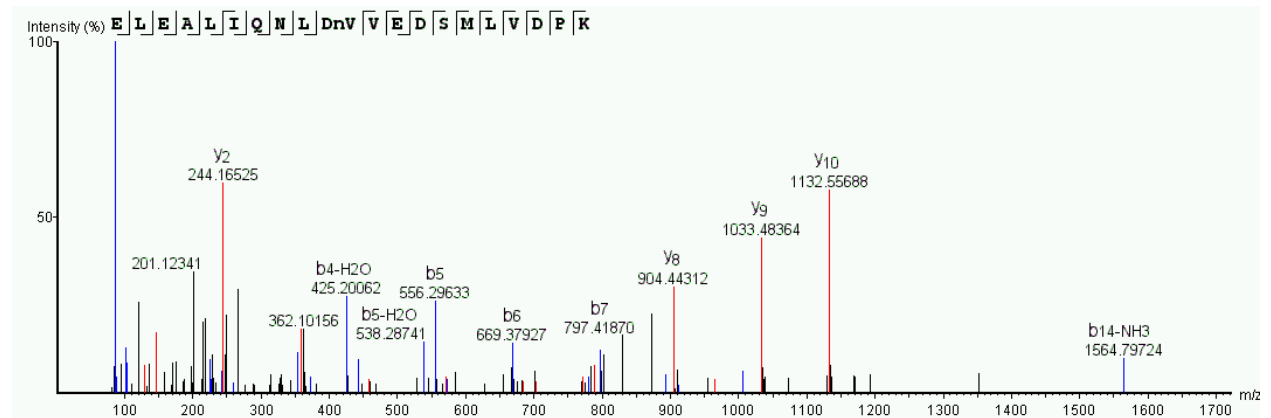

Identified protein:

|Q00341-2|VIGLN\_HUMAN Isoform 2 of Vigilin

93. MS/MS at  $m/z$  606.8201 (2+, RT=44.8892)

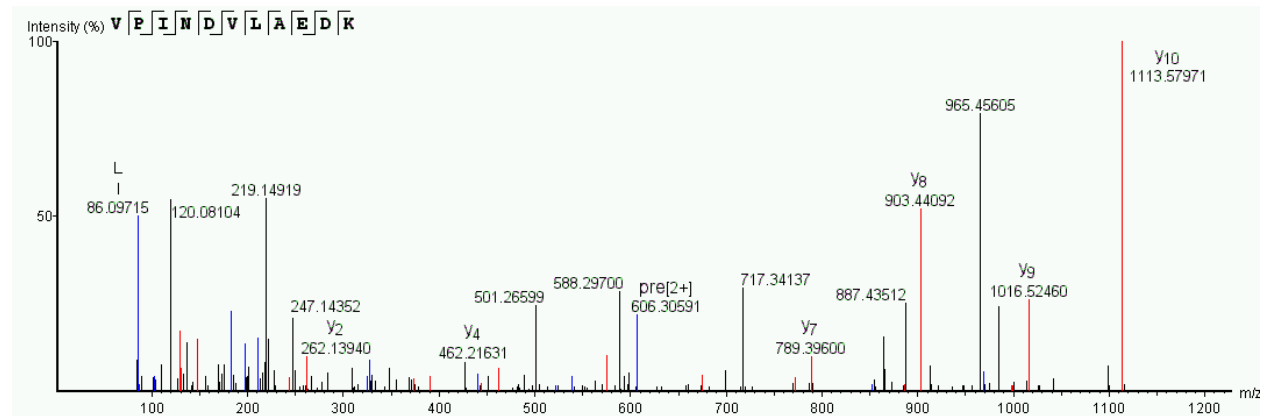

Identified protein:

|G5E9W7|G5E9W7\_HUMAN 28S ribosomal protein S22, mitochondrial, Coeluted with ...TFES...

**94. MS/MS at  $m/z$  576.3035 (3+, RT=73.9022)**

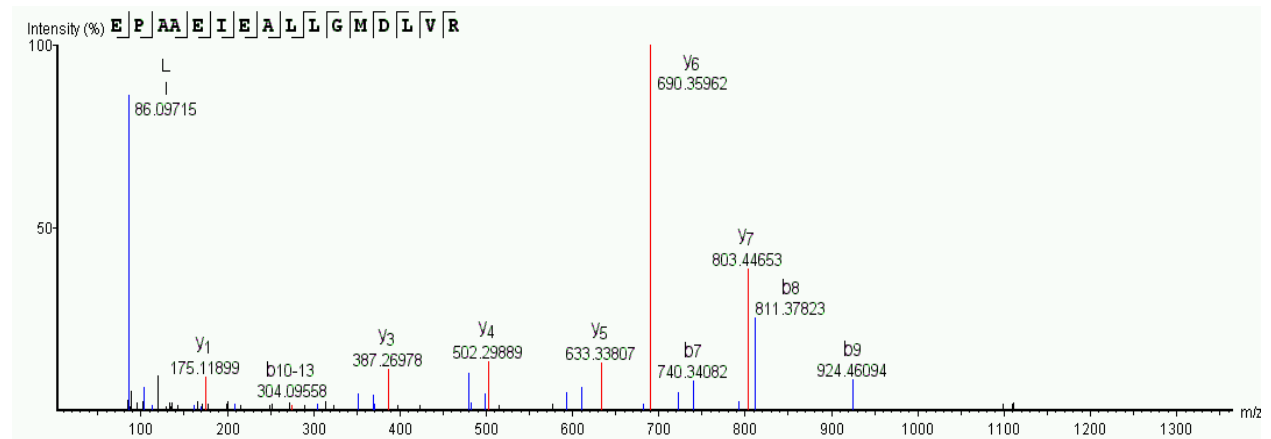

Identified protein:

|Q12765|SCRN1\_HUMAN Secernin-1

**95. MS/MS at  $m/z$  583.2647 (2+, RT=16.0582)**

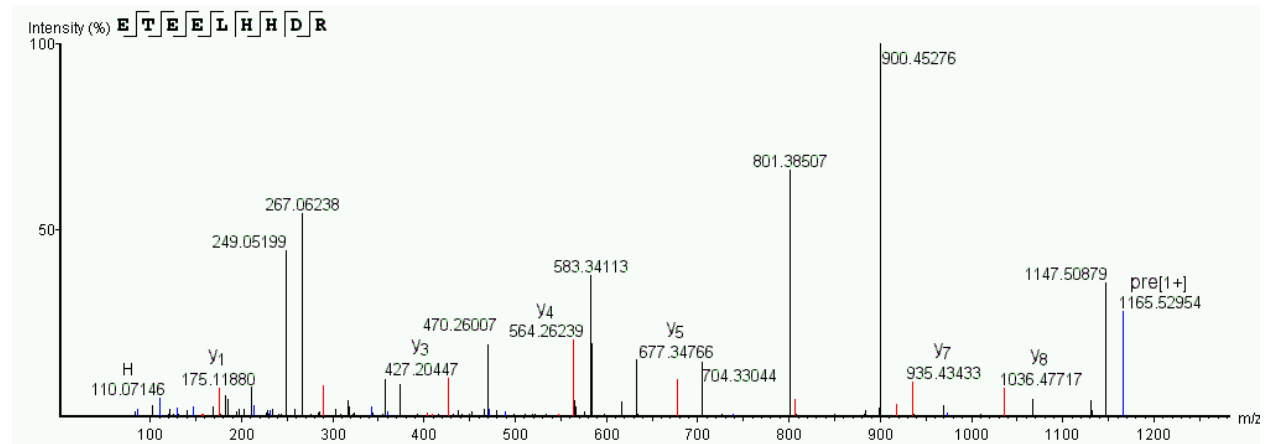

Identified protein:

|O60869-2|EDF1\_HUMAN Isoform 2 of Endothelial differentiation-related factor 1



96. MS/MS at  $m/z$  1008.5224 (3+, RT=63.6885)

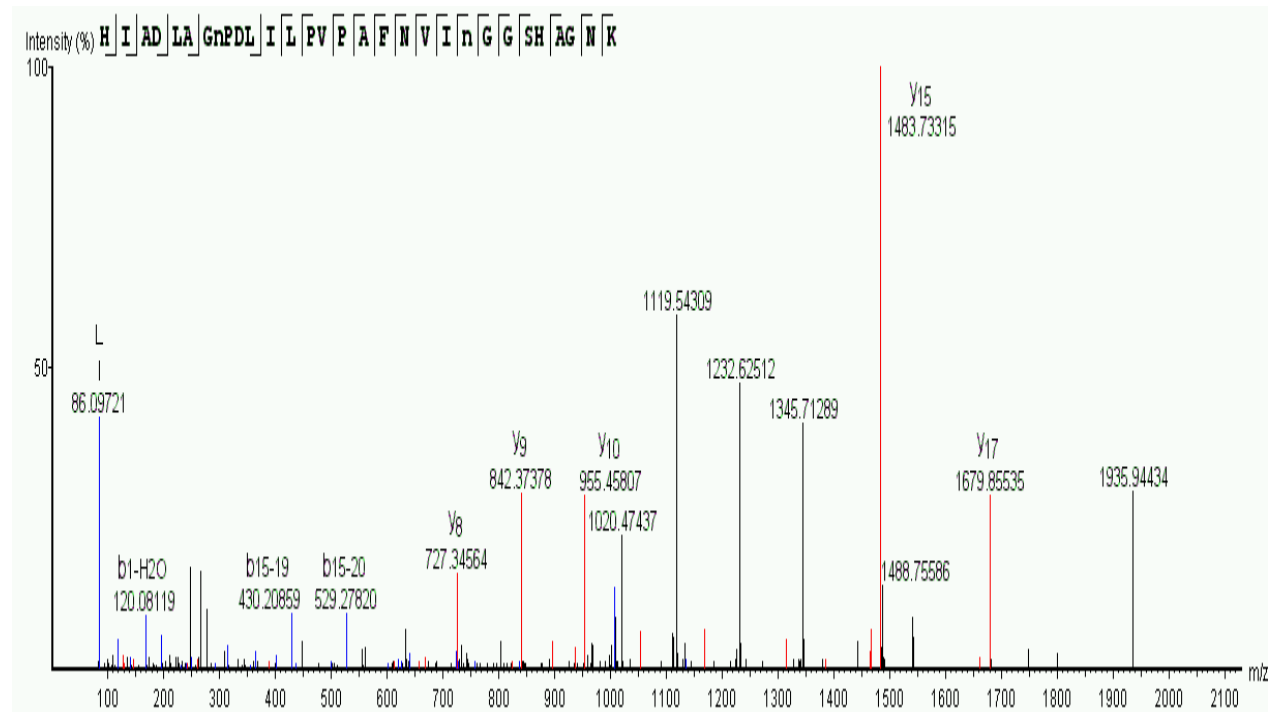

Identified protein

|P13929-3|ENOB\_HUMAN Isoform 3 of Beta-enolase OS=Homo sapiens GN=ENO3

**97. MS/MS at m/z 659.81793 (2+, RT=32.1636)**

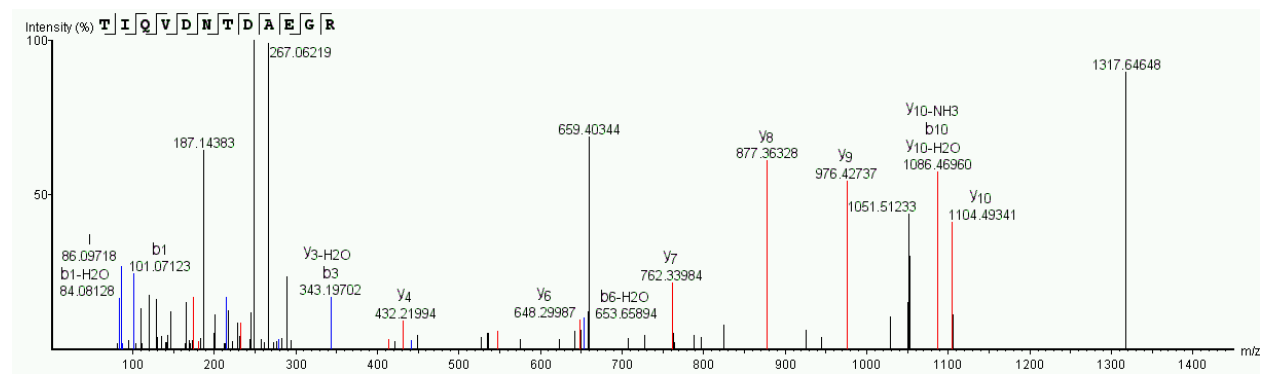

Identified protein:

|P28838-2|AMPL\_HUMAN Isoform 2 of Cytosol aminopeptidase

**98. MS/MS at  $m/z$  547.84973 (2+, RT=65.0898)**

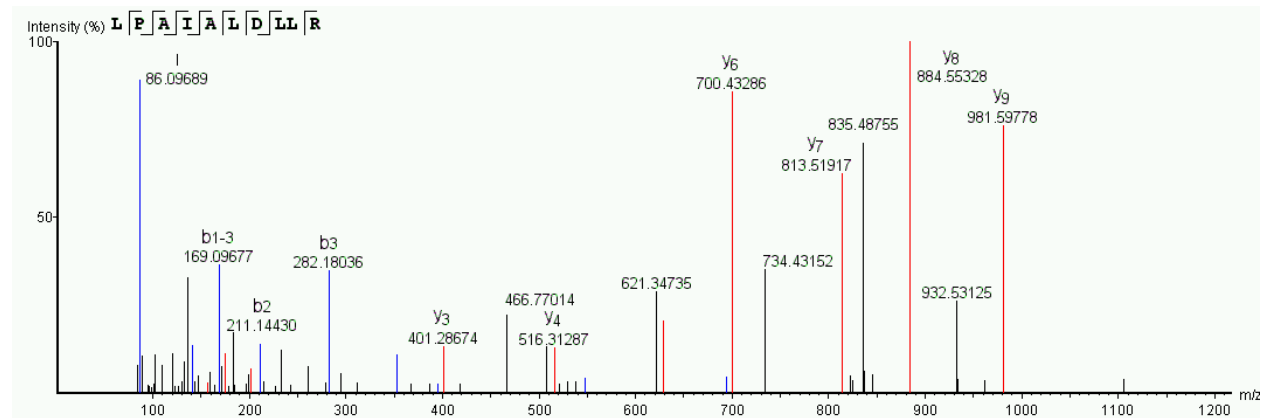

Identified protein:

|I3L1L3|I3L1L3\_HUMAN Myb-binding protein 1A (Fragment)

99. MS/MS at  $m/z$  513.23865 (2+, RT=25.3707)

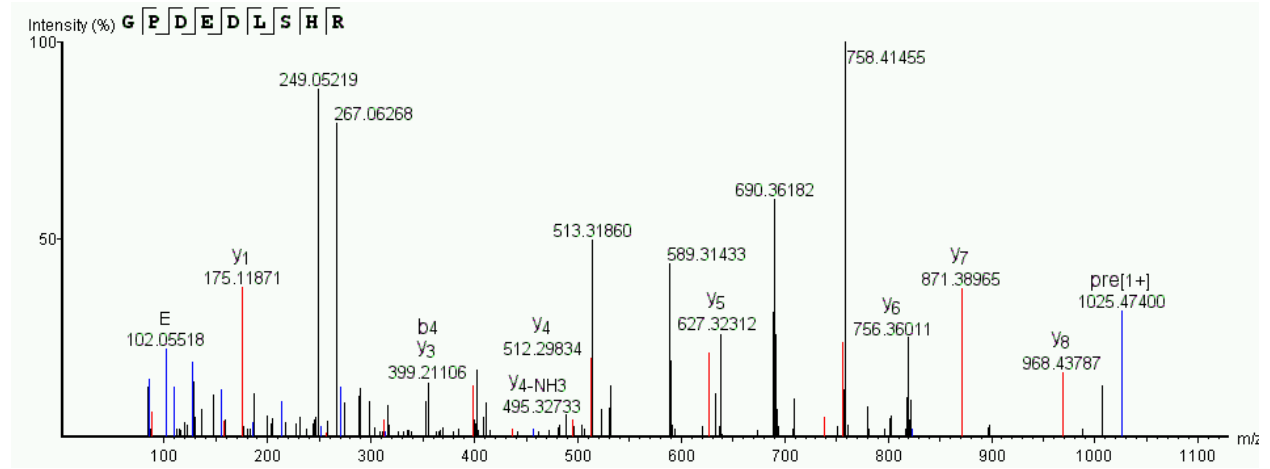

| # | Immonium  | b         | b-H2O     | b-NH3     | c         | b (2+)    | Seq | y         | y+H2O     | y-NH3     | y (2+)    | # |
|---|-----------|-----------|-----------|-----------|-----------|-----------|-----|-----------|-----------|-----------|-----------|---|
| 1 | 30.03429  | 58.02929  | 40.01873  | 41.00229  | 75.05629  | 29.51464  | G   |           |           |           |           | 9 |
| 2 | 70.06558  | 155.08180 | 137.07149 | 138.05504 | 172.10904 | 78.04102  | P   | 968.43787 | 950.43262 | 951.41620 | 484.72159 | 8 |
| 3 | 88.03967  | 270.10797 | 252.09766 | 253.08199 | 287.13599 | 135.55449 | D   | 871.38965 | 853.37982 | 854.36340 | 436.20383 | 7 |
| 4 | 102.05518 | 399.15378 | 381.14099 | 382.12457 | 416.17856 | 200.07578 | E   | 756.36011 | 738.35510 | 739.33649 | 378.68173 | 6 |
| 5 | 88.03976  | 514.17847 | 496.16791 | 497.15149 | 531.20551 | 257.58923 | D   | 627.32312 | 609.31030 | 610.29388 | 314.16043 | 5 |
| 6 | 86.09708  | 627.26257 | 609.25201 | 610.23560 | 644.28961 | 314.10431 | L   | 512.29834 | 494.28339 | 495.23083 | 256.61707 | 4 |
| 7 | 60.04485  | 714.29456 | 696.28400 | 697.26758 | 731.32159 | 357.64728 | S   | 399.21106 | 381.19931 | 382.18289 | 200.10493 | 3 |
| 8 | 110.07159 | 851.35352 | 833.34296 | 834.32654 | 868.38055 | 426.17676 | H   | 312.17694 | 294.16730 | 295.15088 | 156.58893 | 2 |
| 9 | 129.11392 |           |           |           |           |           | R   | 175.11871 | 157.10838 | 158.09238 | 88.03967  | 1 |

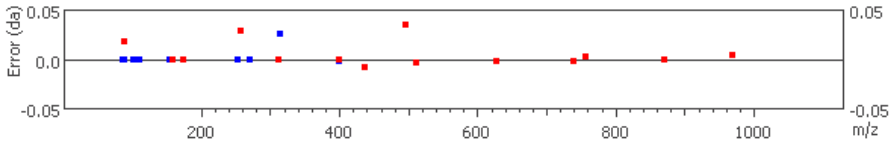

Identified protein:

|Q9HC07|TM165\_HUMAN Transmembrane protein 165

100. MS/MS at  $m/z$  757.9374 (2+, RT=69.9515)

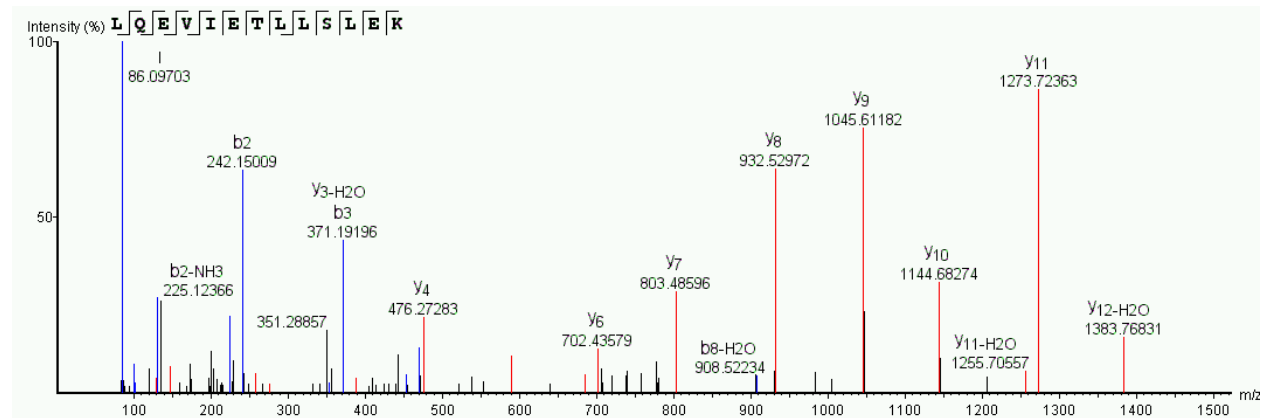

Identified protein:

|O00232| PSD12\_HUMAN 26S proteasome non-ATPase regulatory subunit 12

101. MS/MS at  $m/z$  520.2681 (2+, RT=24.6667)

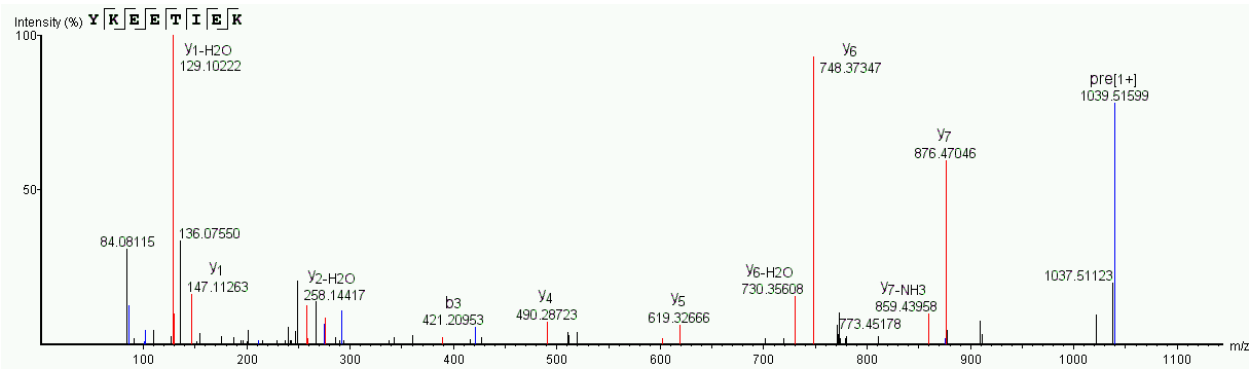

Identified protein:

|P61254|RL26\_HUMAN 60S ribosomal protein L26

**102. MS/MS at  $m/z$  672.86017 (2+, RT=71.0108)**

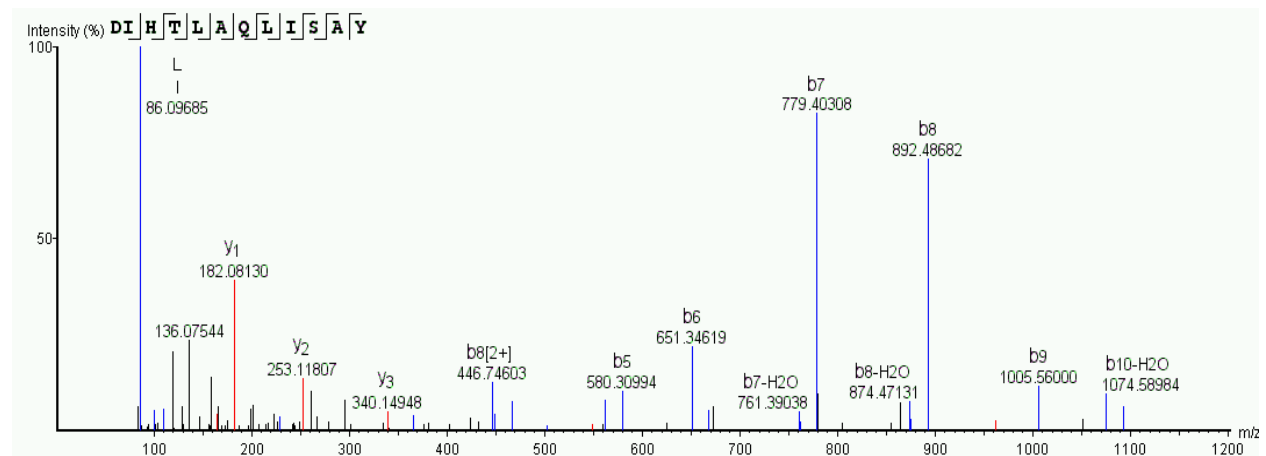

Identified protein:

|O76094|SRP72\_HUMAN Signal recognition particle subunit SRP72

**103. MS/MS at  $m/z$  588.82166 (2+, RT=30.8422)**

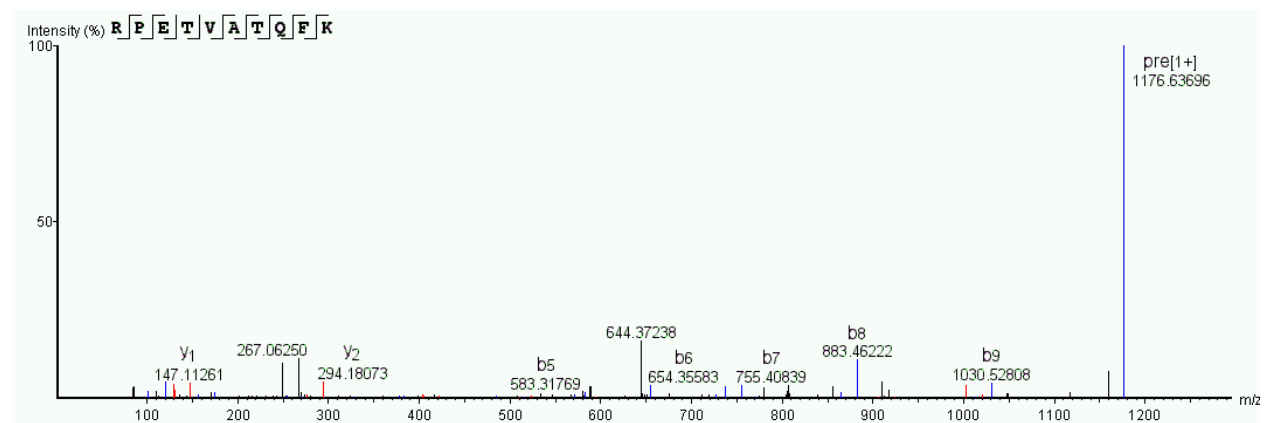

Identified protein:

|O00159-2|MYO1C\_HUMAN Isoform 2 of Unconventional myosin-Ic



**104. MS/MS at  $m/z$  552.3267 (2+, RT=61.2268)**

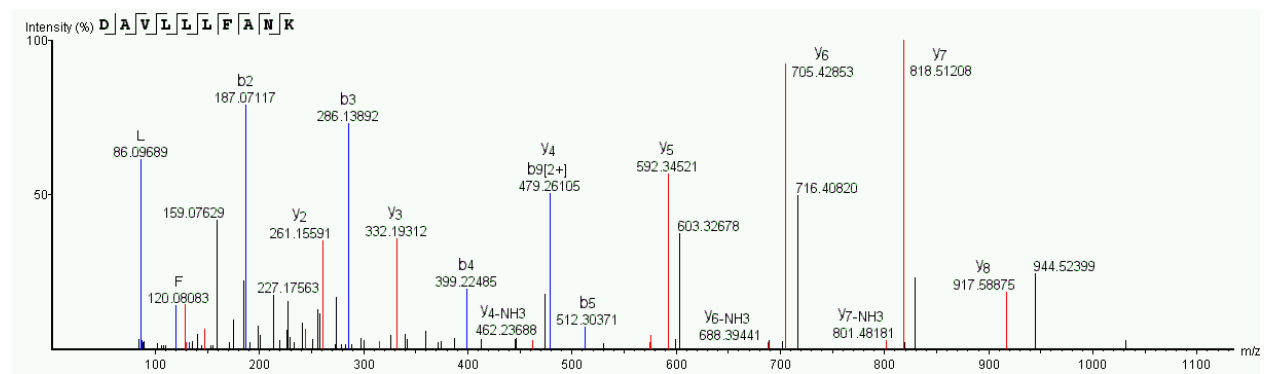

Identified protein:

|P18085|ARF4\_HUMAN ADP-ribosylation factor 4 O

**105. MS/MS at  $m/z$  554.77264 (2+, RT=43.1505)**

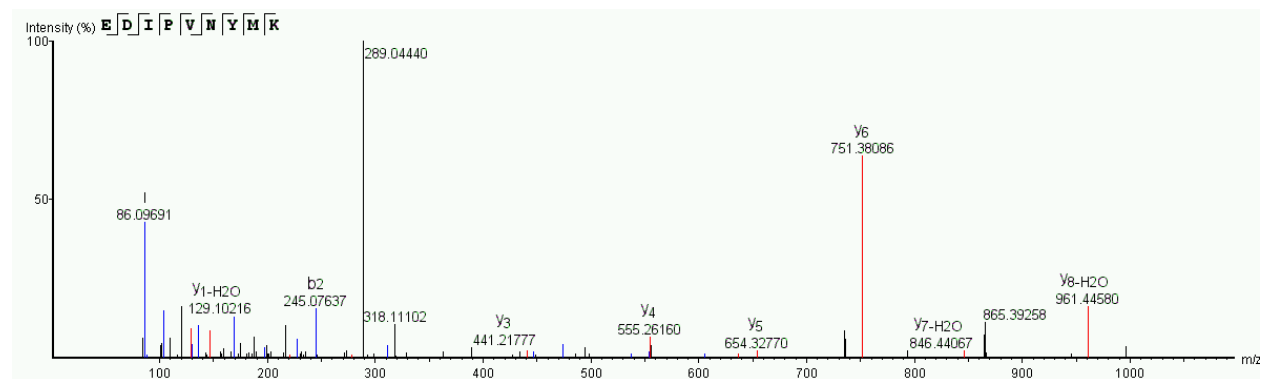

Identified protein:

|H3BS10|H3BS10\_HUMAN Beta-hexosaminidase

**106. MS/MS at  $m/z$  1021.54236 (3+, RT=74.9127)**

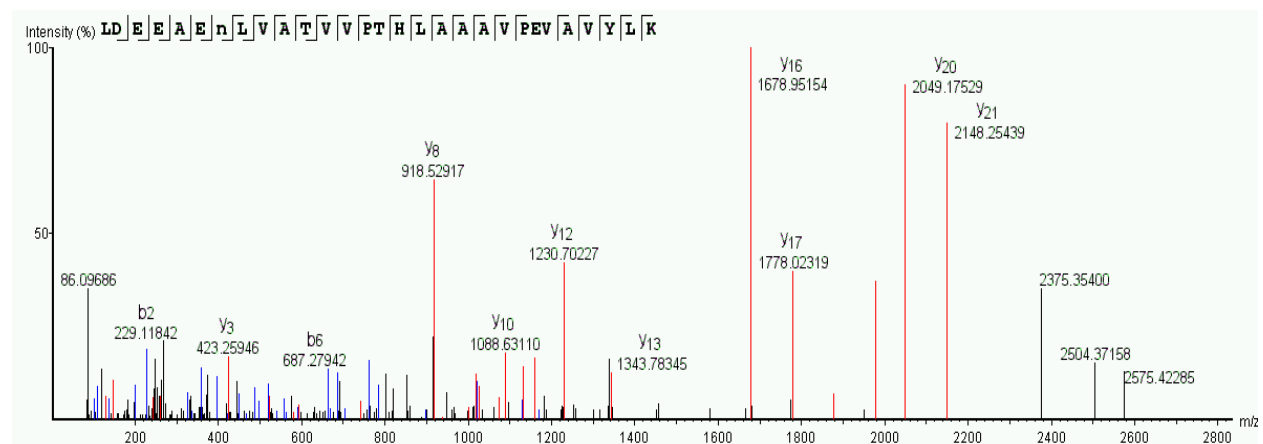

Identified protein:

|Q15257|PTPA\_HUMAN Serine/threonine-protein phosphatase 2A activator

107. MS/MS at m/z 950.21844 (3+, RT=91.633)

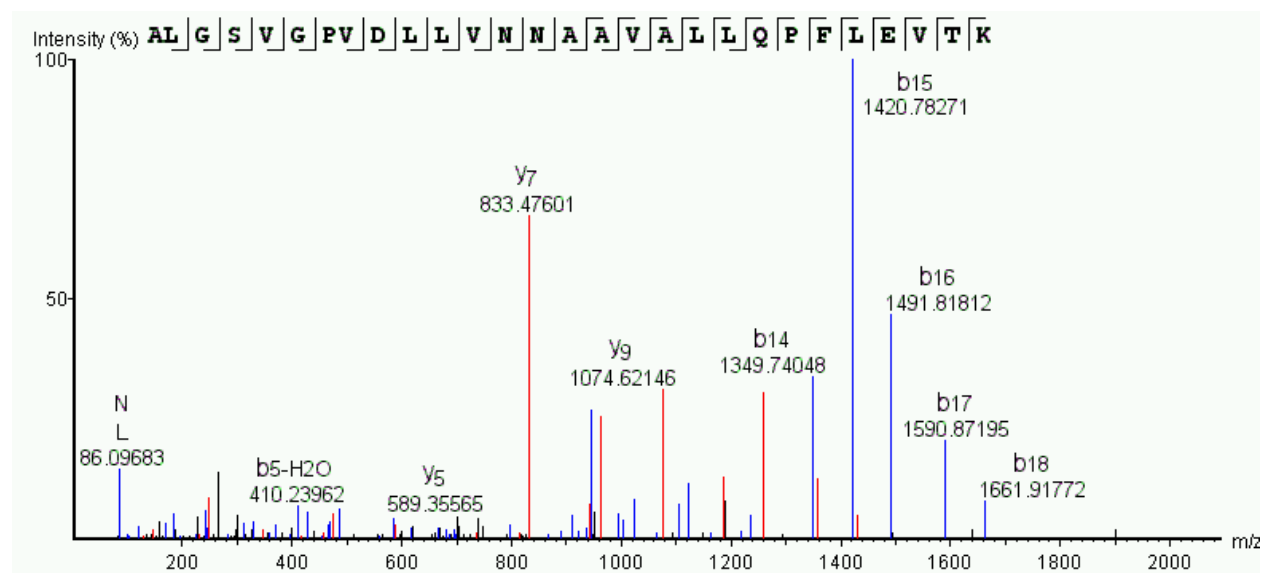

Identified protein:

[J3KS22]DCXR\_HUMAN L-xylulose reductase (Fragment)

**108. MS/MS at  $m/z$  1214.0798 (2+, RT=82.9403)**

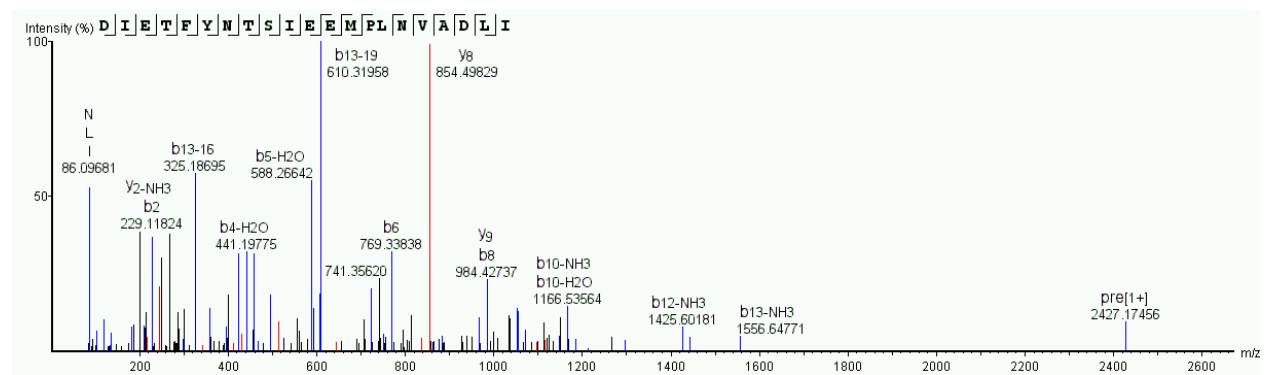

Identified protein:

|P60842|IF4A1\_HUMAN Eukaryotic initiation factor 4A-I

109. MS/MS at  $m/z$  577.81024 (2+, RT=36.7521)

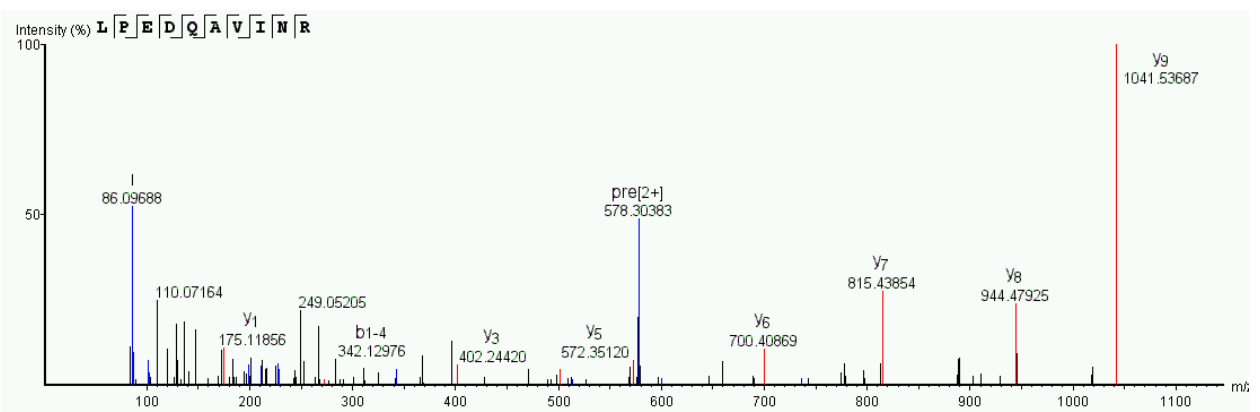

[I3NI32] DHODH\_HUMAN Dihydroorotate dehydrogenase (quinone), mitochondrial

**110. MS/MS at  $m/z$  762.90265 (2+, RT=76.8415)**

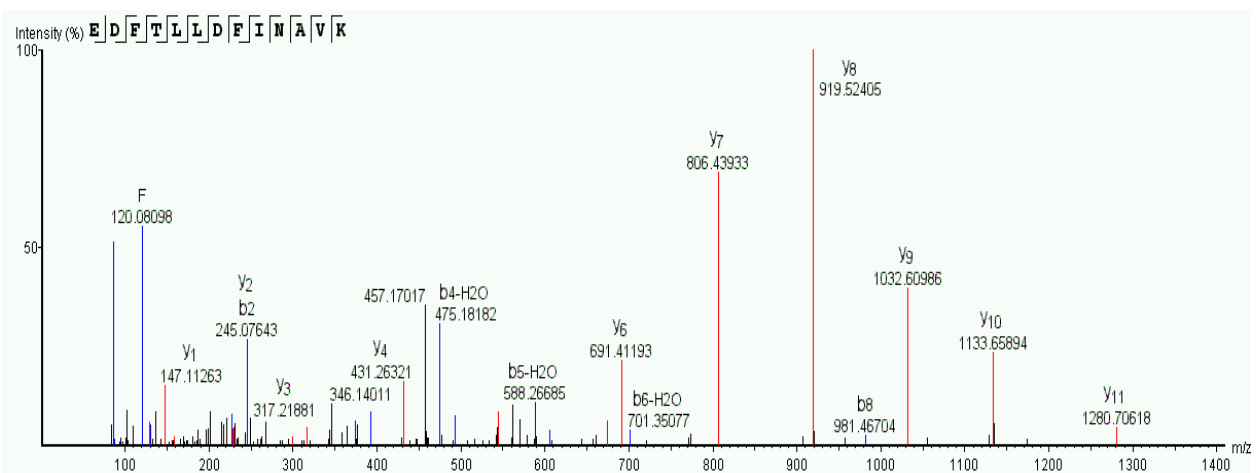

Identified protein:

|A0AVT1-2|UBA6\_HUMAN Isoform 2 of Ubiquitin-like modifier-activating enzyme 6

**111. MS/MS at  $m/z$  517.27954 (2+, RT=40.9336)**

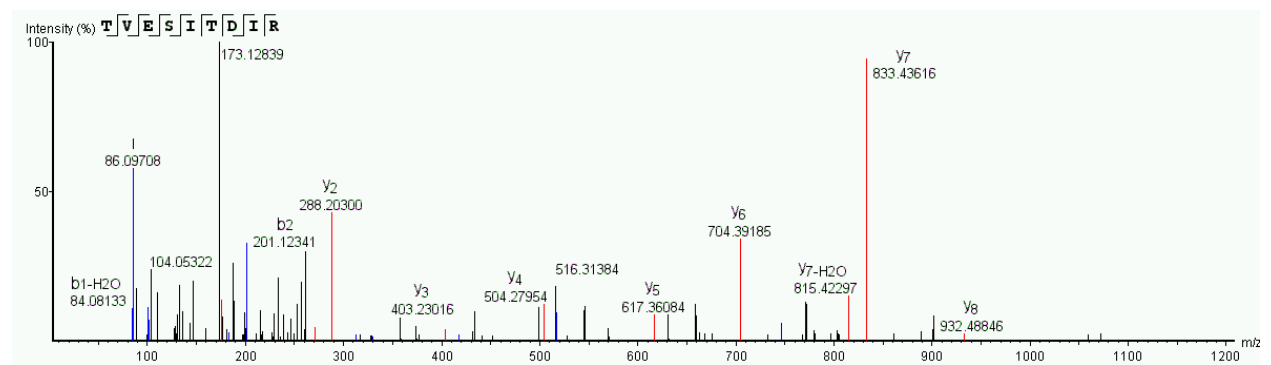

Identified protein:

[P11279]LAMP1\_HUMAN Lysosome-associated membrane glycoprotein



**112. MS/MS at  $m/z$  565.31226 (2+, RT=35.5789)**

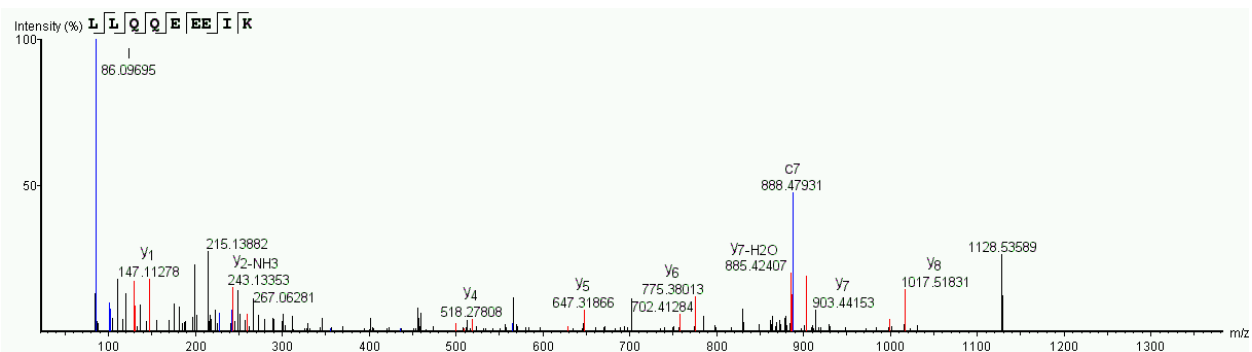

Identified protein:

|P54136|SYRC\_HUMAN Arginine--tRNA ligase, cytoplasmic

**113. MS/MS at  $m/z$  474.26797 (3+, RT=48.7727)**

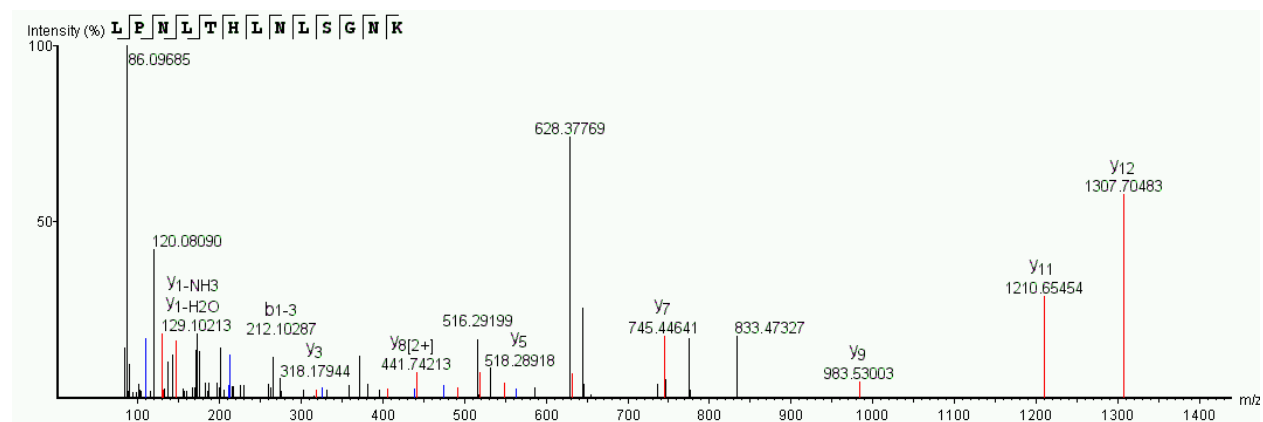

Identified protein:

|Q92688-2|AN32B\_HUMAN Isoform 2 of Acidic leucine-rich nuclear phosphoprotein 32 family member

B

**114. MS/MS at  $m/z$  443.7477 (2+, RT=39.8605)**

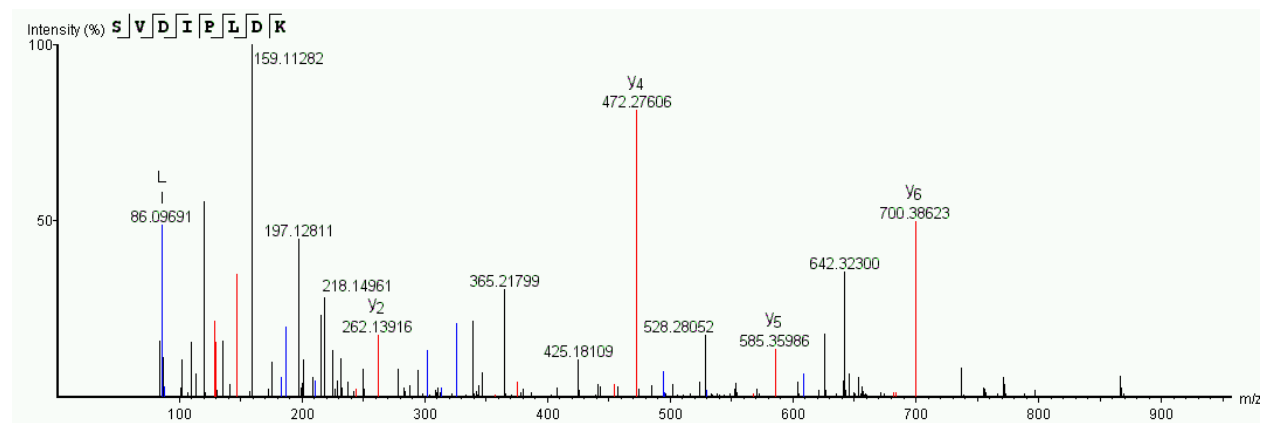

Identified protein:

|P61353|RL27\_HUMAN 60S ribosomal protein L27

**115. MS/MS at  $m/z$  580.28204 (2+, RT=22.2431)**

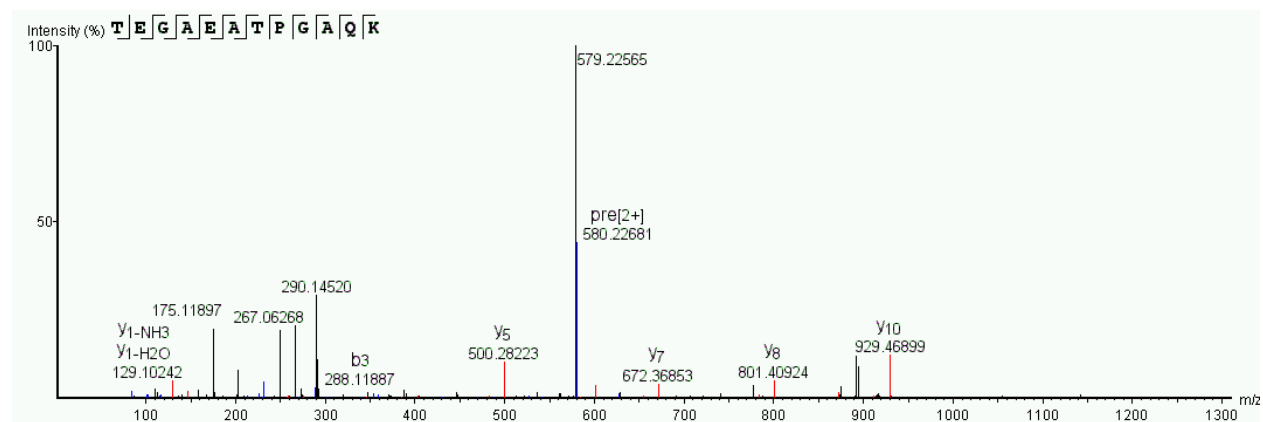

Identified protein:

|Q16666-3|IF16\_HUMAN Isoform 3 of Gamma-interferon-inducible protein 16

**116. MS/MS at  $m/z$  604.35095 (3+, RT=86.3234)**

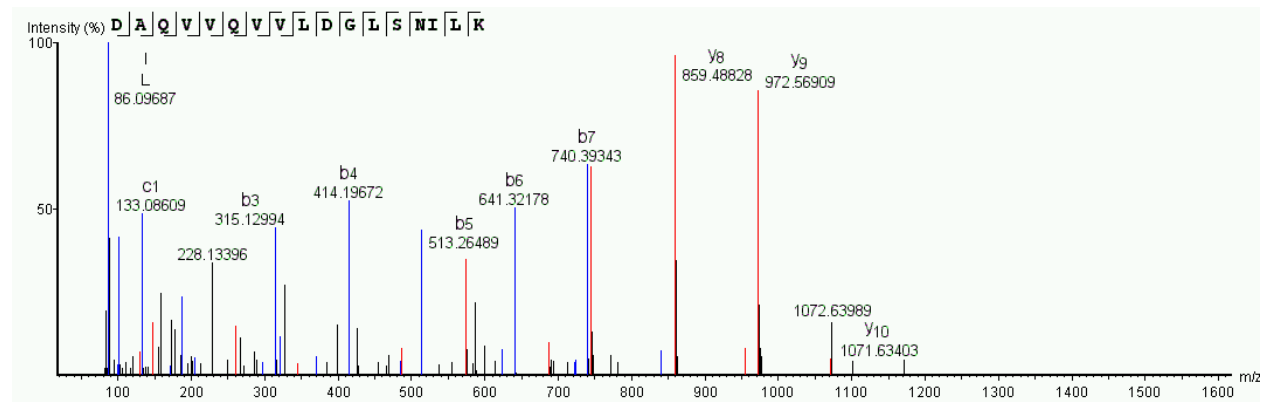

Identified protein:

|O00629| IMA3\_HUMAN Importin subunit alpha-3

**117. MS/MS at  $m/z$  944.9925 (2+, RT=83.3799)**

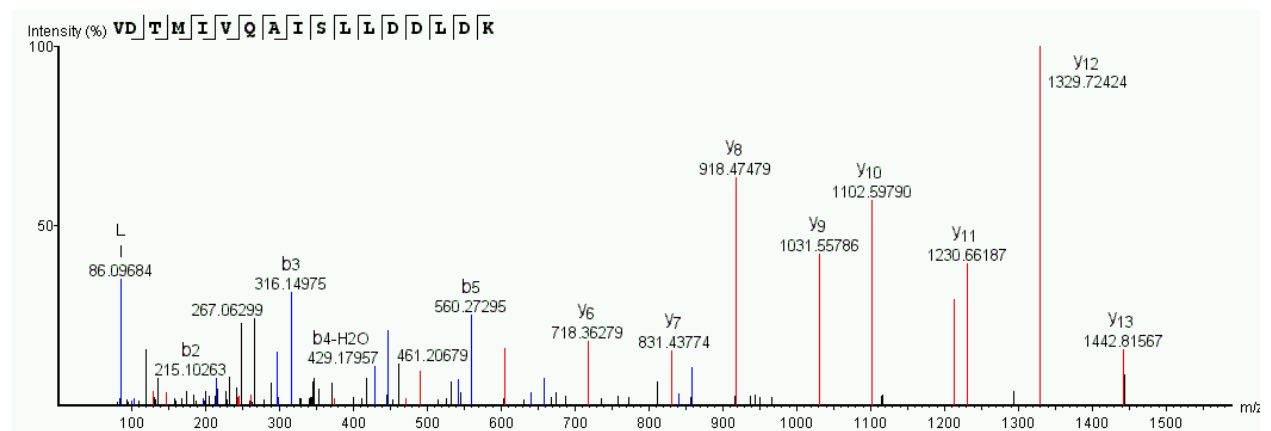

Identified protein

|Q9Y2X3|NOP58\_HUMAN Nucleolar protein 58

**118. MS/MS at  $m/z$  450.9251 (2+, RT=45.9301)**

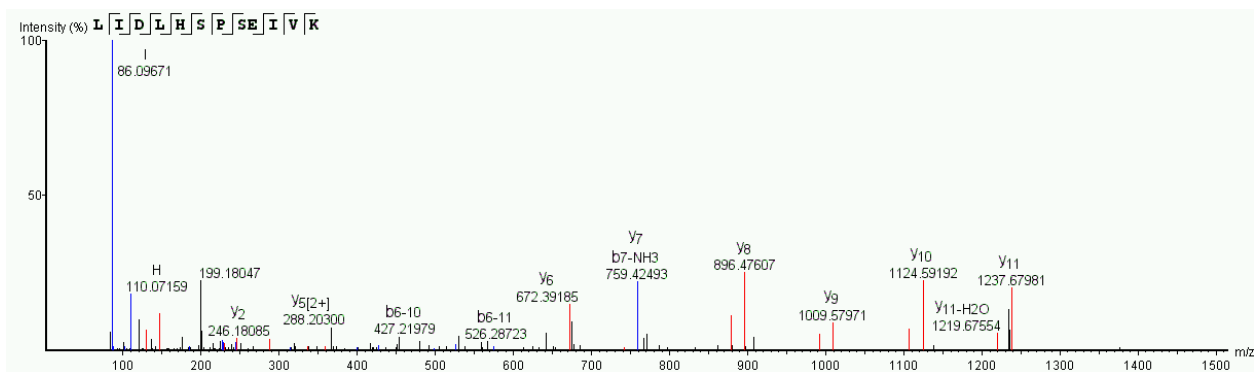

Identified protein:

|P60866|RS20\_HUMAN 40S ribosomal protein S20

**119. MS/MS at  $m/z$  684.02783 (2+, RT=89.9391)**

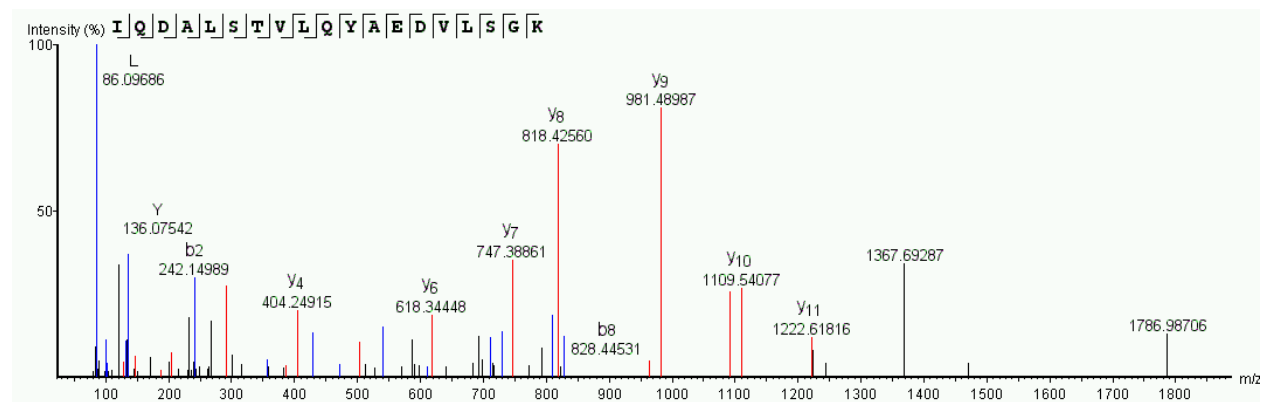

Identified protein:

|O00303|EIF3F\_HUMAN Eukaryotic translation initiation factor 3 subunit F



**120. MS/MS at m/z 565.31226 (2+, RT=35.5789)**

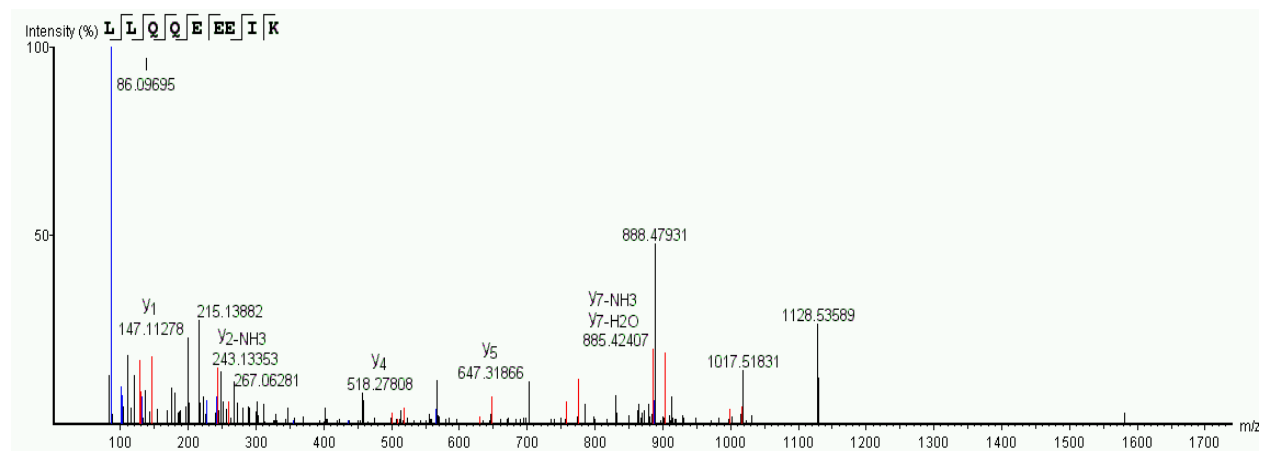

| # | Immonium  | b         | b-H2O     | b-NH3     | c          | b (2+)    | Seq | y          | y-H2O     | y-NH3     | y (2+)    | # |
|---|-----------|-----------|-----------|-----------|------------|-----------|-----|------------|-----------|-----------|-----------|---|
| 1 | 86.09689  | 114.09189 | 96.08133  | 97.06489  | 131.11809  | 57.54594  | L   |            |           |           |           | 9 |
| 2 | 86.09689  | 227.17508 | 209.16539 | 210.14894 | 244.20294  | 114.08797 | L   | 1016.51294 | 998.51526 | 999.50568 | 508.76022 | 8 |
| 3 | 101.07137 | 355.23199 | 337.22394 | 338.20752 | 372.26151  | 178.11725 | Q   | 903.44153  | 885.42407 | 886.41418 | 452.22089 | 7 |
| 4 | 101.07140 | 483.29309 | 465.28253 | 466.26611 | 500.32010  | 242.14919 | Q   | 775.38013  | 757.34778 | 758.35077 | 388.19159 | 6 |
| 5 | 102.05556 | 612.33569 | 594.32513 | 595.30872 | 629.36273  | 306.66785 | E   | 647.31866  | 629.29761 | 630.29761 | 324.16229 | 5 |
| 6 | 102.05541 | 741.37830 | 723.36774 | 724.35132 | 758.40533  | 371.18915 | E   | 518.27808  | 500.26416 | 501.25504 | 259.64102 | 4 |
| 7 | 102.05541 | 870.42084 | 852.41028 | 853.39386 | 887.45703  | 435.68494 | E   | 389.23944  | 371.22888 | 372.21246 | 195.11972 | 3 |
| 8 | 86.09695  | 983.50488 | 965.49432 | 966.47791 | 1000.53192 | 492.25244 | I   | 260.19702  | 242.14919 | 243.13353 | 130.59842 | 2 |
| 9 | 101.10778 |           |           |           |            |           | K   | 147.11278  | 129.10245 | 130.08635 | 74.05640  | 1 |

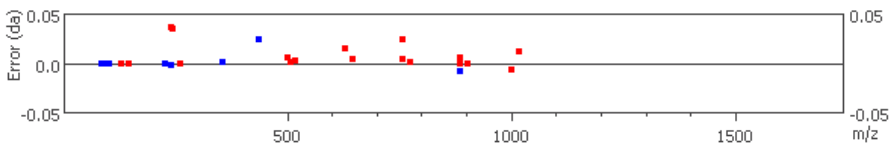

Identified protein:

|P54136|SYRC\_HUMAN Arginine--tRNA ligase, cytoplasmic

**121. MS/MS at m/z 737.3714 (2+, RT=55.1983)**

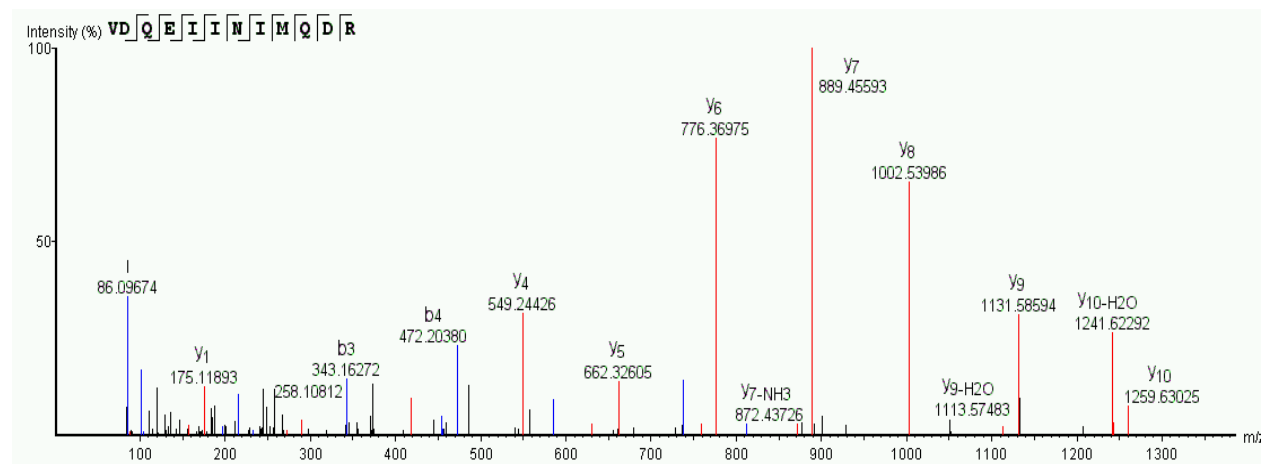

|H3BPJ9| NDUFB10\_HUMAN NADH dehydrogenase [ubiquinone] 1 beta subcomplex subunit 10

122. MS/MS at  $m/z$  744.89984 (2+, RT=72.6442)

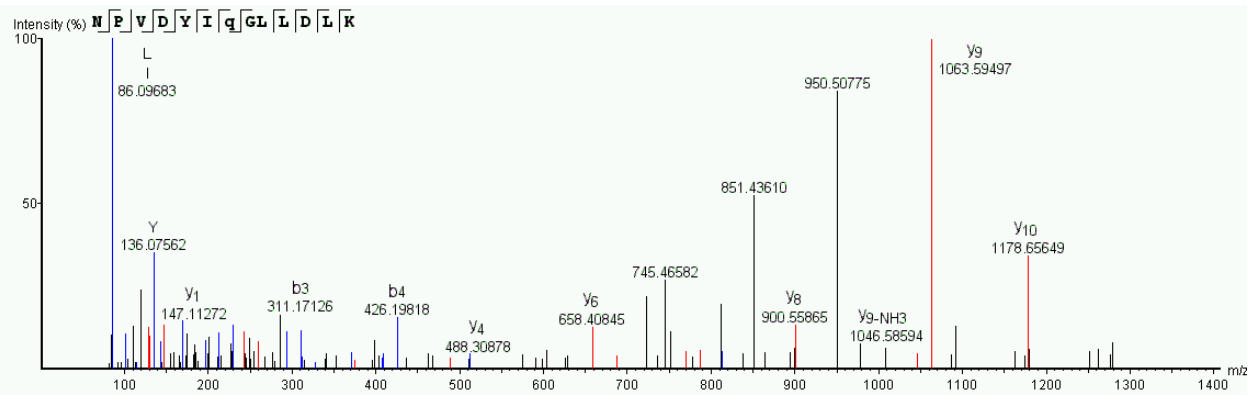

|Q13618-3|CUL3\_HUMAN Isoform 3 of Cullin-3

123. MS/MS at m/z 663.84924 (2+, RT=59.8639)

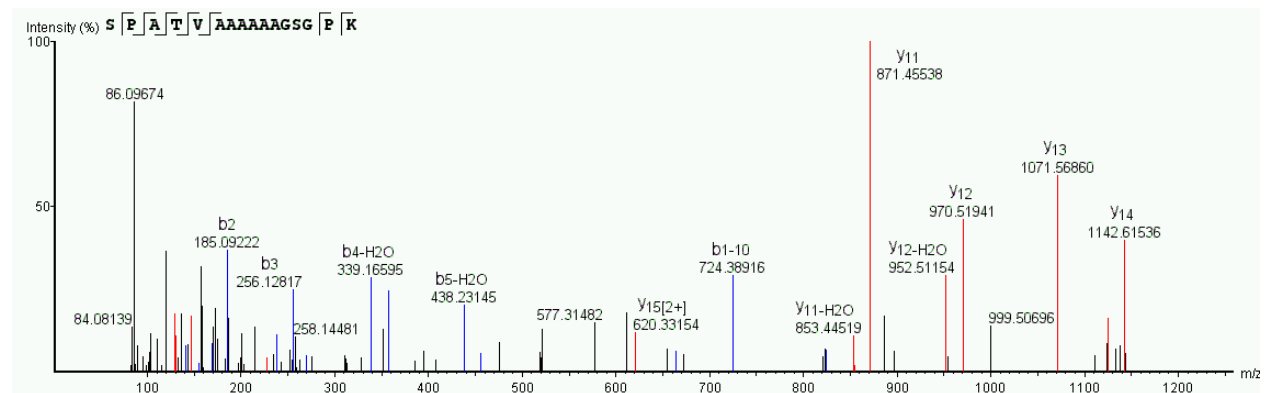

Identified protein:

|Q13045-3|FLII\_HUMAN Isoform 3 of Protein flightless-1

124. MS/MS at  $m/z$  437.2335 (2+, RT=36.2425)

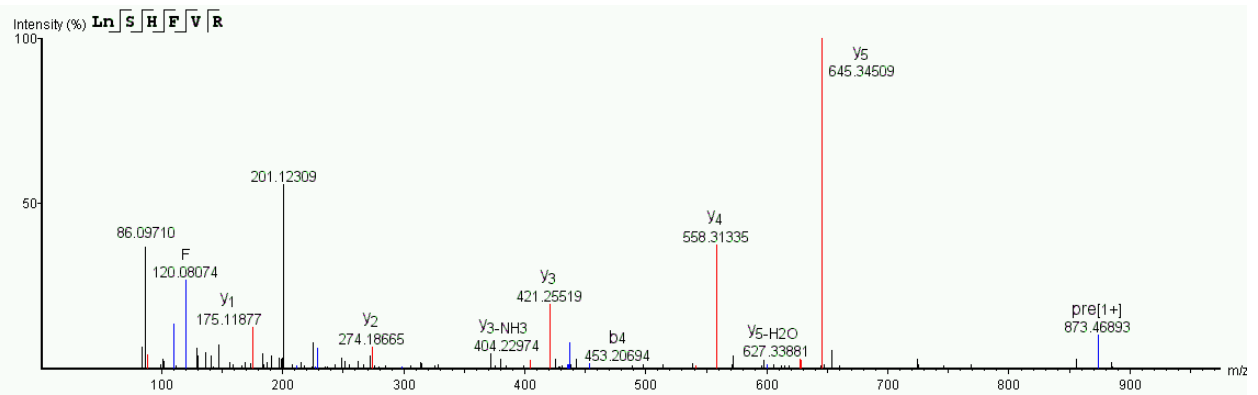

Identified protein:

|Q9BRK5-6|CAB45\_HUMAN Isoform 6 of 45 kDa calcium-binding protein

**125. MS/MS at  $m/z$  477.78574 (2+, RT=28.985)**

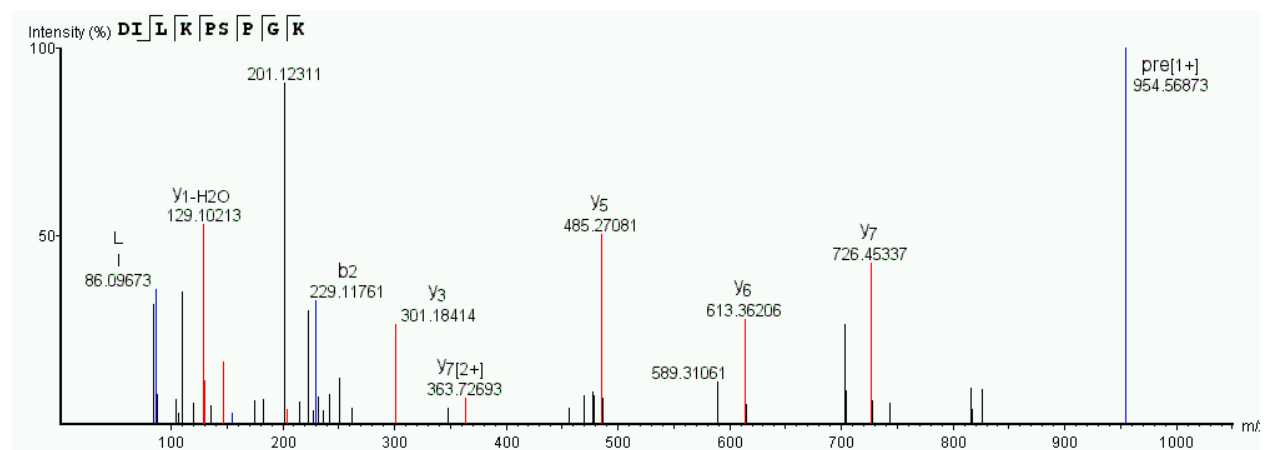

Identified protein:

|A0A087WY96|SLC6A6\_HUMAN Sodium- and chloride-dependent taurine transporter

**126. MS/MS at  $m/z$  663.8171 (2+, RT=42.5453)**

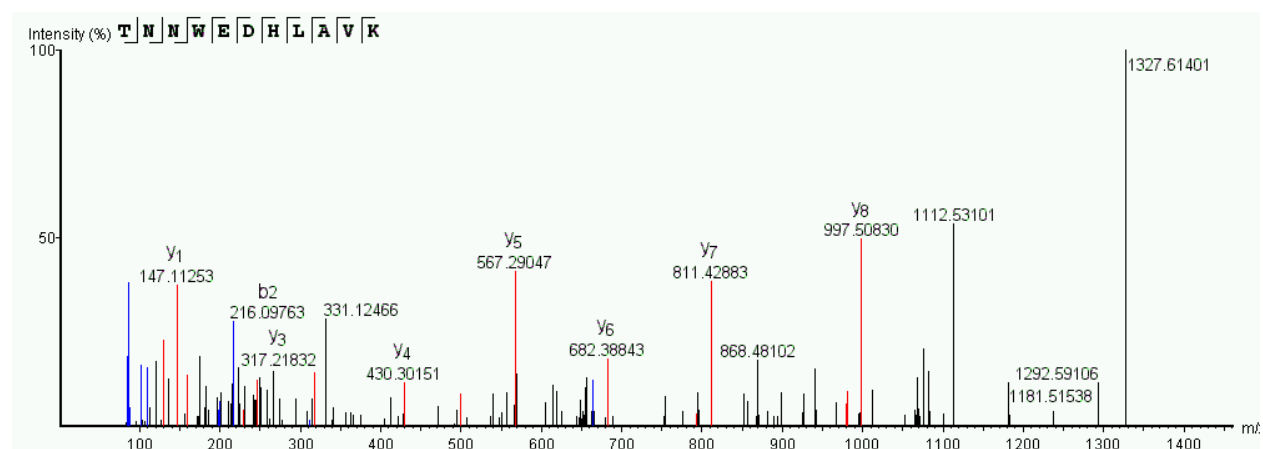

Identified protein:

|Q58FG0|HS905\_HUMAN Putative heat shock protein HSP 90-alpha A5

**127. MS/MS at  $m/z$  917.4543 (1+, RT=34.0985)**

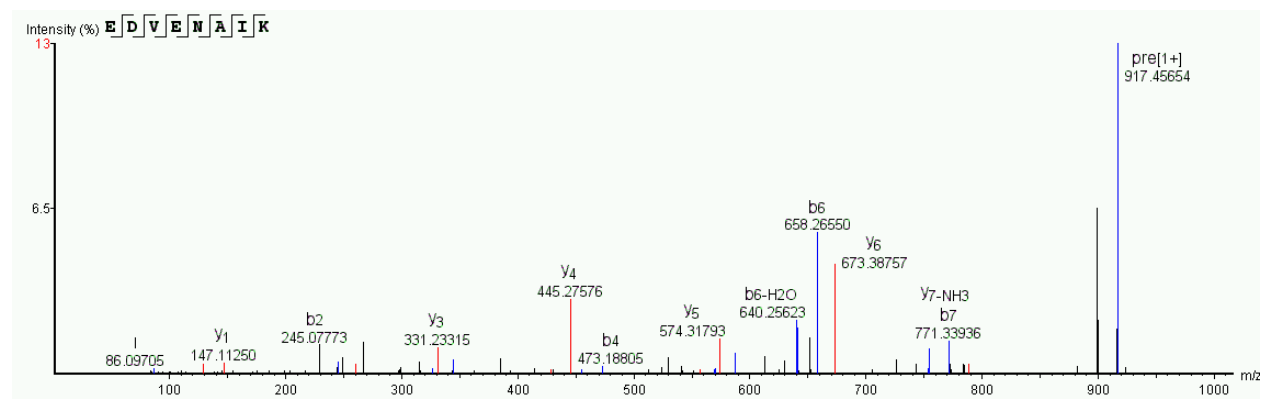

Identified protein:

|Q8NCM8|DYHC2\_HUMAN Cytoplasmic dynein 2 heavy chain 1



128. MS/MS at m/z 359.21036 (2+, RT=28.0345)

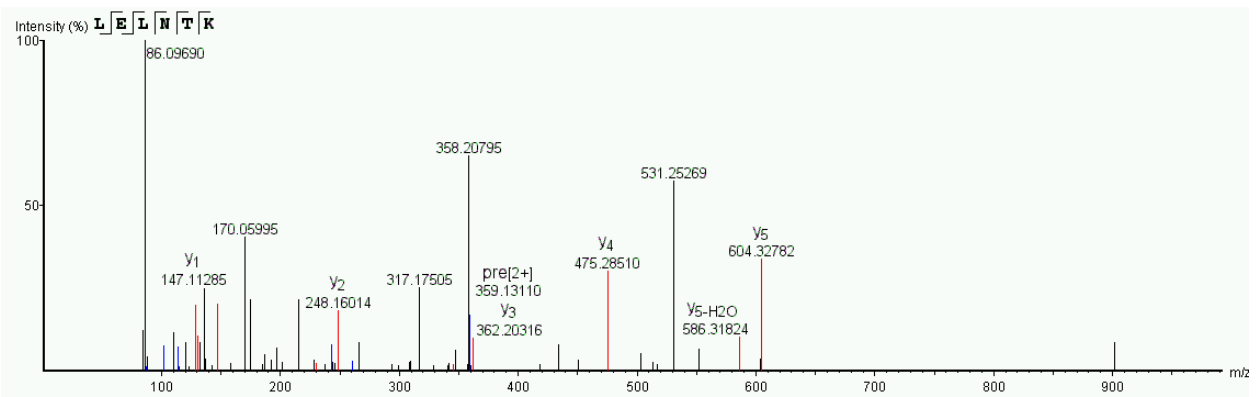

Identified protein:

|Q9H1H9-4|KI13A\_HUMAN Isoform 4 of Kinesin-like protein KIF13A

**129. MS/MS at m/z 566.7747 (2+, RT=25.7783)**

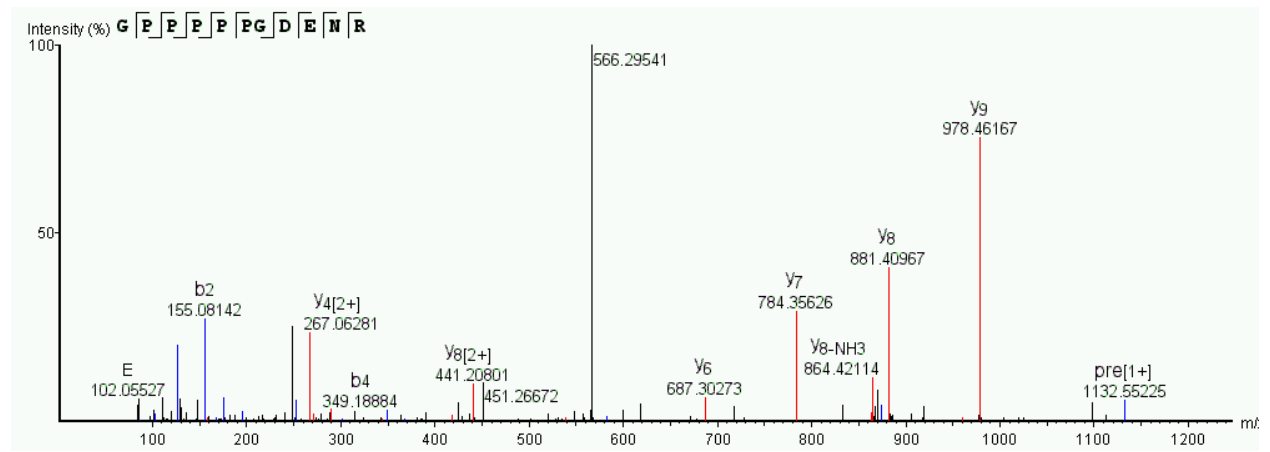

|A0A087WZZ5| SF3B2\_HUMAN Splicing factor 3B subunit 2

**130. MS/MS at  $m/z$  606.2714 (2+, RT=39.2401)**

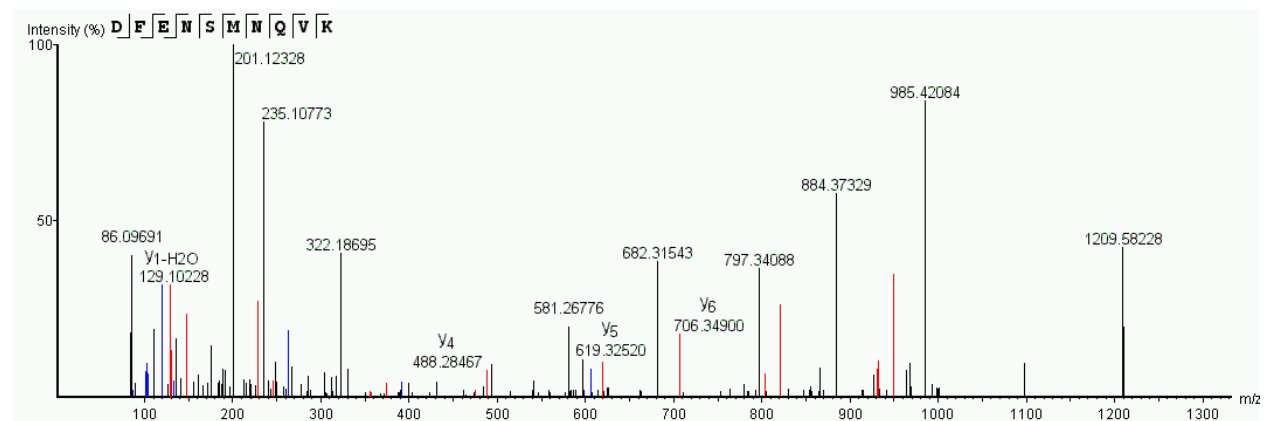

Identified protein:

| O75521-2 | ECI2\_HUMAN Isoform 2 of Enoyl-CoA delta isomerase 2, mitochondrial, Coeluted with ...TSPTS

**131. MS/MS at  $m/z$  448.21167 (2+, RT=26.9957)**

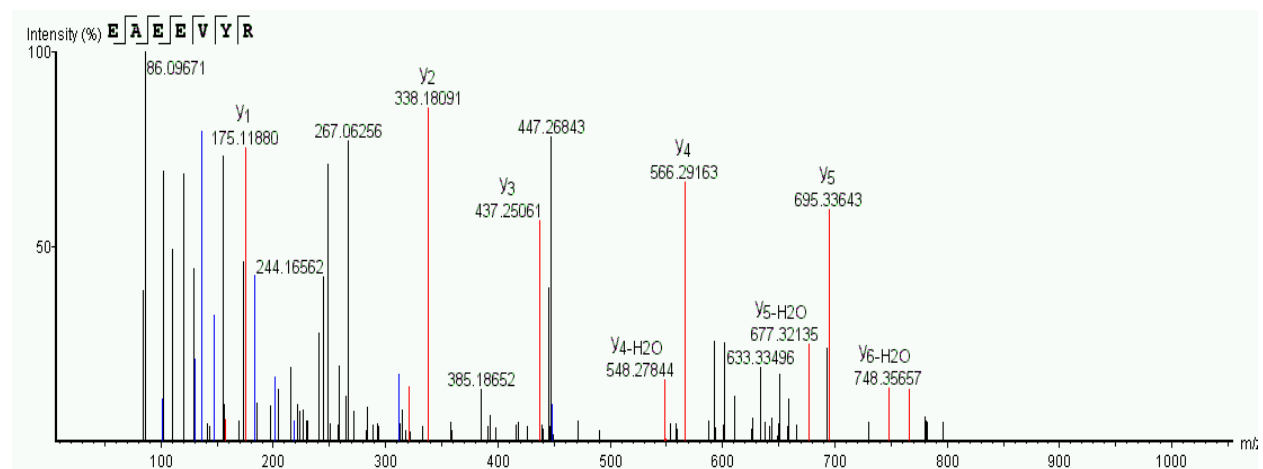

Identified protein:

|Q9Y383-3|LC7L2\_HUMAN Isoform 3 of Putative RNA-binding protein Luc7-like 2

**132. MS/MS at  $m/z$  462.22717 (2+, RT=30.9703)**

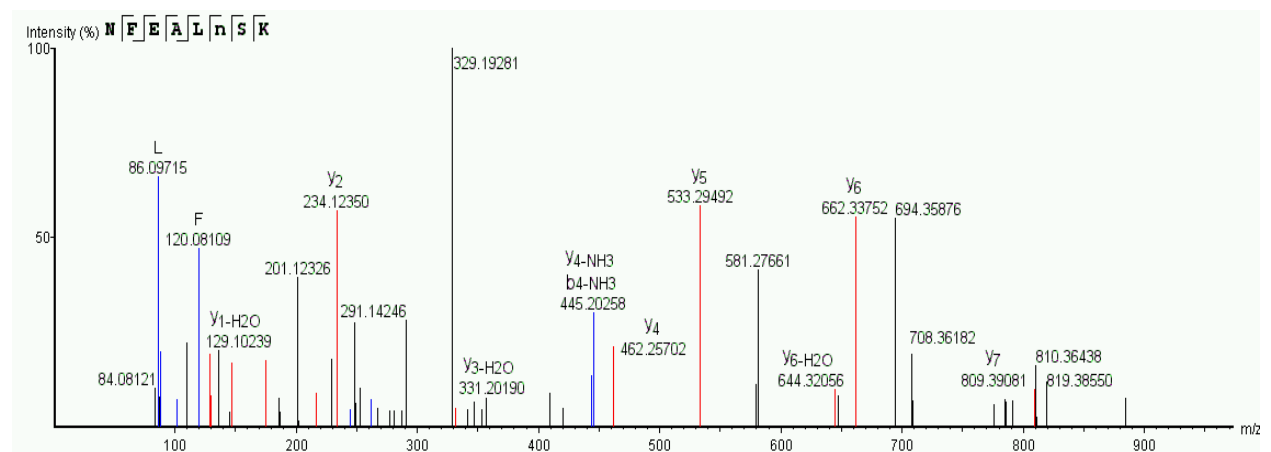

Identified protein:

|K7EMY3|K7EMY3\_HUMAN Chromodomain-helicase-DNA-binding protein 5 (Fragment)

**133. MS/MS at  $m/z$  529.2849 (2+, RT=31.5796)**

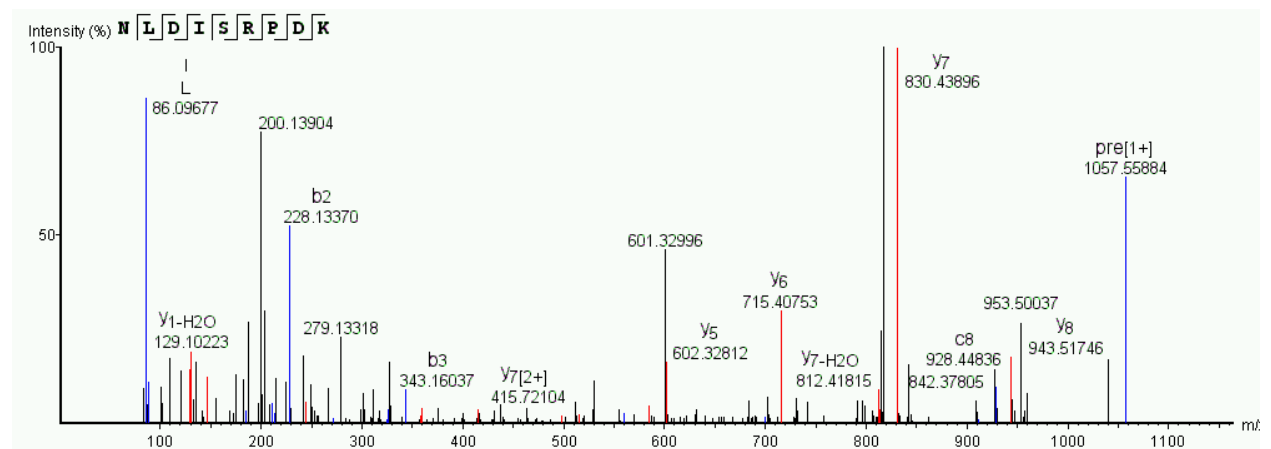

Identified protein:

|P46977|STT3A\_HUMAN Dolichyl-diphosphooligosaccharide--protein glycosyltransferase subunit STT3A

**134. MS/MS at  $m/z$  630.68335 (3+, RT=77.0922)**

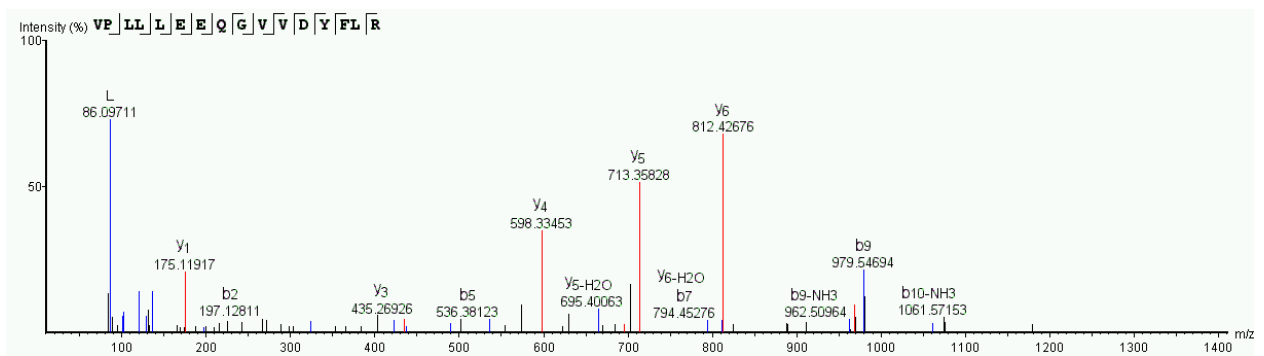

Identified protein:

|P17812|PYRG1\_HUMAN CTP synthase 1 OS=Homo sapiens GN=CTPS1 PE=1 SV=2

**135. MS/MS at  $m/z$  641.8717 (2+, RT=65.3544)**

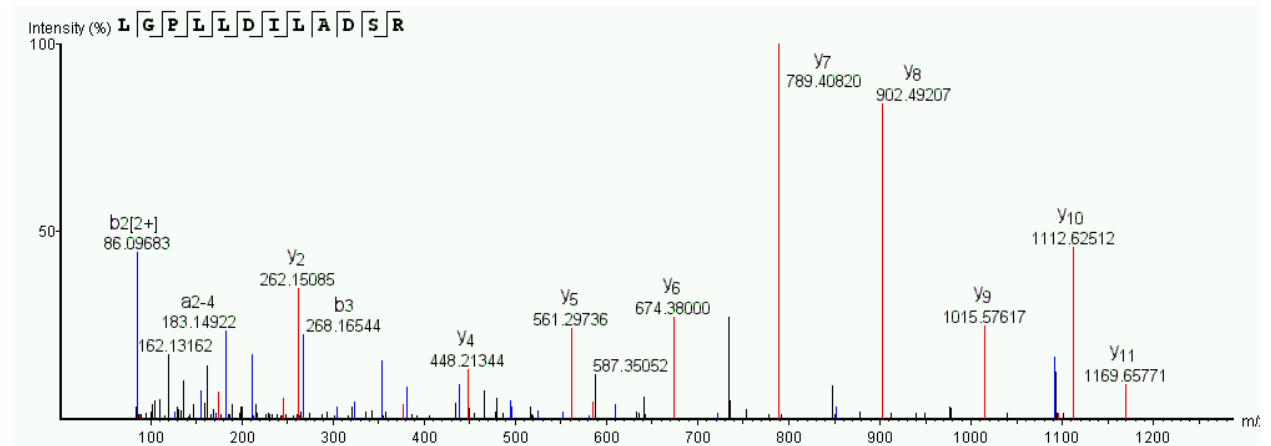

Identified protein

|Q13724-2|MOGS\_HUMAN Isoform 2 of Mannosyl-oligosaccharide glucosidase



**136. MS/MS at  $m/z$  404.2234 (2+, RT=34.2401)**

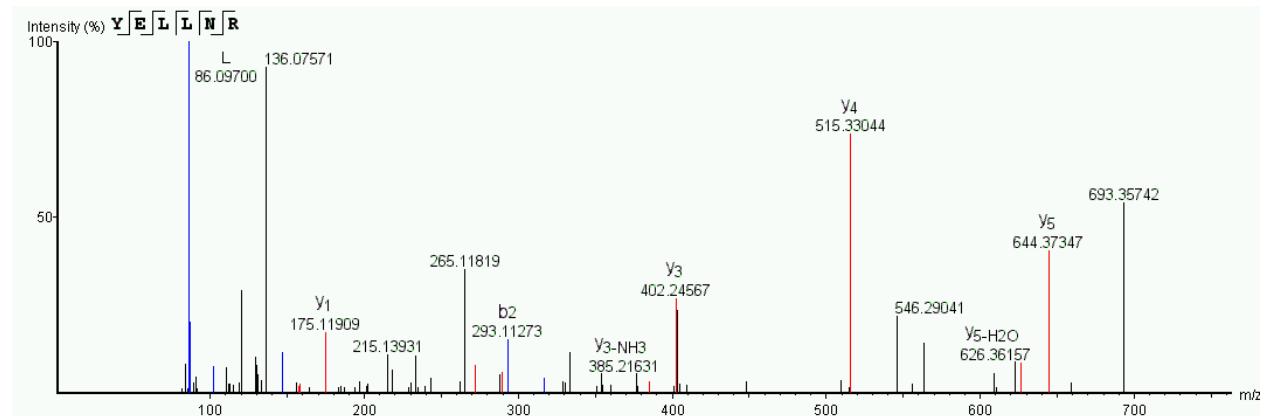

Identified protein:

|Q8NDI1|EHBP1\_HUMAN EH domain-binding protein 1

**137. MS/MS at  $m/z$  547.77576 (2+, RT=43.3279)**

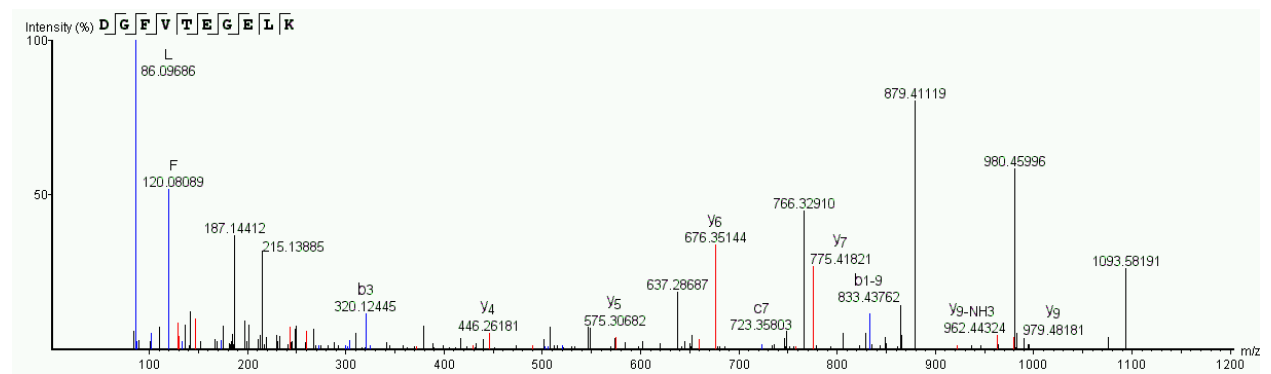

Identified protein:

|O43852-4|CALU\_HUMAN Isoform 4 of Calumenin

**138. MS/MS at  $m/z$  419.22928 (2+, RT=43.3127)**

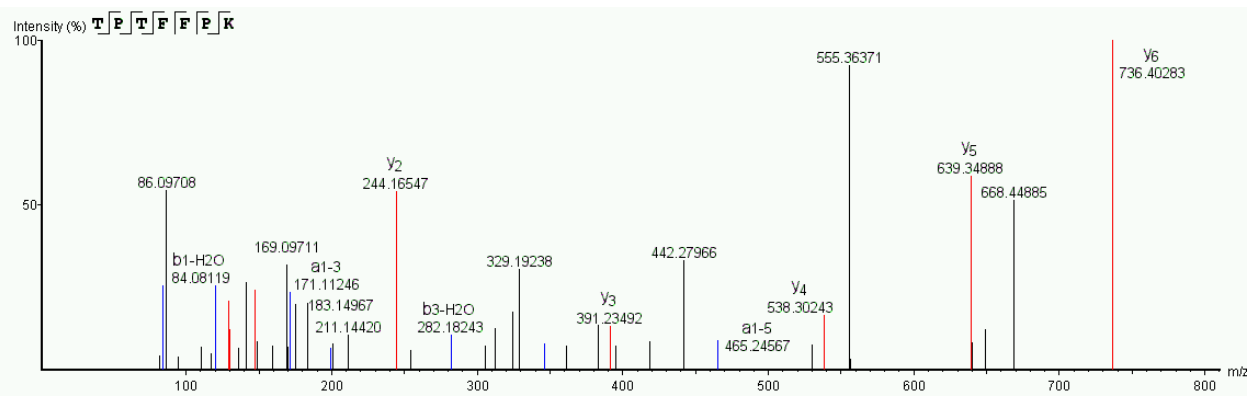

Identified protein:

|P10253|LYAG\_HUMAN Lysosomal alpha-glucosidase OS=Homo sapiens GN=GAA PE=1 SV=4

139. MS/MS at  $m/z$  722.4059 (1+, RT=36.2319)

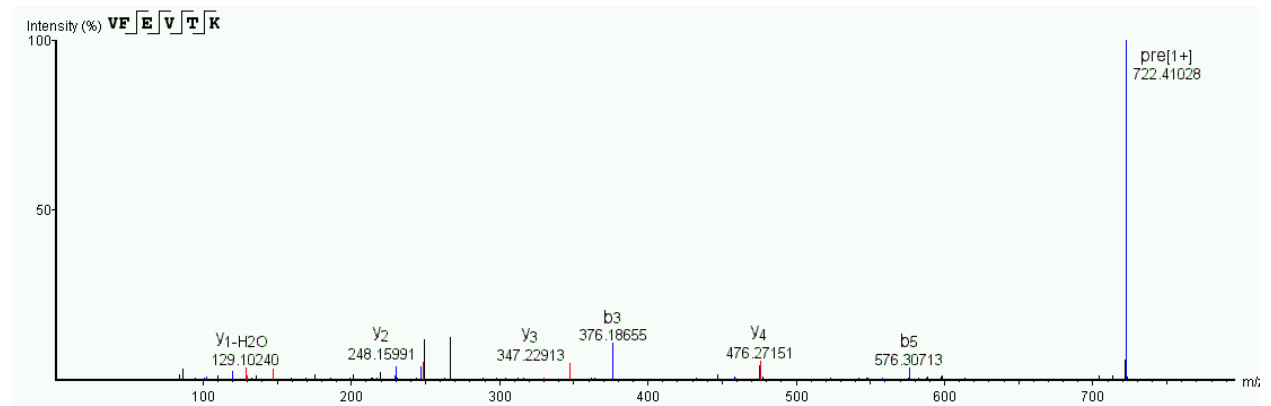

Identified protein:

|H7BZ41|H7BZ41\_HUMAN Lipoygenase homology domain-containing protein 1

**140. MS/MS at  $m/z$  549.2452 (2+, RT=31.4659)**

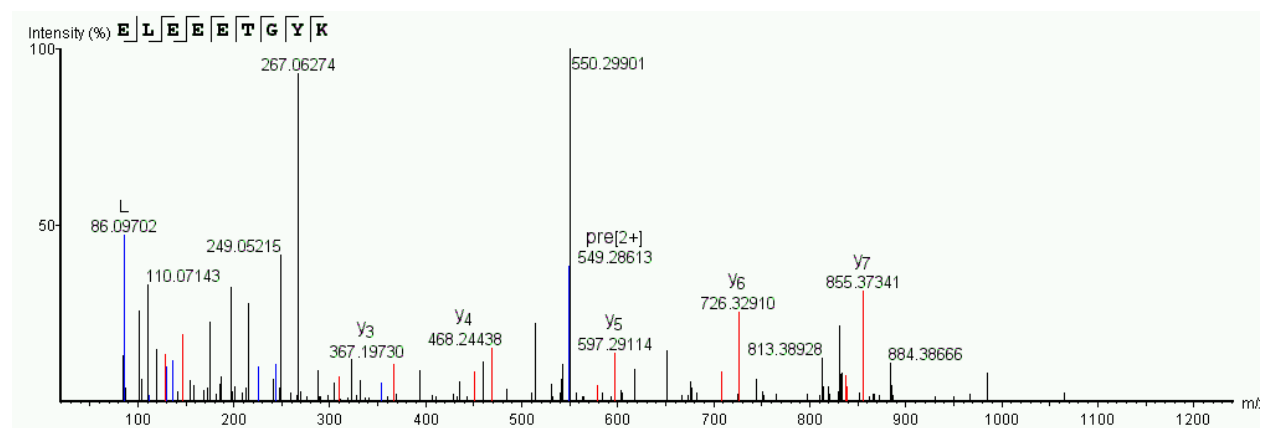

Identified protein:

|Q9UKK9|NUDT5\_HUMAN ADP-sugar pyrophosphatase, Coeluted with ...TAH...

**141. MS/MS at  $m/z$  493.24493 (2+, RT=24.0456)**

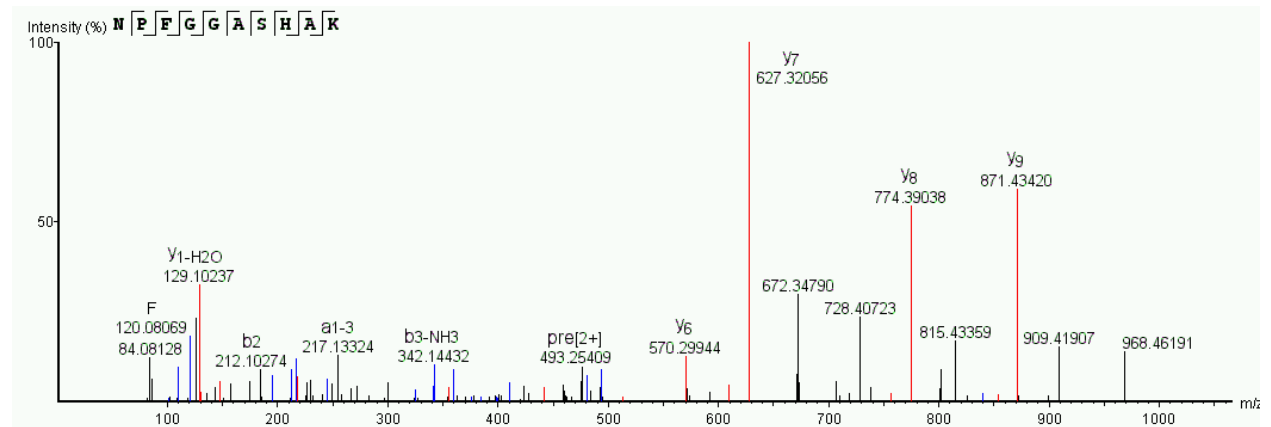

Identified protein:

|D6RD47|D6RD47\_HUMAN 40S ribosomal protein S23

**142. MS/MS at  $m/z$  906.4226 (2+, RT=39.5284)**

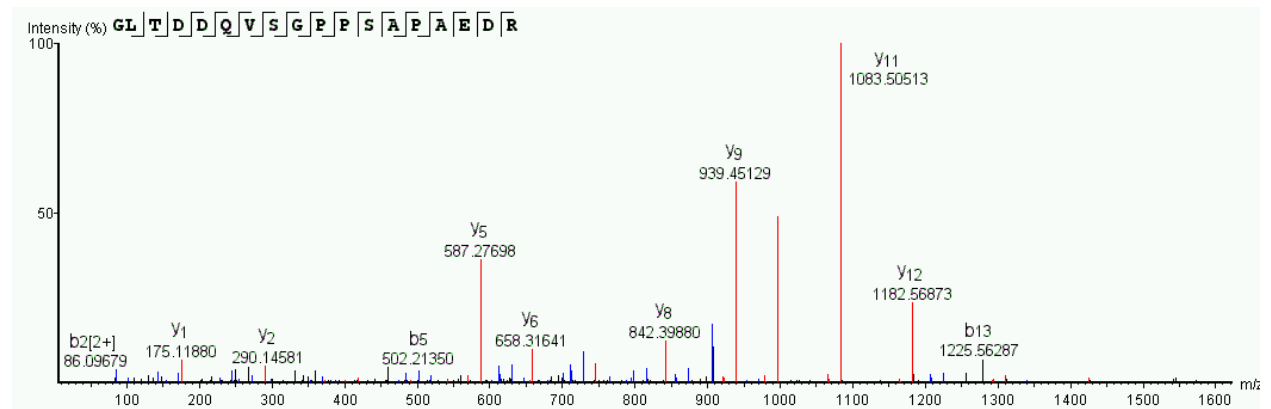

Identified protein:

|Q05BK6|Q05BK6\_HUMAN Protein TFG

**143. MS/MS at  $m/z$  626.8198 (2+, RT=39.2341)**

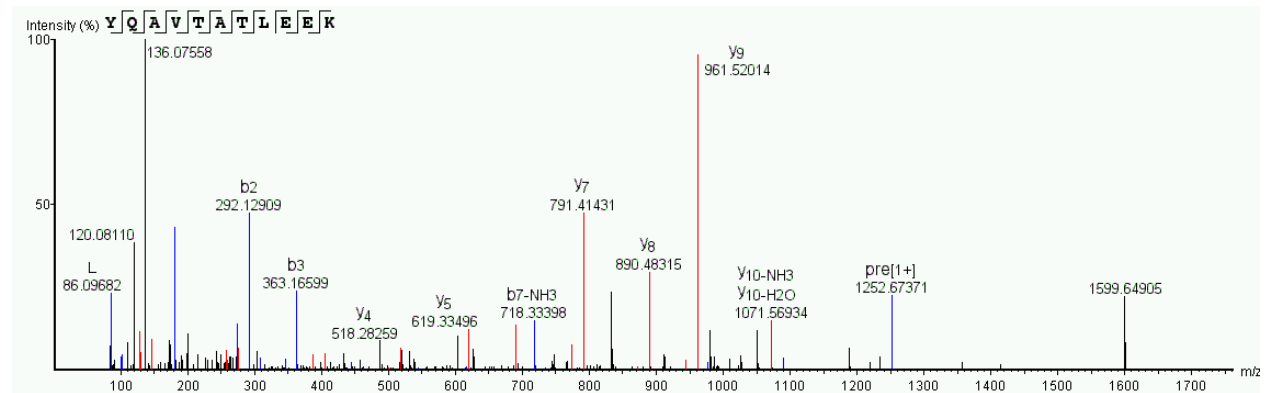

Identified protein:

|P40429|RL13A\_HUMAN 60S ribosomal protein L13a



**144. MS/MS at  $m/z$  450.2126 (2+, RT=19.582)**

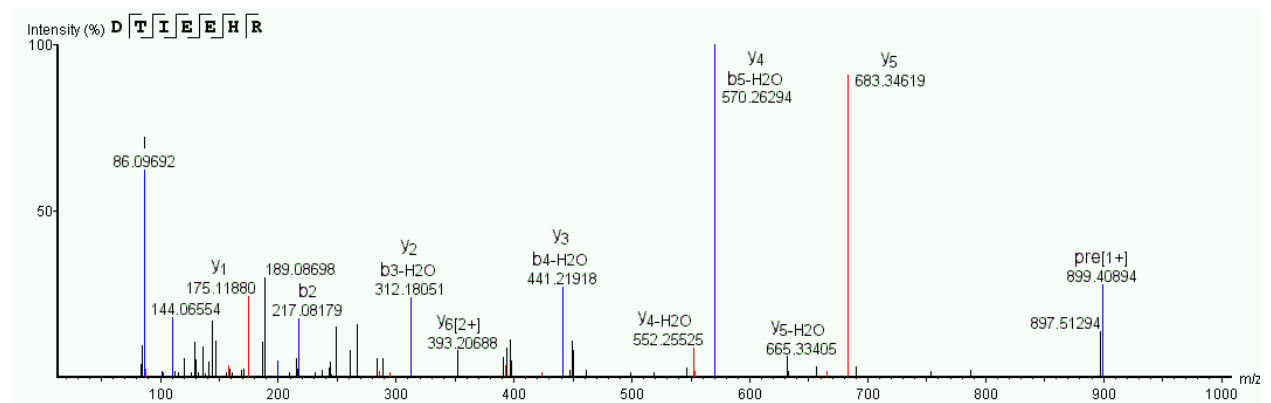

Identified protein:

|P23381|SYWC\_HUMAN Tryptophan--tRNA ligase, cytoplasmic

**145. MS/MS at  $m/z$  396.24738 (2+, RT=26.8922)**

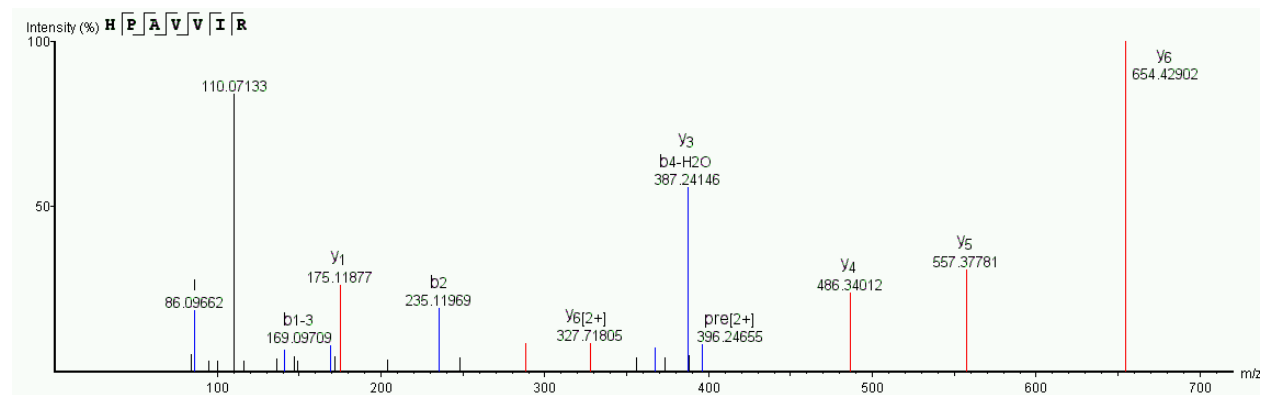

Identified protein:

|P62829|RL23\_HUMAN 60S ribosomal protein L23

146. MS/MS at  $m/z$  690.4166 (2+, RT=69.4451)

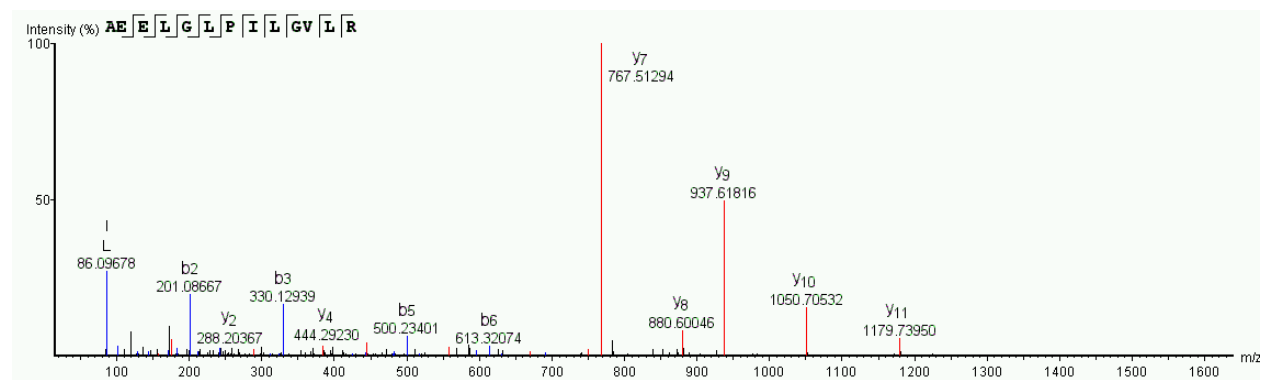

|C9JDE9|ACAA1\_HUMAN 3-ketoacyl-CoA thiolase, peroxisomal

147. MS/MS at  $m/z$  639.2889 (2+, RT=20.7064)

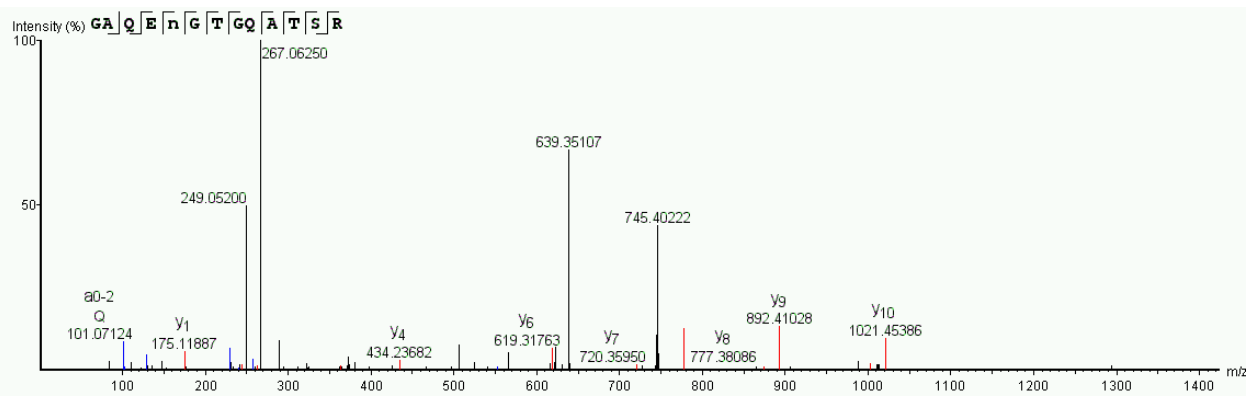

|Q5JTA5|CD34\_HUMAN Hematopoietic progenitor cell antigen CD34

**148. MS/MS at  $m/z$  751.41785 (3+, RT=76.0783)**

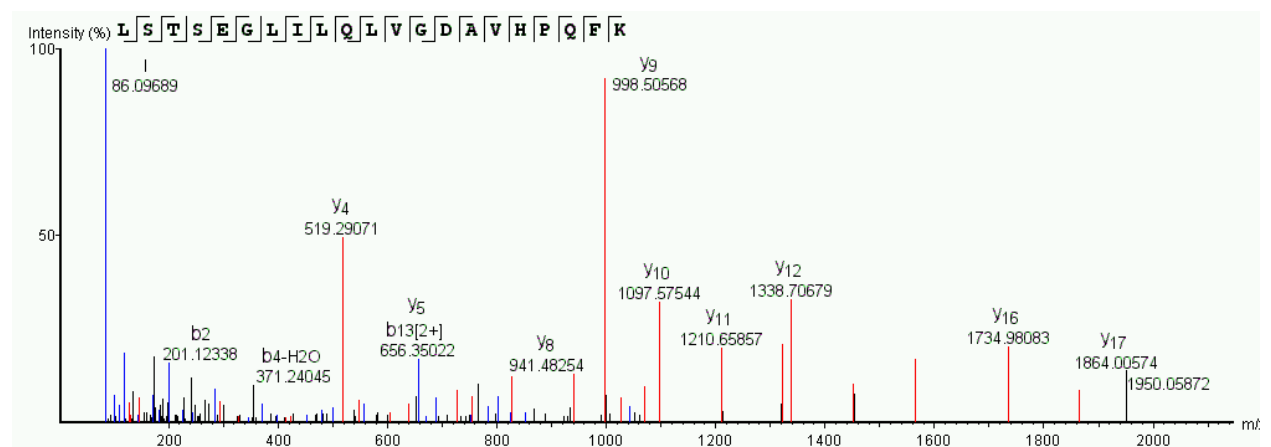

Identified protein:

|K7EKW4|ISOC2\_HUMAN Isochorismatase domain-containing protein 2, mitochondrial (Fragment)

**149. MS/MS at m/z 459.2442 (2+, RT=33.3413)**

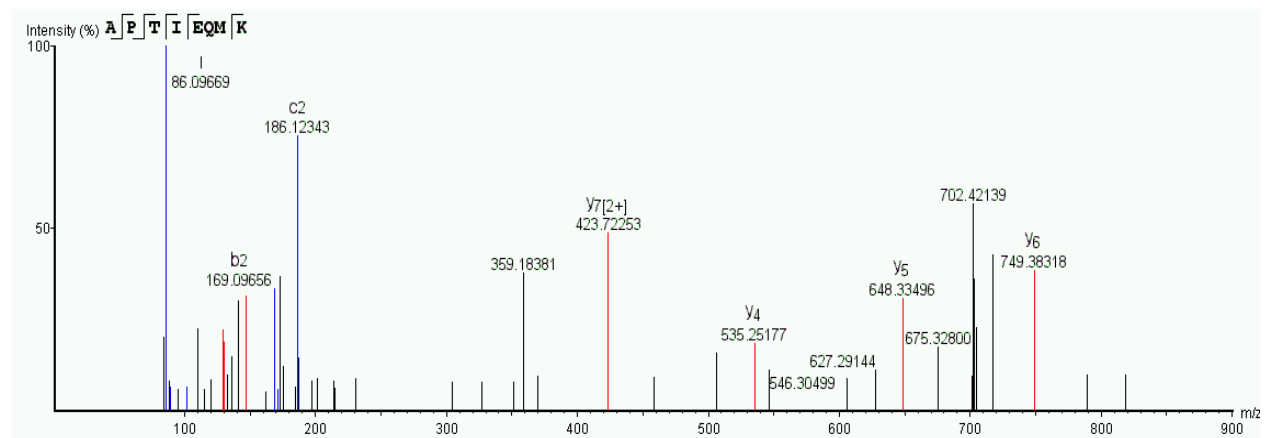

Identified protein

|P28482-2|MK01\_HUMAN Isoform 2 of Mitogen-activated protein kinase 1

150. MS/MS at  $m/z$  681.3111 (2+, RT=25.0422)

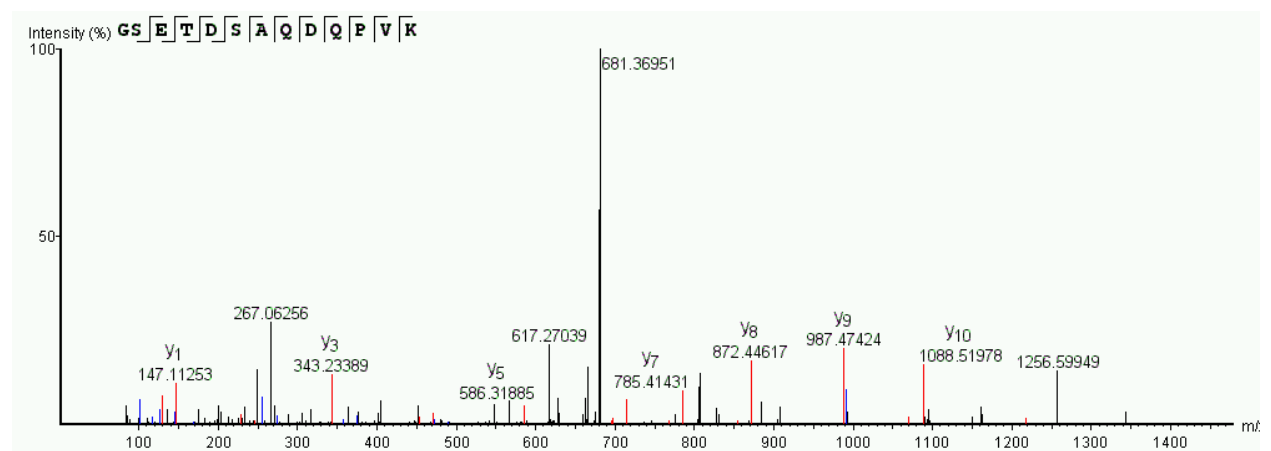

Identified protein:

|P30419|NMT1\_HUMAN Glycylpeptide N-tetradecanoyltransferase 1

**151. MS/MS at  $m/z$  482.72775 (2+, RT=25.9349)**

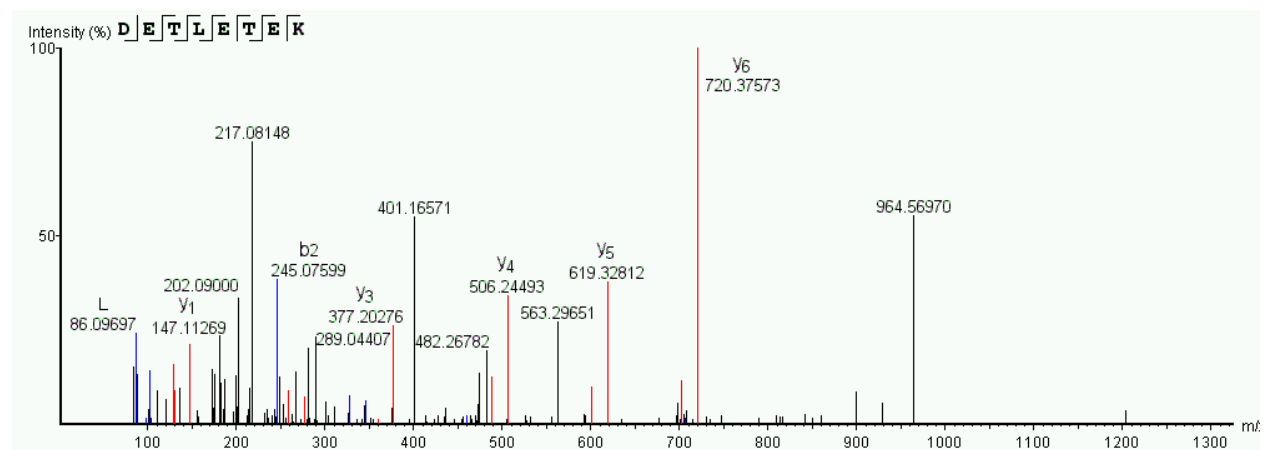

Identified protein:

|P61163|ACTZ\_HUMAN Alpha-centractin



**152. MS/MS at  $m/z$  818.4074 (3+, RT=80.6454)**

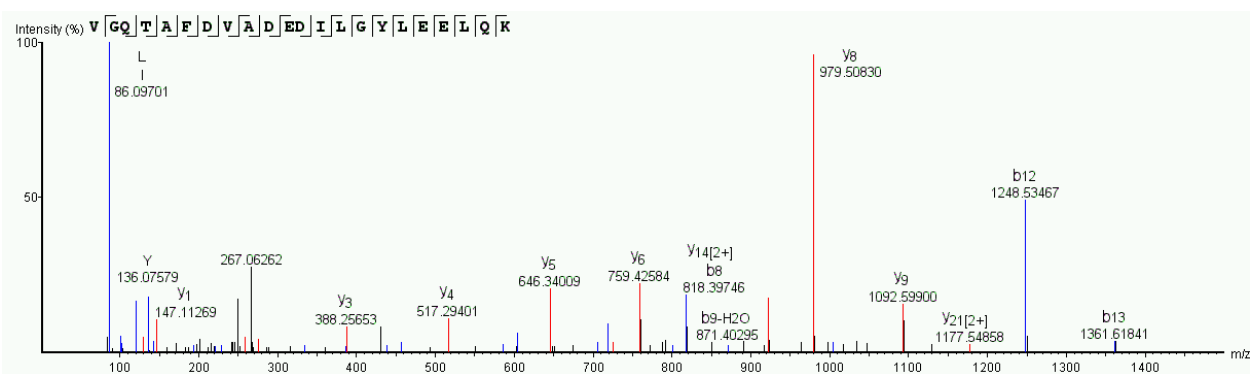

Identified protein:

|O14974-5|MYPT1\_HUMAN Isoform 5 of Protein phosphatase 1 regulatory subunit 12A

**153. MS/MS at  $m/z$  709.675 (3+, RT=35.3544)**

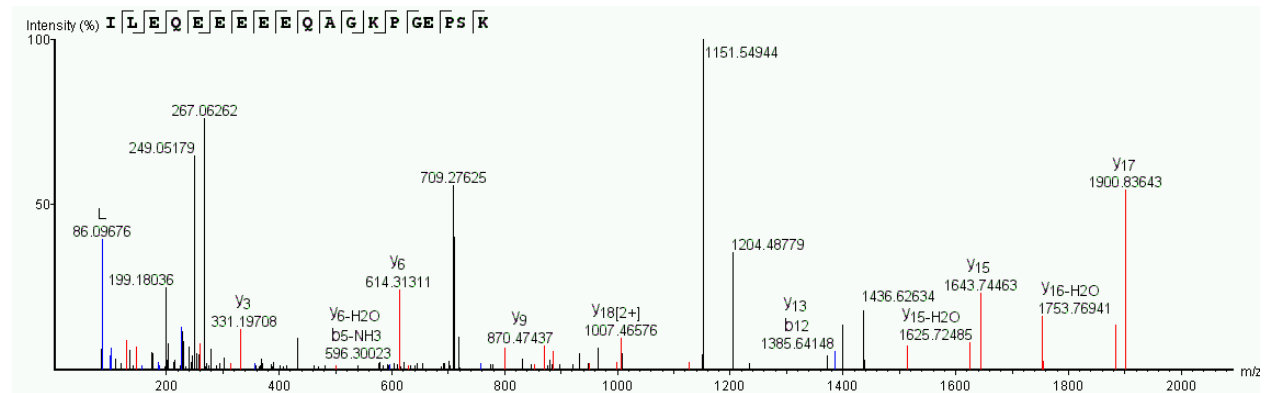

Identified protein:

|Q9BXP5-4|SRRT\_HUMAN Isoform 4 of Serrate RNA effector molecule homolog

154. MS/MS at  $m/z$  785.88654 (2+, RT=61.0888)

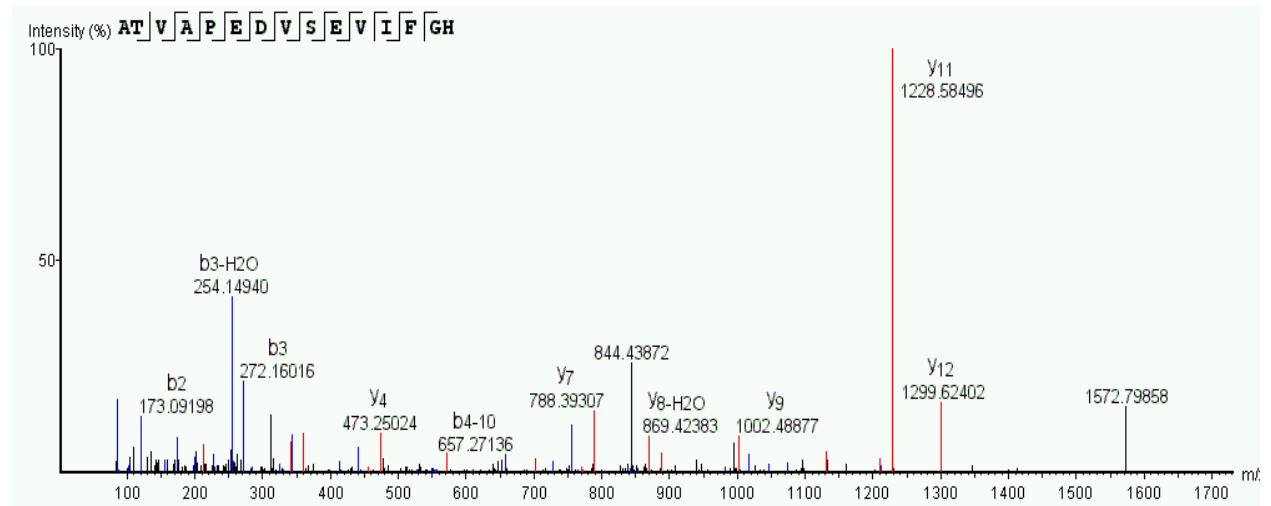

Identified protein

|Q9BWD1|ACAT2\_HUMAN Acetyl-CoA acetyltransferase, cytosolic

**155. MS/MS at  $m/z$  722.7109 (3+, RT=65.9306)**

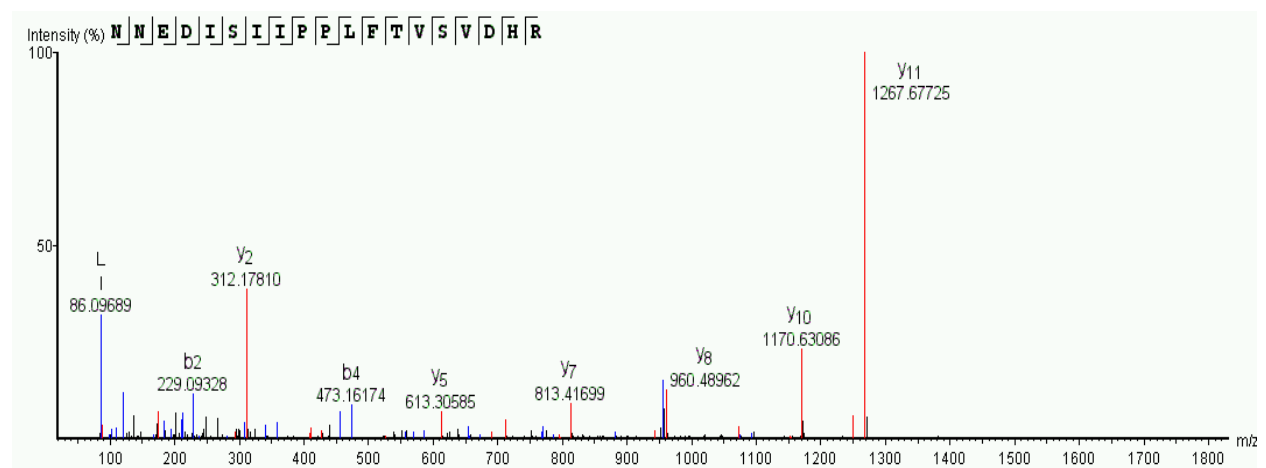

Identified protein:

|P51571|SSRD\_HUMAN Translocon-associated protein subunit delta

**156. MS/MS at  $m/z$  440.89044 (3+, RT=39.2912)**

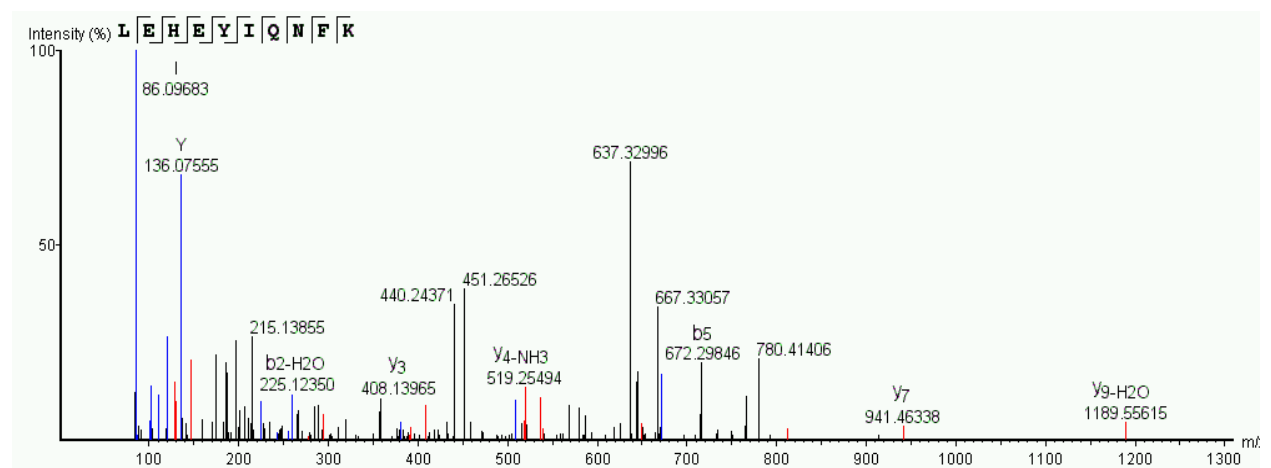

Identified protein:

|Q15691|MARE1\_HUMAN Microtubule-associated protein RP/EB family member 1

157. MS/MS at  $m/z$  929.4906 (3+, RT=87.5262)

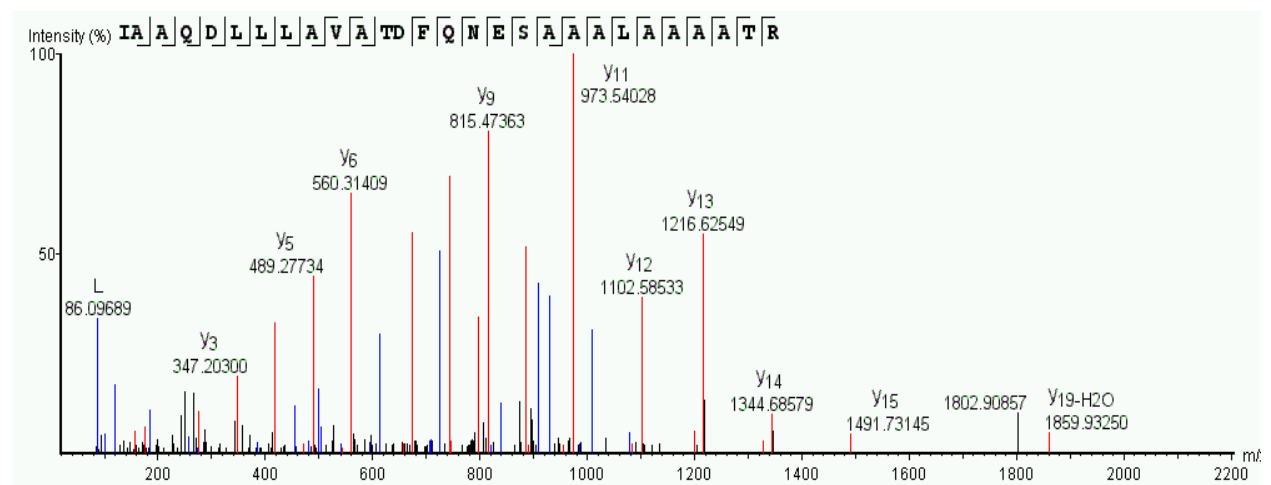

Identified protein:

|Q96P70|IPO9\_HUMAN Importin-9

158. MS/MS at  $m/z$  575.79297 (2+, RT=56.0663)

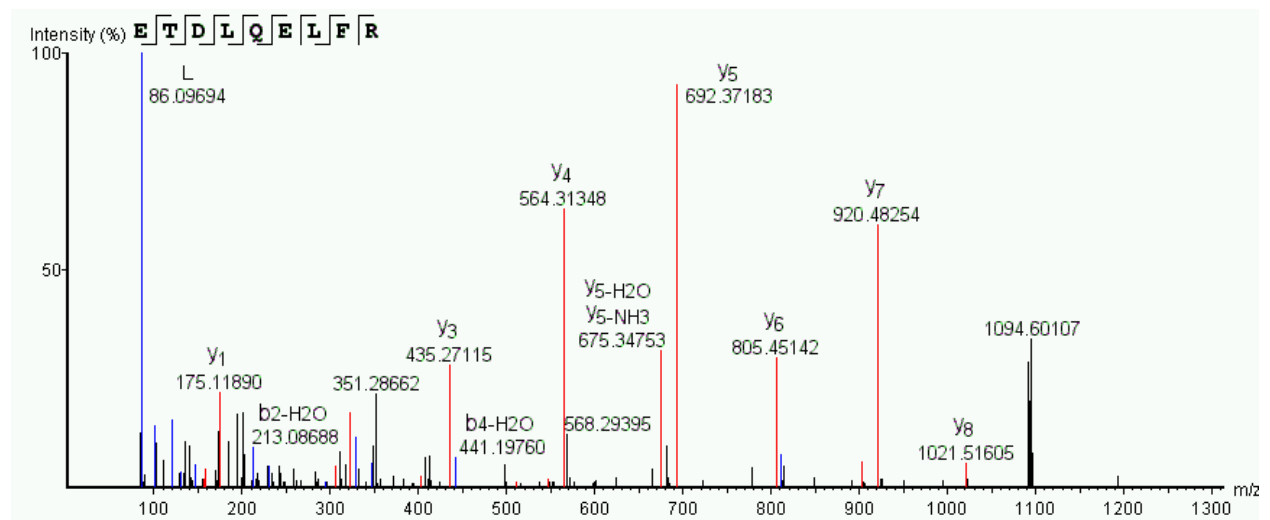

Identified protein:

|K7ER90|K7ER90\_HUMAN Eukaryotic translation initiation factor 3 subunit G (Fragment)

**159. MS/MS at  $m/z$  617.81995 (2+, RT=37.0374)**

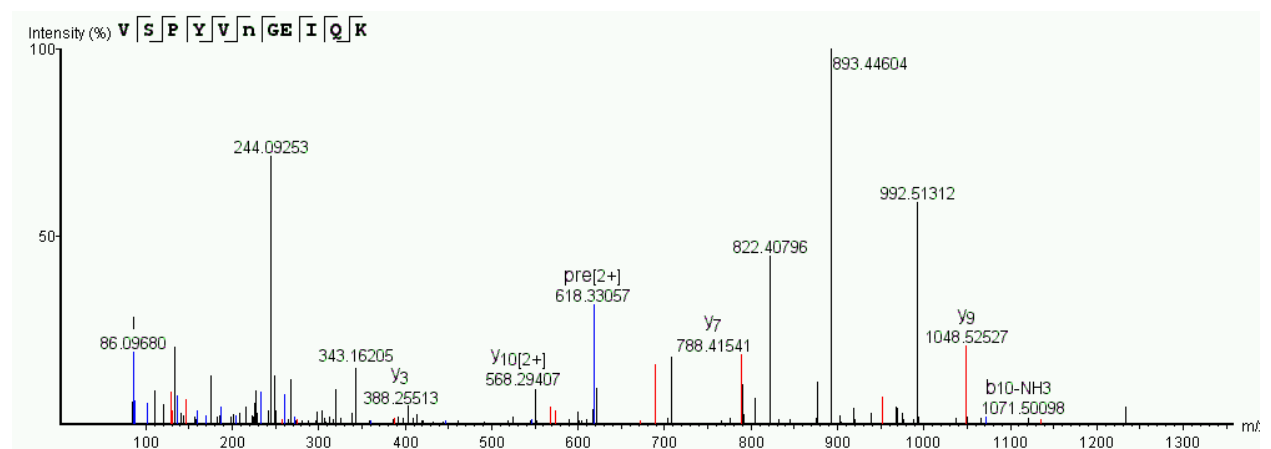

Identified protein:

|P80217|IN35\_HUMAN Interferon-induced 35 kDa protein, Coeluted with ...VANSA...



**160. MS/MS at  $m/z$  610.3462 (2+, RT=57.1853)**

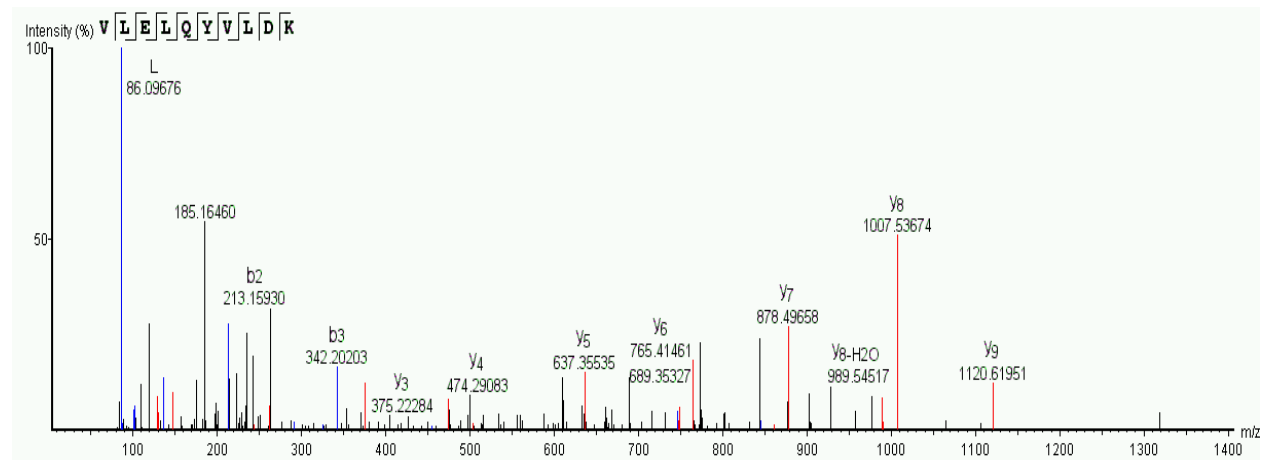

Identified protein:

|G3V153|G3V153\_HUMAN Caprin-1

**161. MS/MS at  $m/z$  604.3223 (2+, RT=37.0089)**

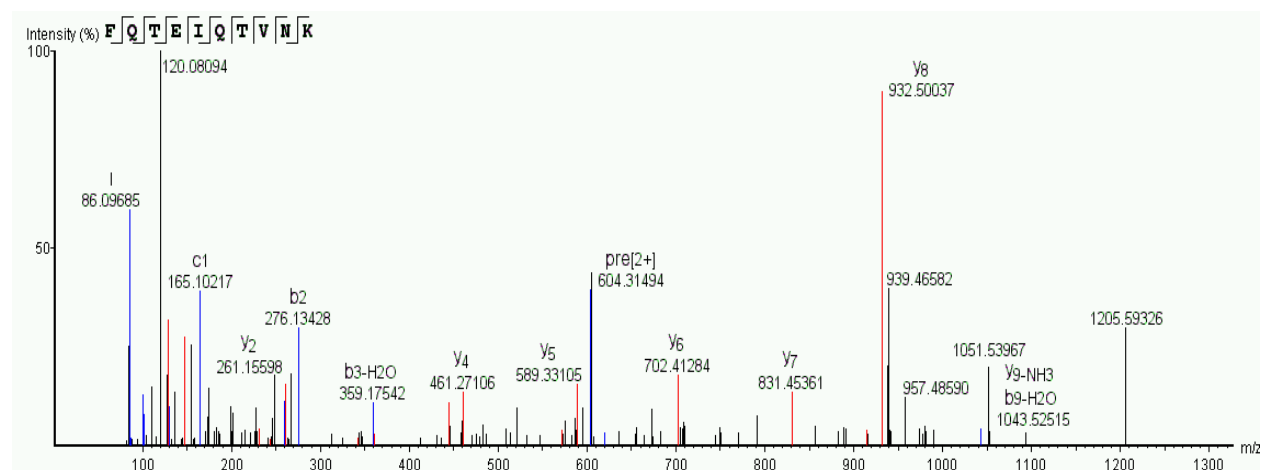

Identified protein:

|P14868-2|SYDC\_HUMAN Isoform 2 of Aspartate--tRNA ligase, cytoplasmic

**162. MS/MS at  $m/z$  823.45874 (3+, RT=57.6043)**

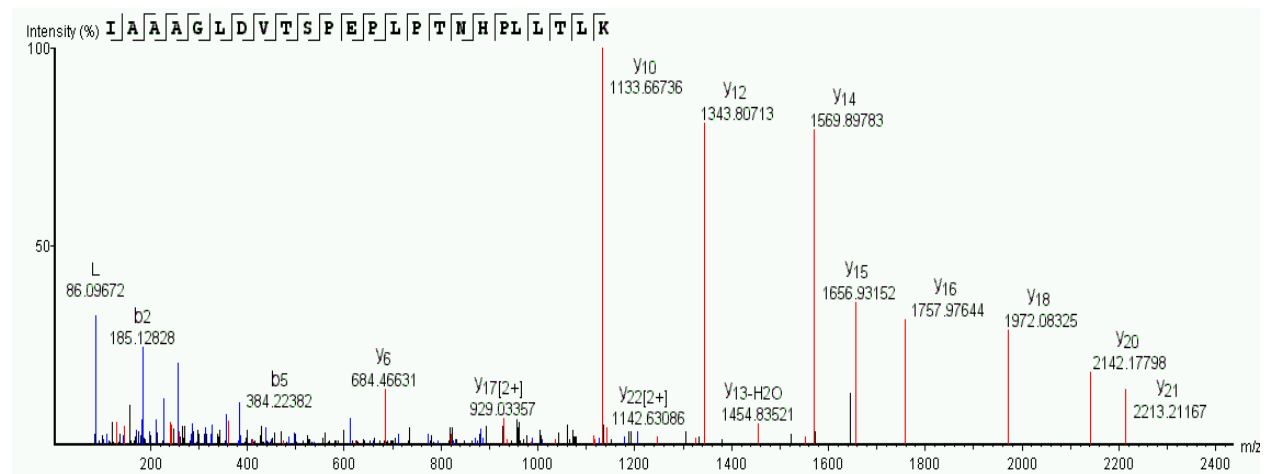

Identified protein:

|Q9UBQ7|GRHPR\_HUMAN Glyoxylate reductase/hydroxypyruvate reductase

**163. MS/MS at  $m/z$  480.73245 (2+, RT=18.8177)**

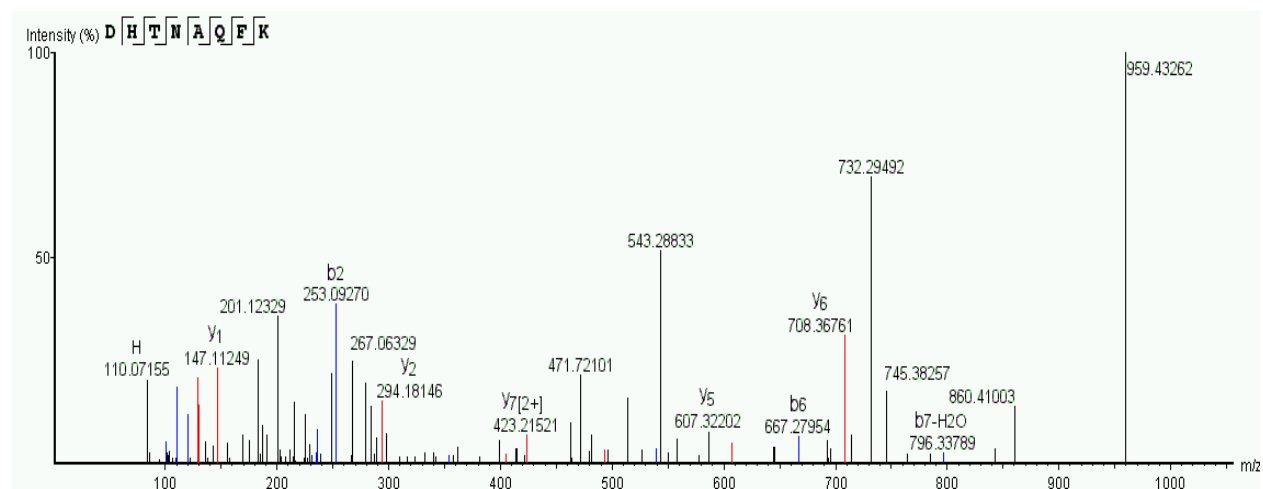

Identified protein:

|O75489|NDUS3\_HUMAN NADH dehydrogenase [ubiquinone] iron-sulfur protein 3, mitochondrial

**164. MS/MS at  $m/z$  564.80133 (2+, RT=45.0195)**

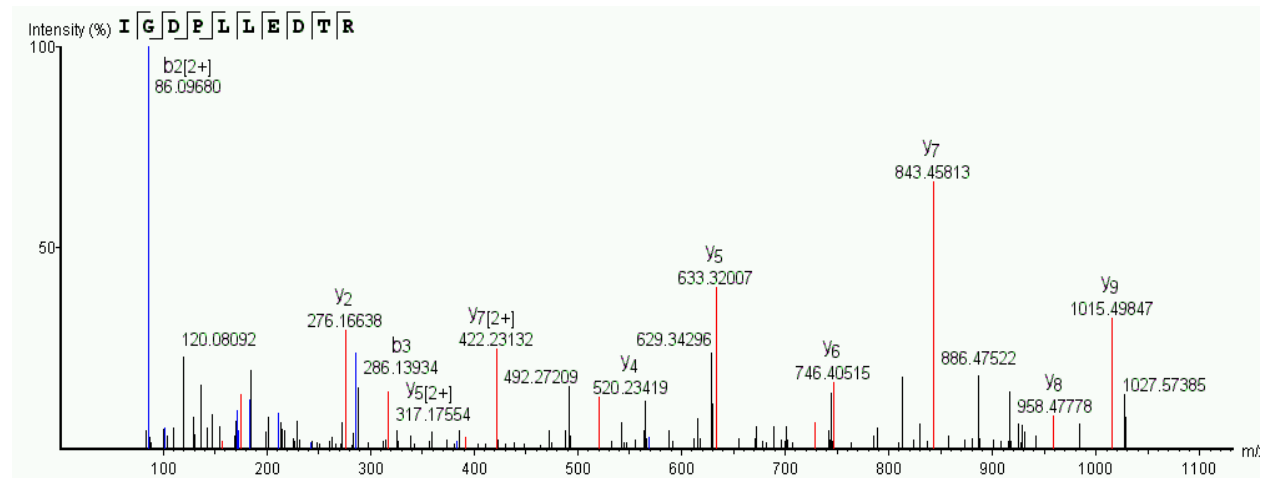

Identified protein:

|P49189|AL9A1\_HUMAN 4-trimethylaminobutylaldehyde

**165. MS/MS at  $m/z$  811.91925 (2+, RT=67.5059)**

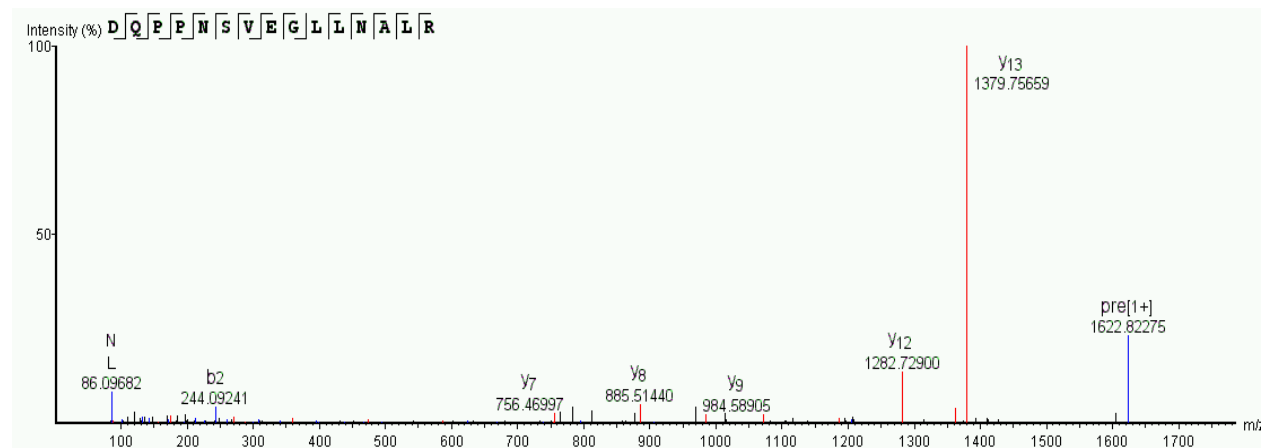

Identified protein:

|Q9NUQ9|FA49B\_HUMAN Protein FAM49B

**166. MS/MS at  $m/z$  765.8766 (RT=45.8876)**

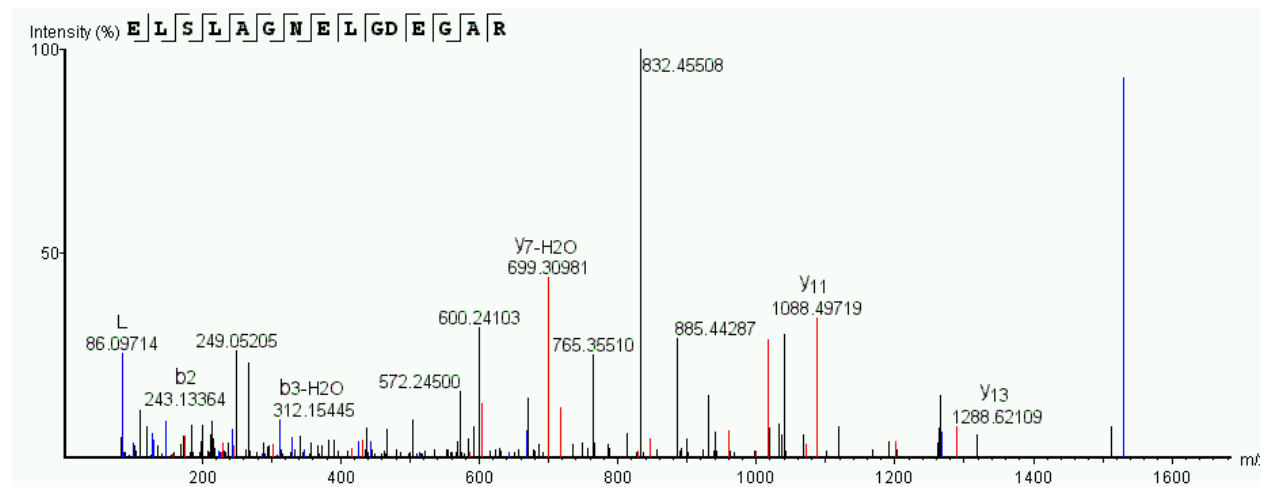

Identified protein:

[P13489] RINI\_HUMAN Ribonuclease inhibitor

**167. MS/MS at m/z 772.90607 (2+, RT=79.7065)**

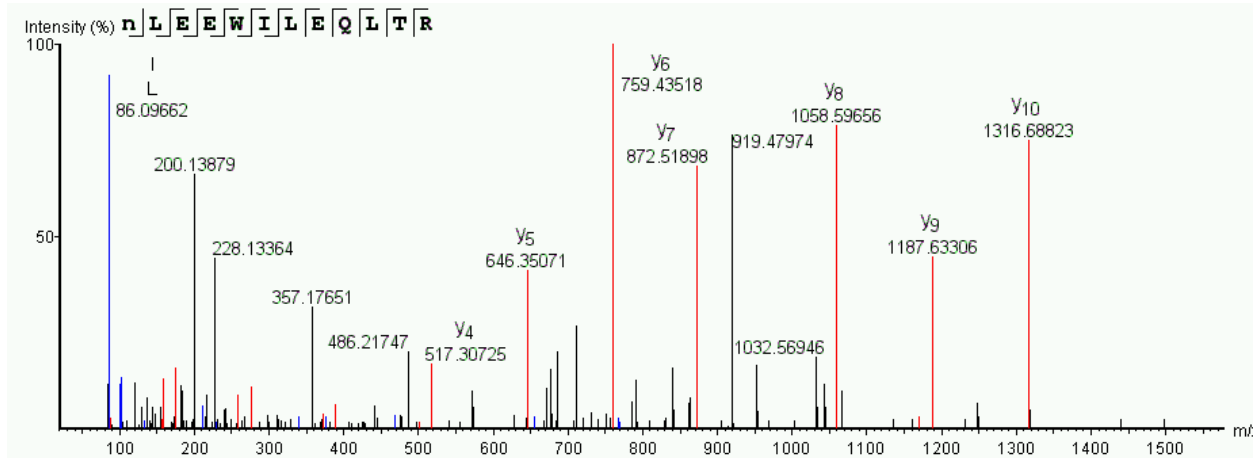

Identified protein:

|B5MC51|LIMK2\_HUMAN LIM domain kinase 2



168. MS/MS at m/z 559.2753 (2+, RT=30.0212)

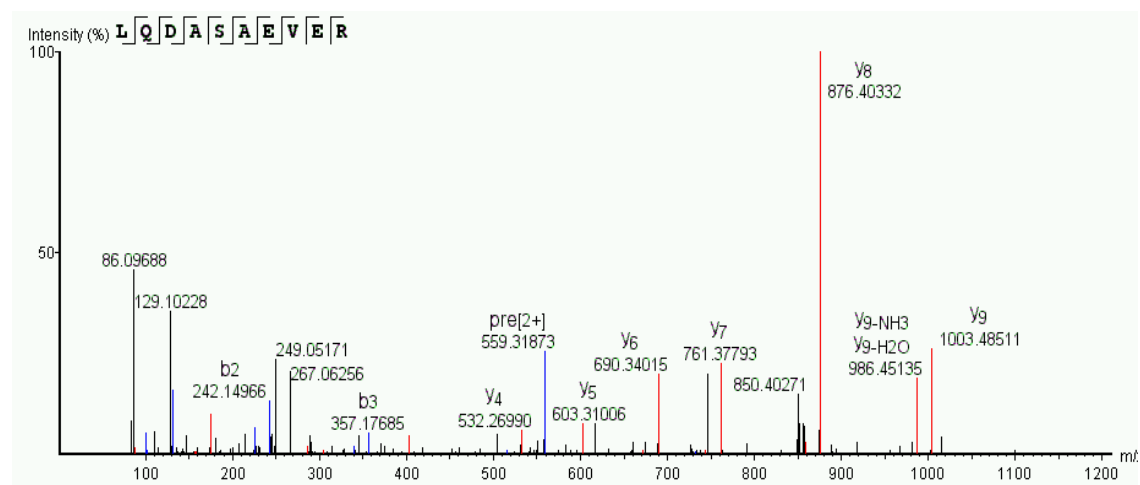

Identified protein:

|Q10589-2|BST2\_HUMAN Isoform 2 of Bone marrow stromal antigen 2

169. MS/MS at m/z 795.4314 (2+, RT=71.4976)

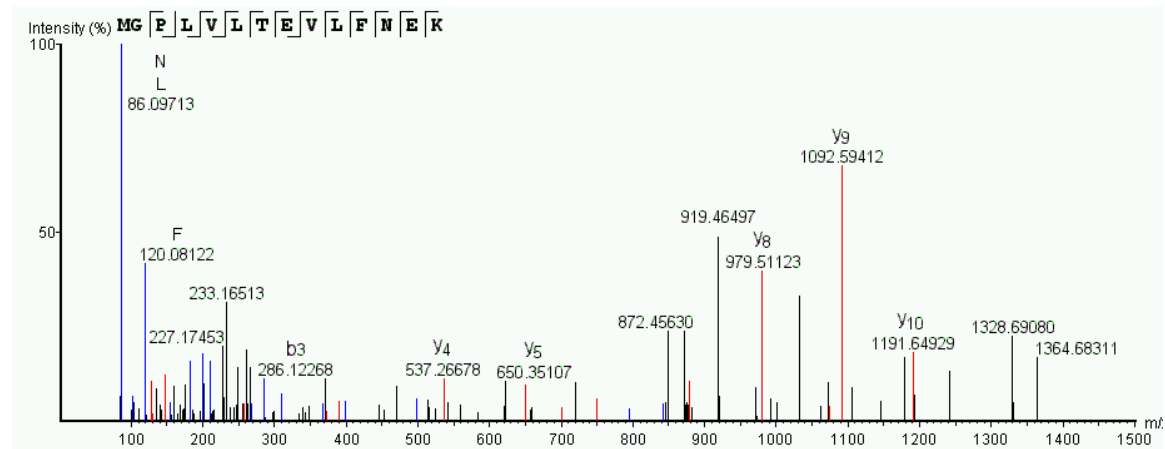

Identified protein:

|P55010|IF5\_HUMAN Eukaryotic translation initiation factor 5

170. MS/MS at  $m/z$  707.8507 (2+, RT=25.1612)

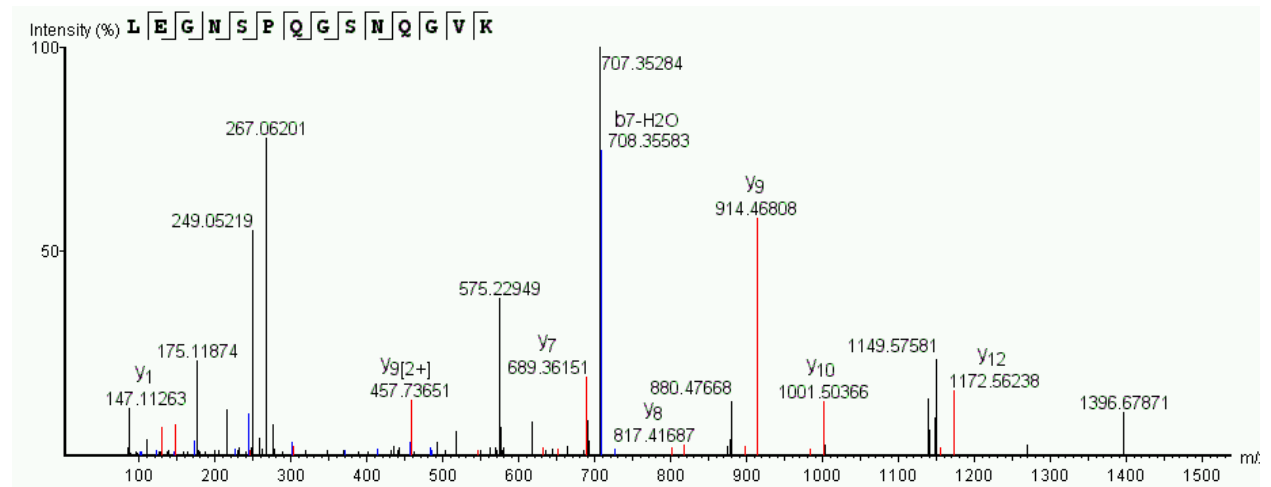

Identified protein:

|P61006|RAB8A\_HUMAN Ras-related protein Rab-8A

171. MS/MS at m/z 518.2573 (2+, RT=19.9096)

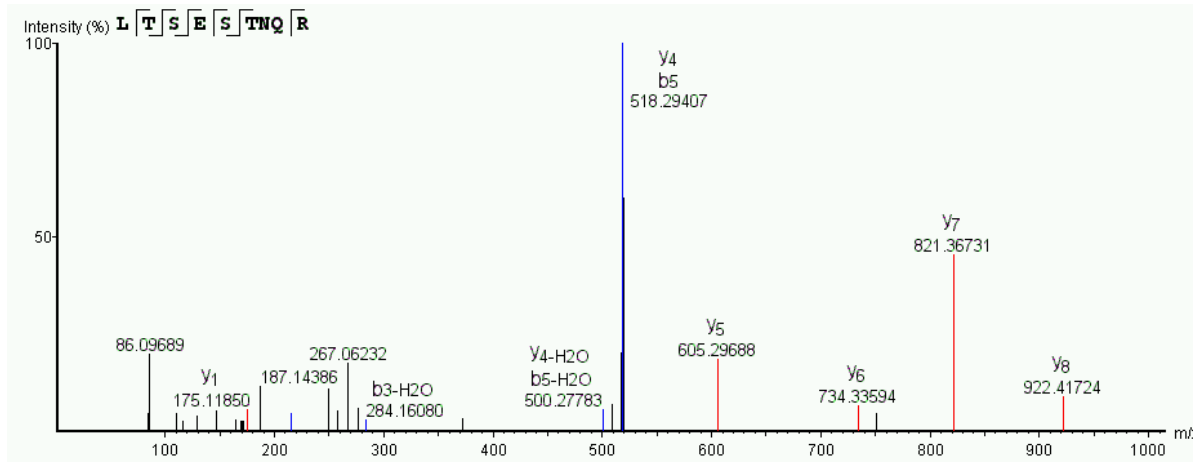

Identified protein

|Q7Z7H5|TMED4\_HUMAN Transmembrane emp24 domain-containing protein 4

**172. MS/MS at  $m/z$  691.8347 (2+, RT=25.1106)**

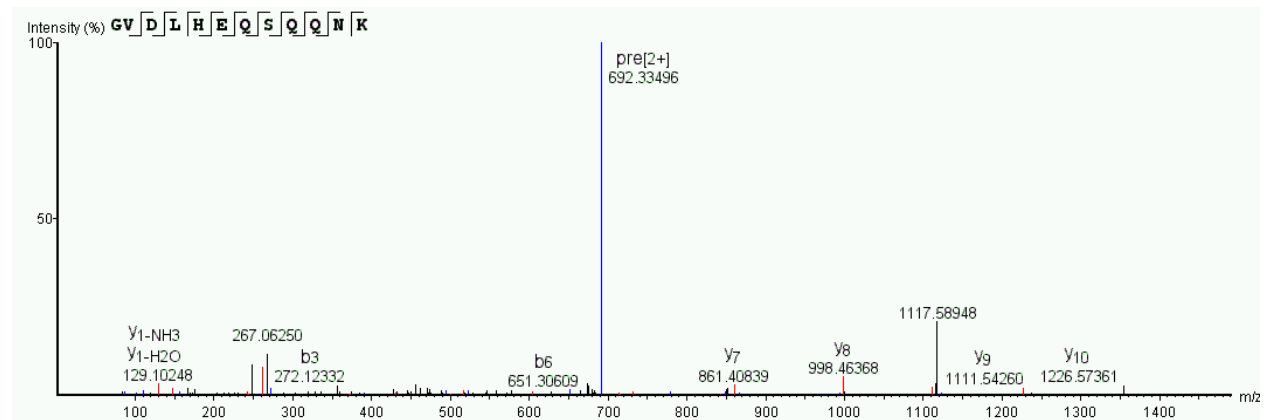

Identified protein:

|P61020|RAB5B\_HUMAN Ras-related protein Rab-5B

**173. MS/MS at  $m/z$  528.7375 (2+, RT=16.8035)**

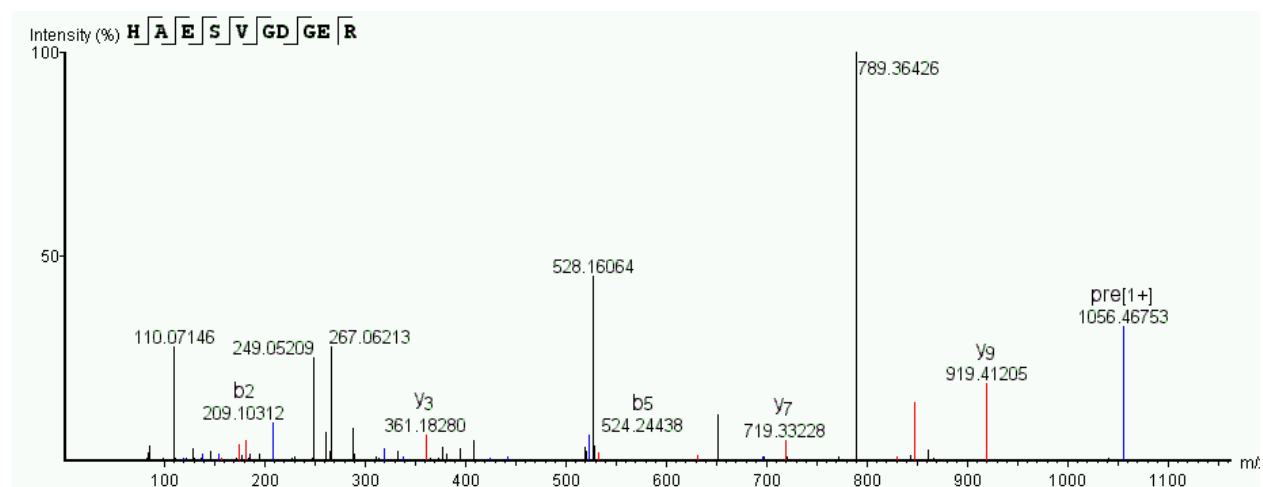

Identified protein:

|P30533|AMRP\_HUMAN Alpha-2-macroglobulin receptor-associated protein

**174. MS/MS at  $m/z$  682.3391 (1+, RT=24.9628)**

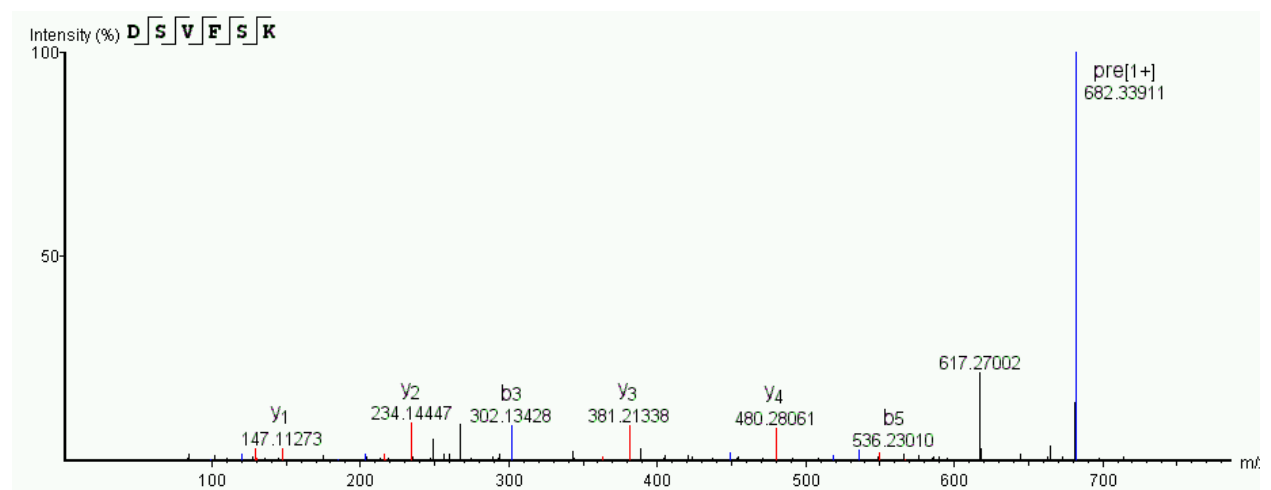

Identified protein:

|O60330-2|PCDGC\_HUMAN Isoform 2 of Protocadherin gamma-A12

175. MS/MS at m/z 945.51294 (3+, RT=78.5449)

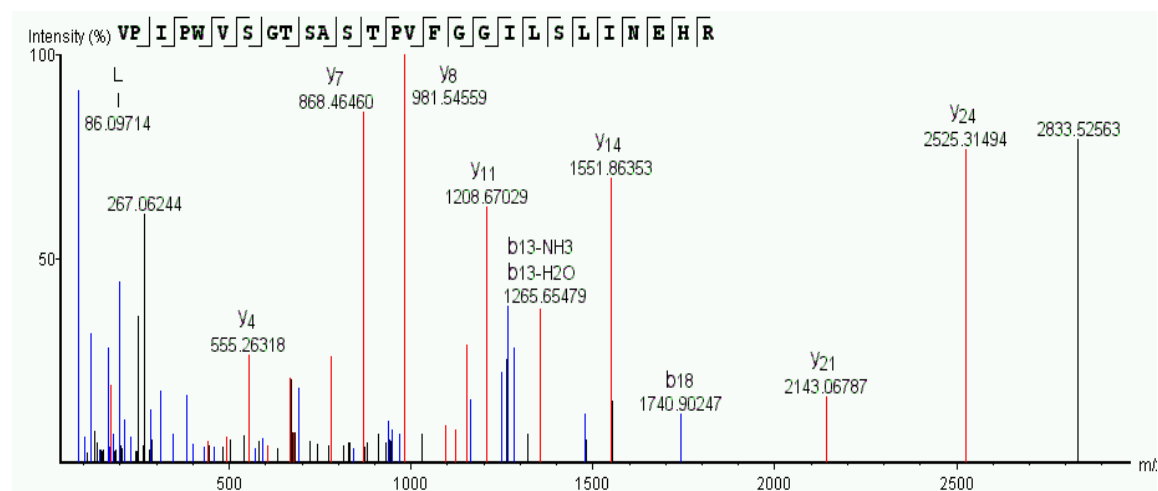

Identified protein:

|O14773|TPP1\_HUMAN Tripeptidyl-peptidase 1



**176. MS/MS at  $m/z$  643.63654 (3+, RT=46.2591)**

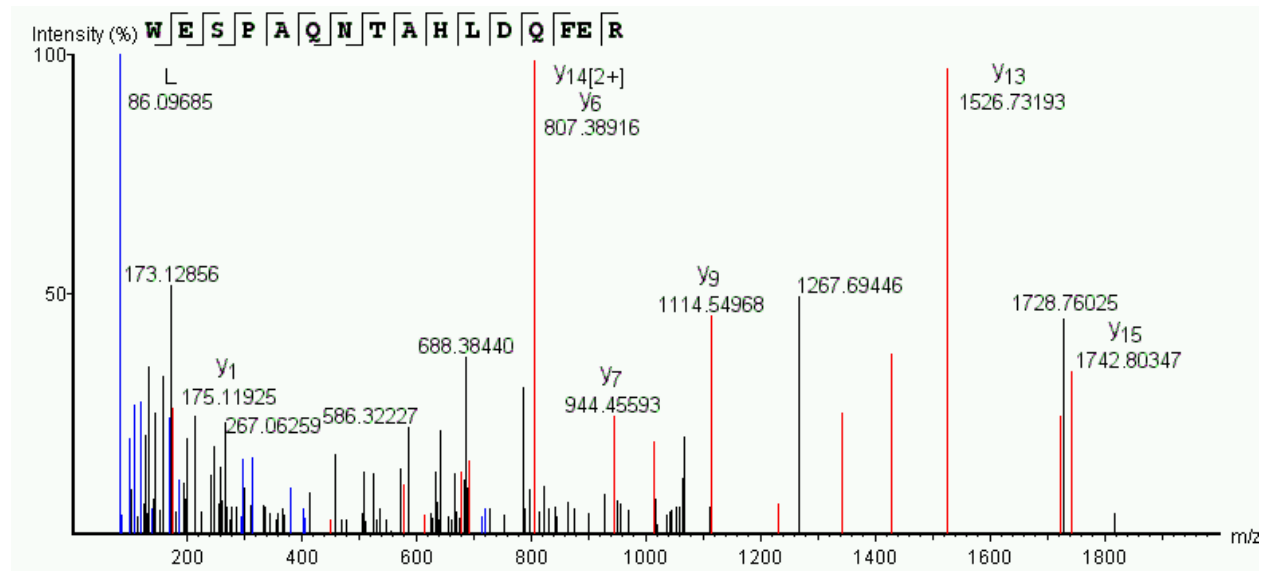

Identified protein:

|P17612-2|KAPCA\_HUMAN Isoform 2 of cAMP-dependent protein kinase catalytic subunit alpha

177. MS/MS at  $m/z$  653.36444 (2+, RT=59.4009)

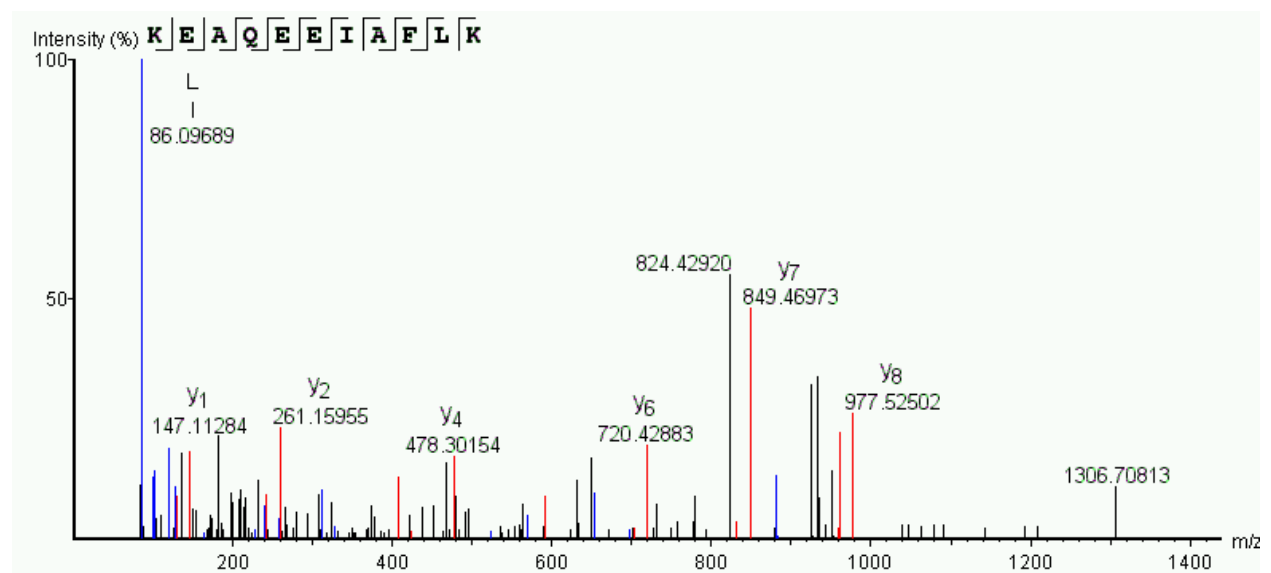

Identified protein:

|H0Y867|H0Y867\_HUMAN Golgin subfamily B member 1 (Fragment)

**178. MS/MS at m/z 660.3383 (4+, RT=63.4068)**

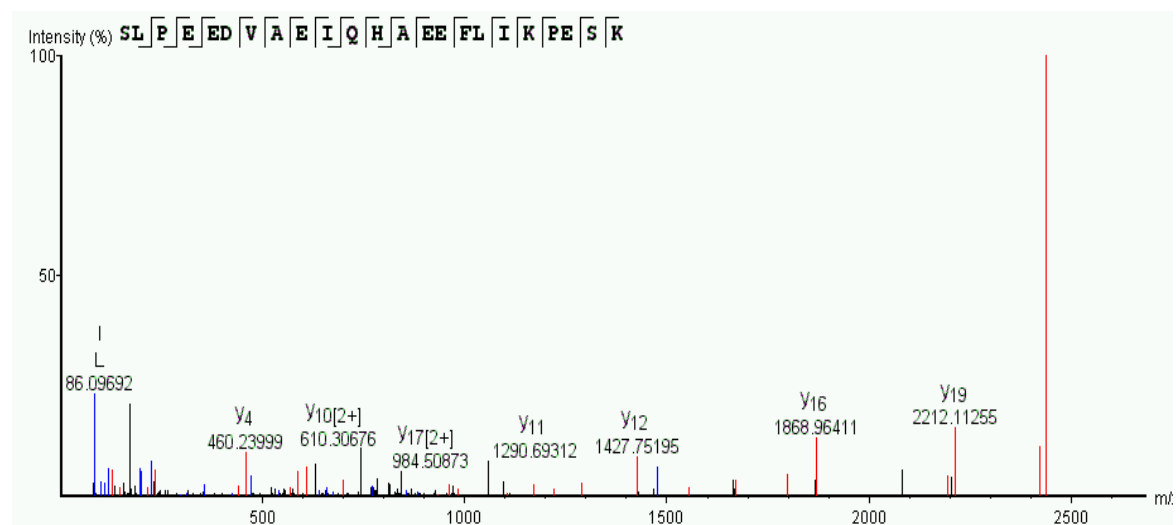

Identified protein:

|Q15286|RAB35\_HUMAN Ras-related protein Rab-35

179. MS/MS at  $m/z$  723.3622 (2+, RT=54.5373)

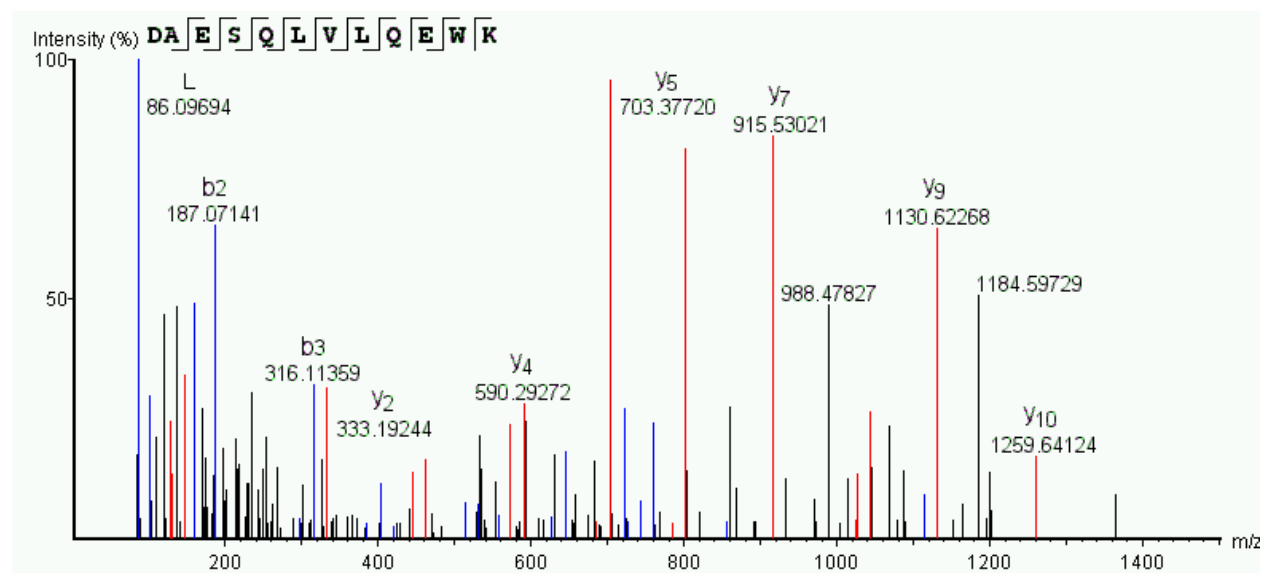

Identified protein:

|Q86UY8|NT5D3\_HUMAN 5'-nucleotidase domain-containing protein 3

**180. MS/MS at m/z 654.82434 (2+, RT=47.6141)**

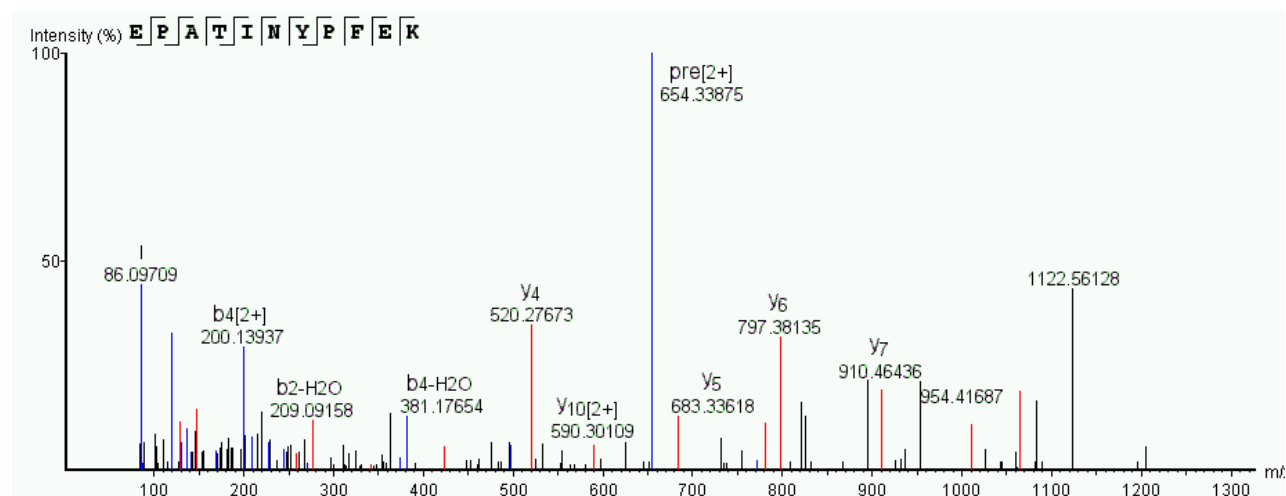

Identified protein:

|E9PPW7| NDUFS8\_HUMAN NADH dehydrogenase [ubiquinone] iron-sulfur protein 8, mitochondrial (Fragment)

**181. MS/MS at m/z 567.79376 (2+, RT=50.0369)**

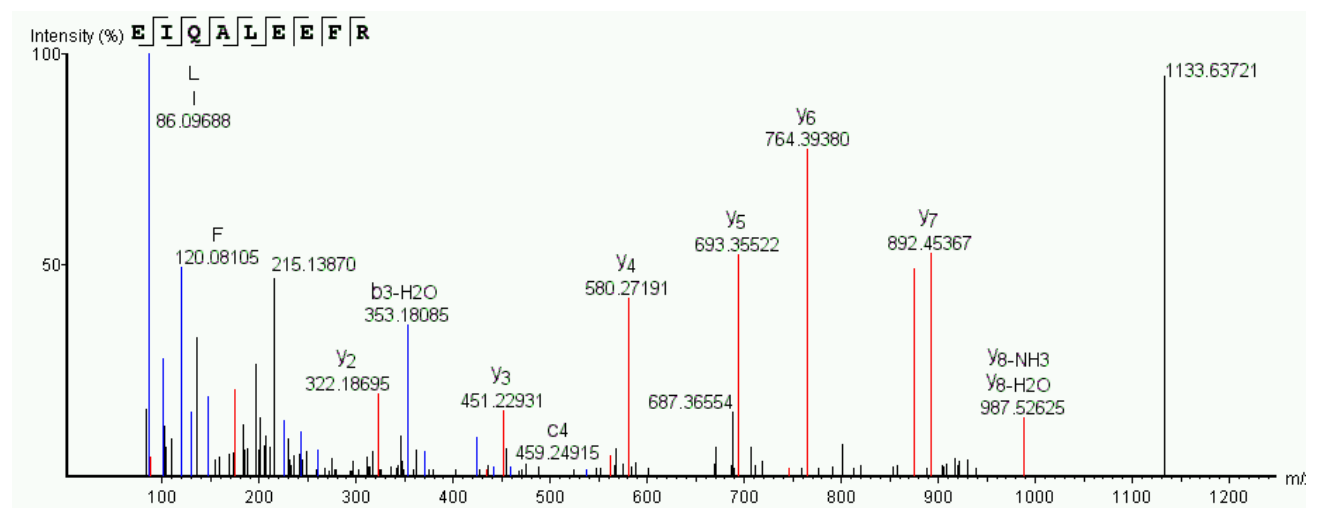

Identified protein:

|Q9C0E8-2|LNP\_HUMAN Isoform 2 of Protein lunapark OS=Homo sapiens GN=LNP

**182. MS/MS at m/z 812.771 (3+, RT=87.9006)**

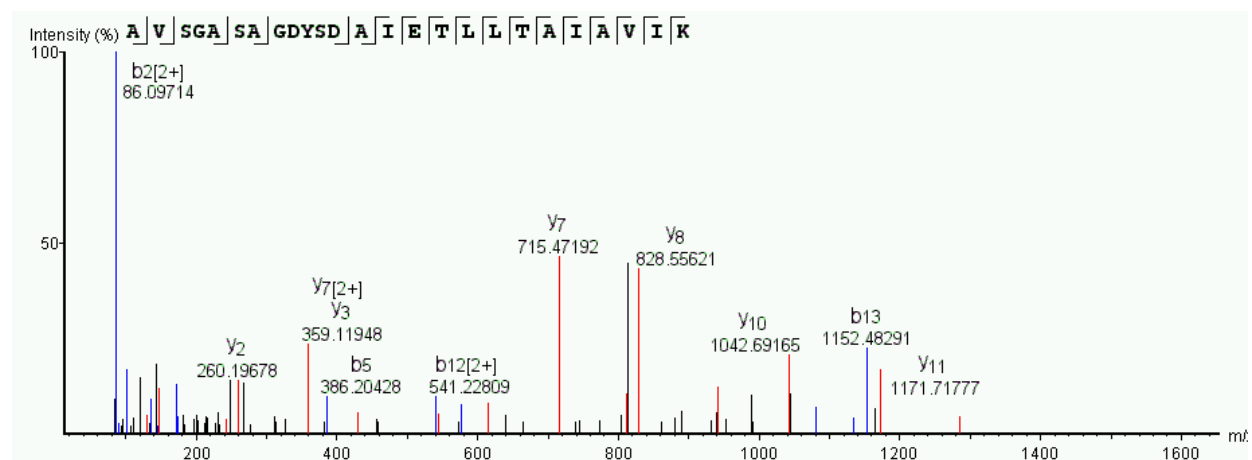

Identified protein

|F5H669|CPSF7\_HUMAN Cleavage and polyadenylation-specificity factor subunit 7 (Fragment)

**183. MS/MS at  $m/z$  815.89124 (2+, RT=47.2336)**

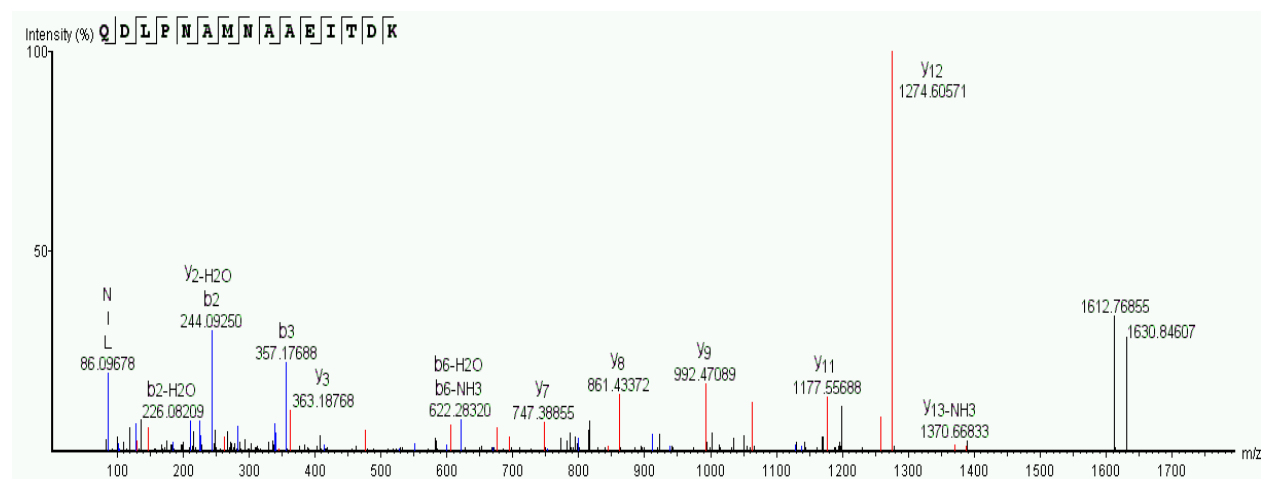

Identified protein:

|P84077|ARF1\_HUMAN ADP-ribosylation factor 1



**184. MS/MS at m/z 712.3759 (2+, RT=65.8284)**

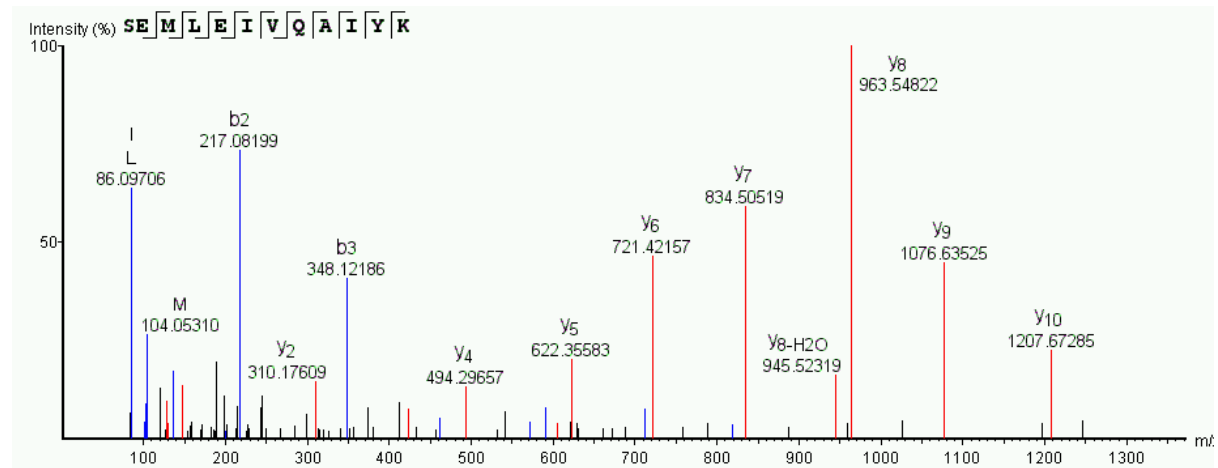

Identified protein:

|P37235|HPCL1\_HUMAN Hippocalcin-like protein 1

**185. MS/MS at  $m/z$  567.3019 (2+, RT=40.3093)**

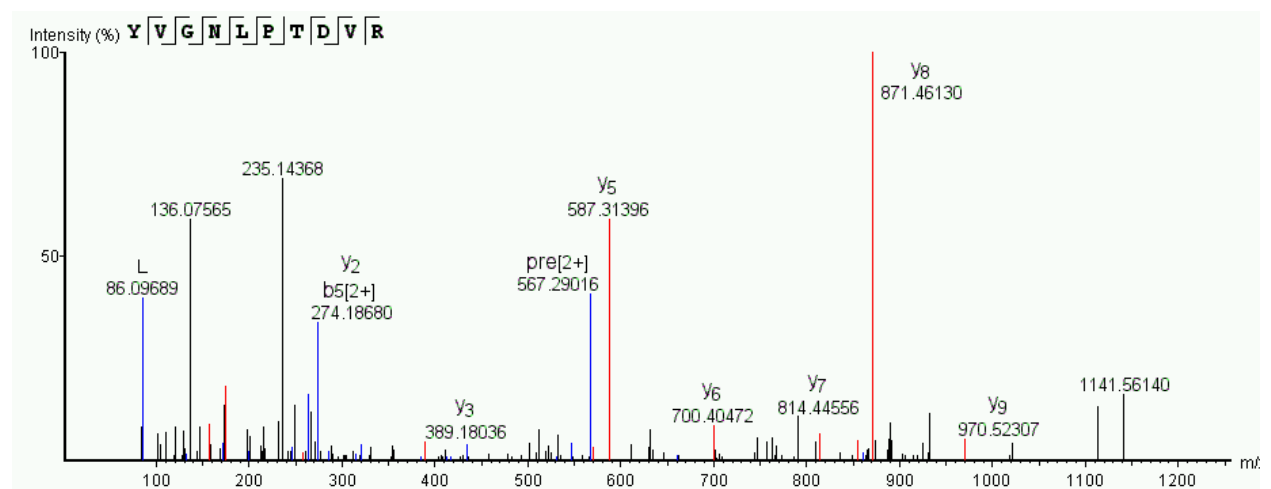

Identified protein:

|Q13242|SRSF9\_HUMAN Serine/arginine-rich splicing factor 9

**186. MS/MS at m/z 530.2633 (2+, RT=33.1826)**

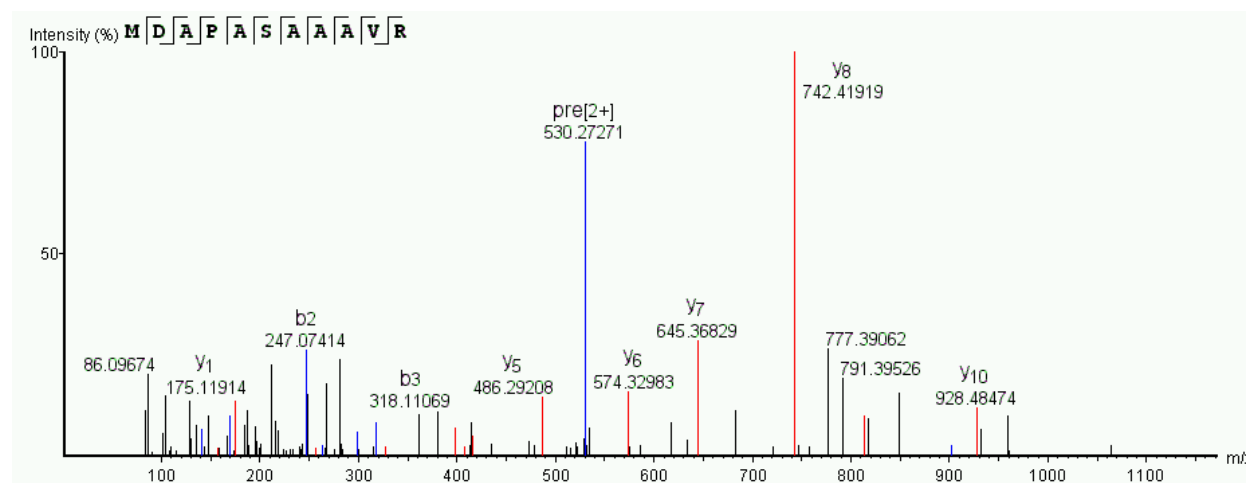

Identified protein:

|H3BLU7| AKR7A2\_HUMAN Aflatoxin B1 aldehyde reductase member 2 (Fragment)

**187. MS/MS at  $m/z$  720.03424 (3+, RT=76.1061)**

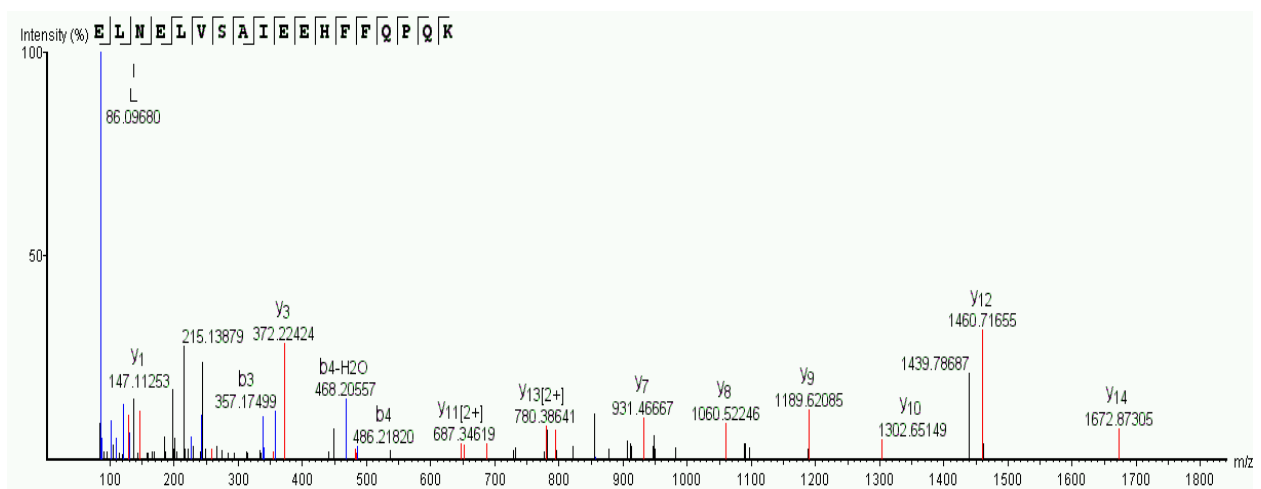

Identified protein:

|Q96G03|PGM2\_HUMAN Phosphoglucomutase-2

**188. MS/MS at m/z 542.2714 (2+, RT=29.481)**

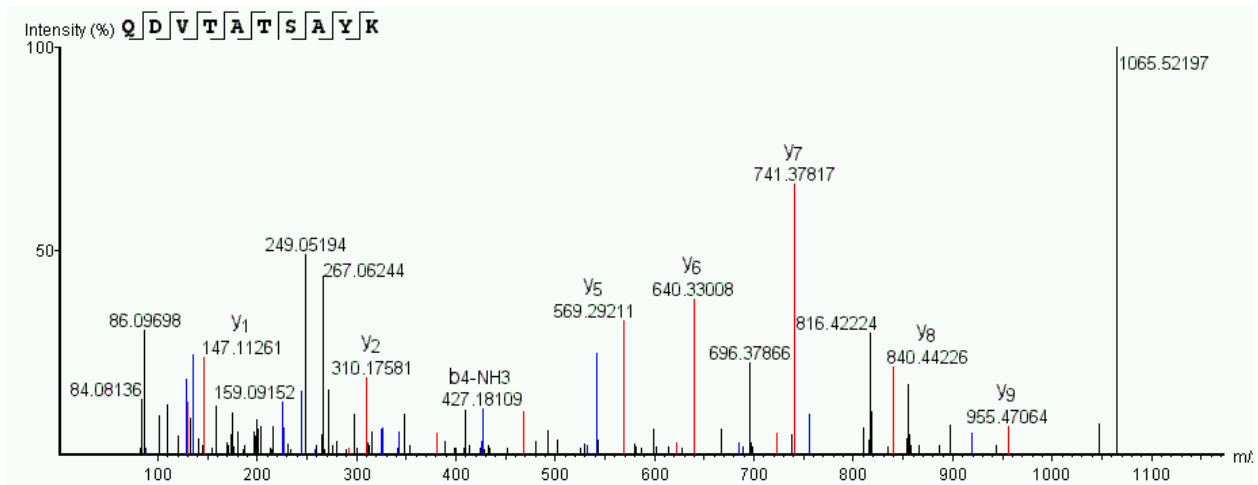

Identified protein

|P55327-2|TPD52\_HUMAN Isoform 2 of Tumor protein D52

189. MS/MS at  $m/z$  533.29333 (3+, RT=44.5145)

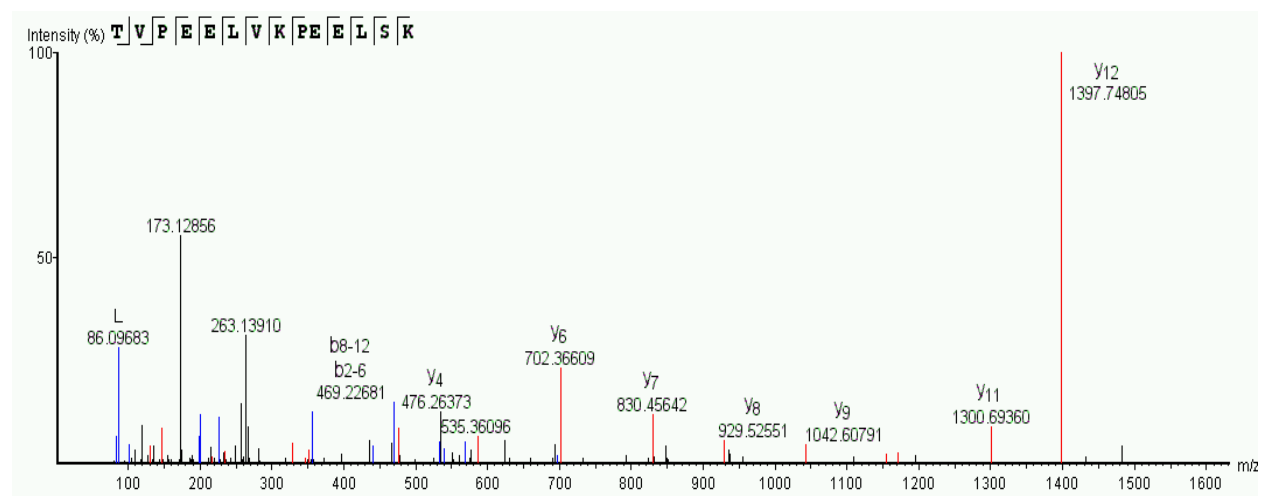

Identified protein:

|Q9UMS4|PRP19\_HUMAN Pre-mRNA-processing factor 19

**190. MS/MS at m/z 617.36554 (1+, RT=45.2074)**

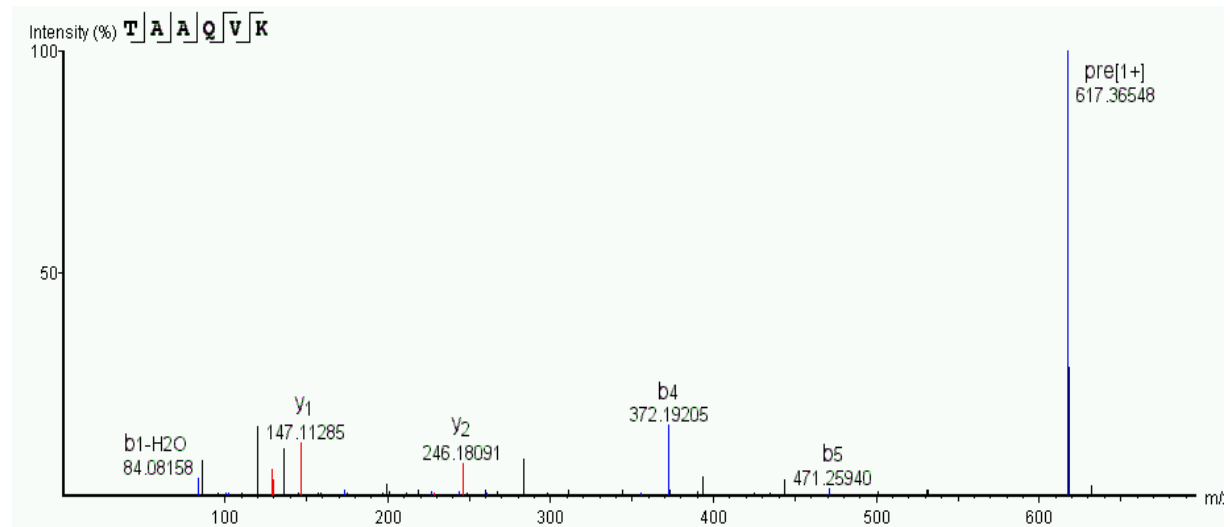

Identified protein:

|O60506-2|HNRPQ\_HUMAN Isoform 2 of Heterogeneous nuclear ribonucleoprotein Q

191. MS/MS at m/z 731.74243 (3+, RT=78.3466)

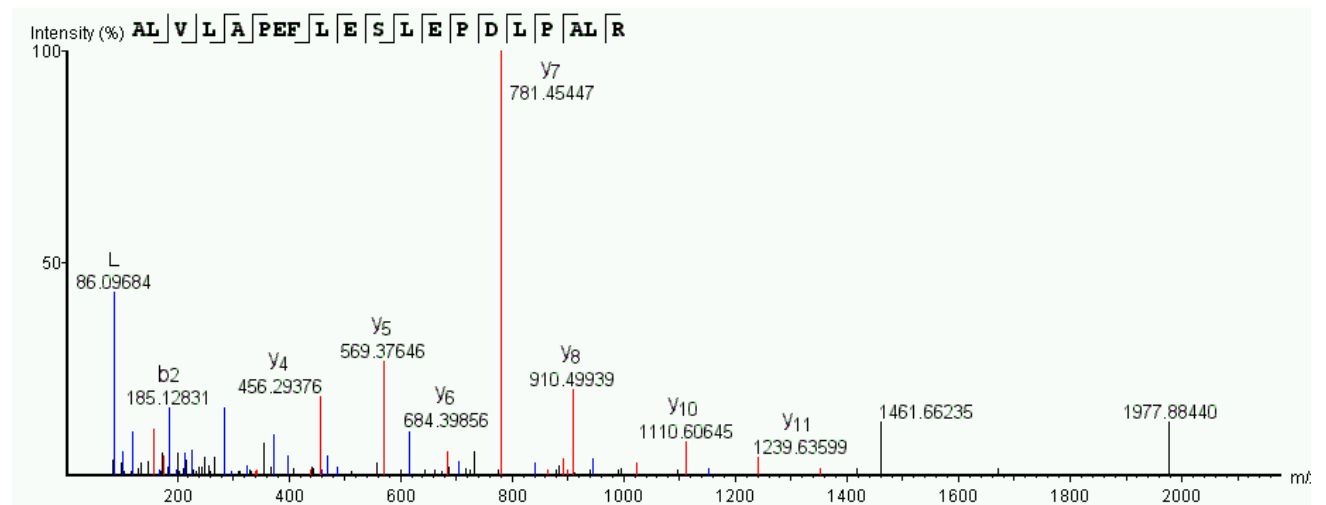

Identified protein:

|Q5K4L6|S27A3\_HUMAN Long-chain fatty acid transport protein 3



192. MS/MS at  $m/z$  557.2728 (2+, RT=26.9997)

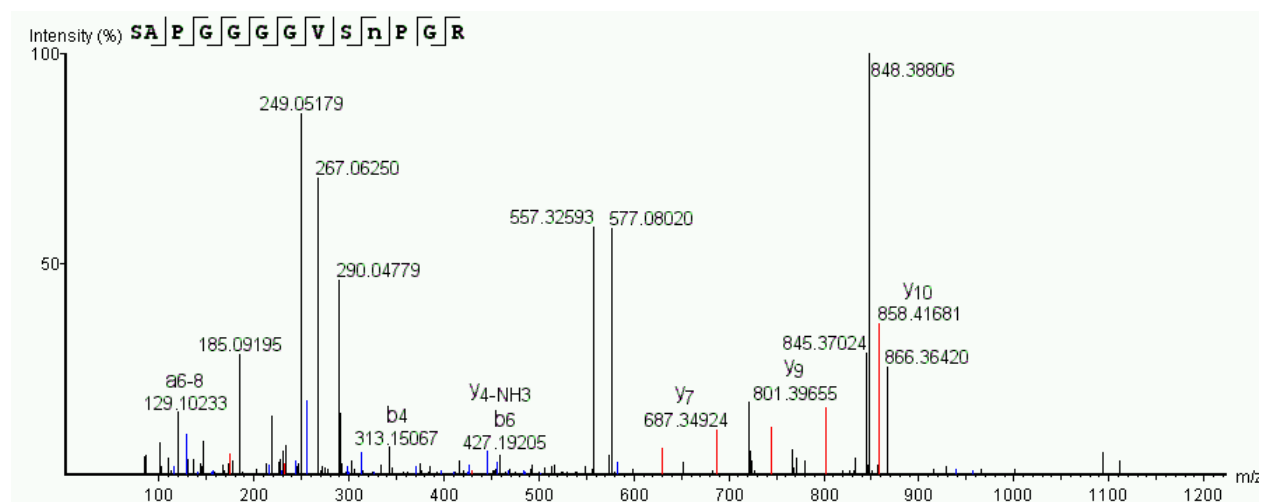

Identified protein:

|J3KSN1| LASP1\_HUMAN LIM and SH3 domain protein 1 (Fragment) OS=Homo sapiens GN= PE=1 SV=1

193. MS/MS at  $m/z$  674.3599 (1+, RT=14.8208)

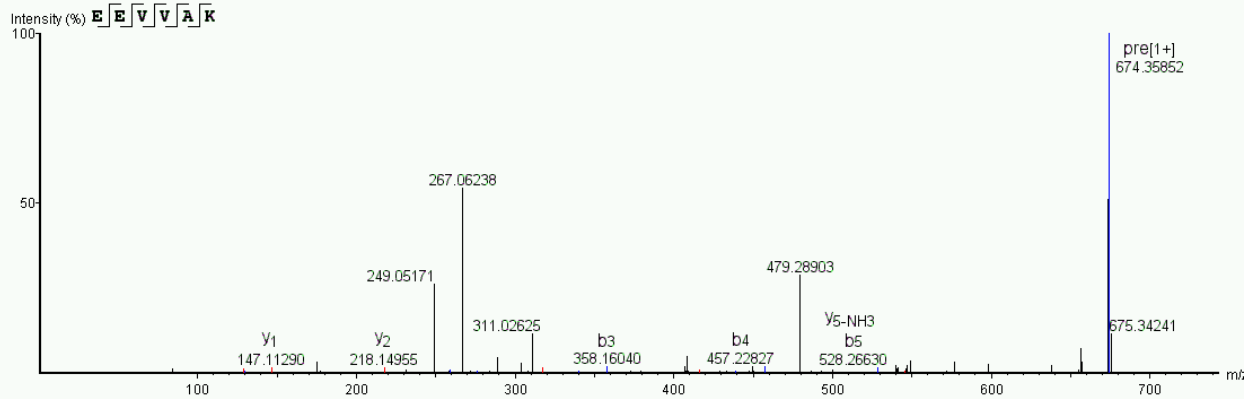

| # | Immonium  | b         | b-H2O     | b-NH3     | c         | b (2+)    | Seq | y         | y-H2O     | y-NH3     | y (2+)    | # |
|---|-----------|-----------|-----------|-----------|-----------|-----------|-----|-----------|-----------|-----------|-----------|---|
| 1 | 102.05541 | 130.08633 | 112.03986 | 113.02341 | 147.11290 | 65.52521  | E   |           |           |           |           | 6 |
| 2 | 102.05541 | 259.09253 | 241.08244 | 242.06599 | 276.13272 | 130.04649 | E   | 545.32727 | 527.31873 | 528.26630 | 273.16464 | 5 |
| 3 | 72.08124  | 358.16040 | 340.15265 | 341.13443 | 375.18842 | 179.58070 | V   | 416.28558 | 398.27615 | 399.25974 | 208.64336 | 4 |
| 4 | 72.08124  | 457.22827 | 439.21677 | 440.20282 | 474.25681 | 229.11490 | V   | 317.21674 | 299.20773 | 300.19131 | 159.10915 | 3 |
| 5 | 44.04993  | 528.26630 | 510.25635 | 511.23993 | 545.32727 | 264.63345 | A   | 218.14955 | 200.13934 | 201.12289 | 109.57495 | 2 |
| 6 | 101.10778 |           |           |           |           |           | K   | 147.11290 | 129.10211 | 130.08633 | 74.05640  | 1 |

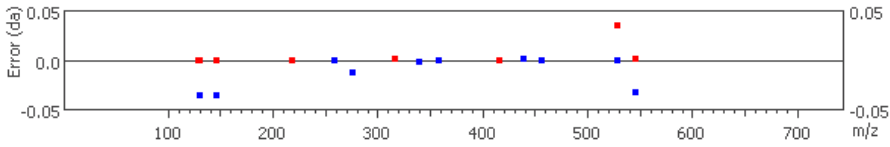

Identified protein:

|V9GZ56| LSM4\_HUMAN U6 snRNA-associated Sm-like protein LSM4 (Fragment)

**194. MS/MS at  $m/z$  499.73718 (2+, RT=32.8547)**

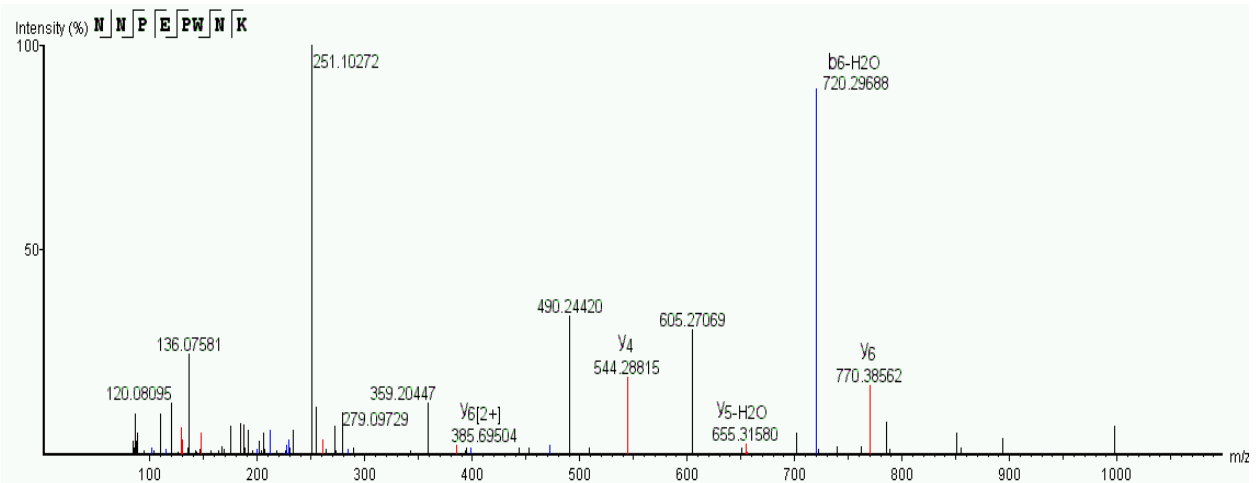

Identified protein:

|O00483|NDUA4\_HUMAN Cytochrome c oxidase subunit NDUF4A

195. MS/MS at  $m/z$  715.8637 (2+, RT=53.7144)

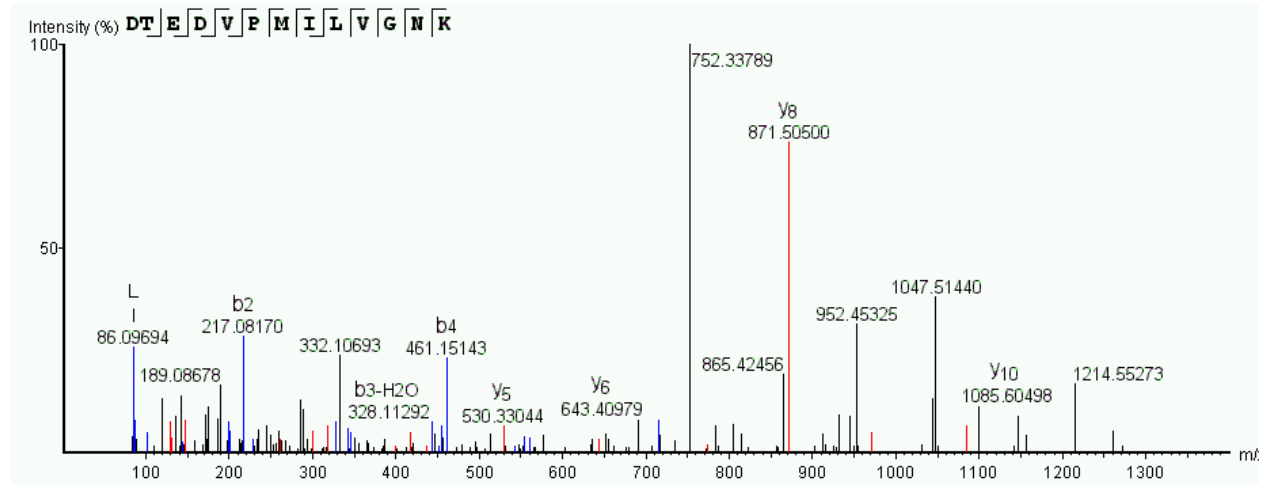

| #  | Immonium  | b          | b-H2O      | b-NH3      | c          | b (2+)    | Seq | y          | y-H2O      | y-NH3      | y (2+)    | #  |
|----|-----------|------------|------------|------------|------------|-----------|-----|------------|------------|------------|-----------|----|
| 1  | 88.03976  | 116.03477  | 98.02421   | 99.00777   | 133.06177  | 58.51738  | D   |            |            |            |           | 13 |
| 2  | 74.06051  | 217.08170  | 199.07135  | 200.05544  | 234.10944  | 109.04122 | T   | 1315.69263 | 1297.68213 | 1298.66565 | 658.34631 | 12 |
| 3  | 102.05519 | 346.12311  | 328.11292  | 329.09805  | 363.15204  | 173.56252 | E   | 1214.64490 | 1196.63440 | 1197.61792 | 607.82245 | 11 |
| 4  | 88.03976  | 461.15143  | 443.13947  | 444.12500  | 478.17899  | 231.07599 | D   | 1085.60498 | 1067.59180 | 1068.57532 | 543.30115 | 10 |
| 5  | 72.08124  | 560.21753  | 542.20923  | 543.19342  | 577.24744  | 280.61020 | V   | 970.56555  | 952.56482  | 953.54840  | 485.78769 | 9  |
| 6  | 70.06558  | 657.27313  | 639.26257  | 640.24615  | 674.30017  | 329.13657 | P   | 871.50500  | 853.49640  | 854.47998  | 436.25577 | 8  |
| 7  | 104.05332 | 788.31360  | 770.30304  | 771.28662  | 805.34064  | 394.65680 | M   | 774.45728  | 756.44366  | 757.42725  | 387.72711 | 7  |
| 8  | 86.09694  | 901.39771  | 883.38715  | 884.37073  | 918.42474  | 451.17828 | I   | 643.40979  | 625.40314  | 626.38672  | 322.20685 | 6  |
| 9  | 86.09694  | 1014.48175 | 996.47119  | 997.45477  | 1031.50879 | 507.74088 | L   | 530.33044  | 512.31909  | 513.30267  | 265.66483 | 5  |
| 10 | 72.08124  | 1113.55017 | 1095.53967 | 1096.52319 | 1130.57715 | 557.27509 | V   | 417.24408  | 399.23502  | 400.17212  | 209.12279 | 4  |
| 11 | 30.03429  | 1170.57166 | 1152.56116 | 1153.54468 | 1187.59863 | 585.78583 | G   | 318.17691  | 300.15399  | 301.15021  | 159.58859 | 3  |
| 12 | 87.05592  | 1284.61450 | 1266.60400 | 1267.58752 | 1301.64148 | 642.80725 | N   | 261.15784  | 243.14516  | 244.12871  | 131.08150 | 2  |
| 13 | 101.10778 |            |            |            |            |           | K   | 147.11275  | 129.10219  | 130.08578  | 74.05640  | 1  |

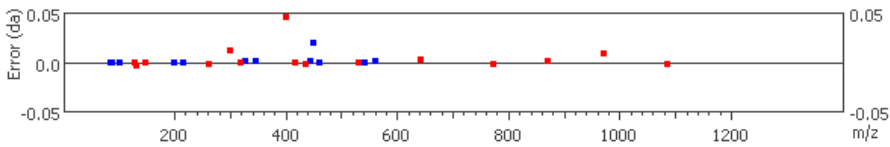

Identified protein:

|P62834|RAP1A\_HUMAN Ras-related protein Rap-1A
